# Supplementary material for: Synthesis of diversely substituted 2-(furan-3-yl)acetates from allenols through cascade carbonylations
Source: Royal Society of Chemistry journal article supplement (doi:10.1039/c5cc06150d), 2015-01-01
Supplement: c5cc06150d1.pdf [file c5cc06150d1.pdf]

## Supporting Information

### Synthesis of diversely substituted 2-(furan-3-yl)acetates from allenols through cascade carbonylations

Yan He, Xinying Zhang\*, and Xuesen Fan\*

*School of Environment, School of Chemistry and Chemical Engineering, Collaborative Innovation Centre of Henan Province for Green Manufacturing of Fine Chemicals, Key Laboratory of Green Chemical Media and Reactions, Ministry of Education, Henan Key Laboratory for Environmental Pollution Control, Henan Normal University, Xinxiang, Henan 453007, P. R. China. E-mail: xuesen.fan@htu.cn; xinyingzhang@htu.cn*

|            |                                                                        |       |
|------------|------------------------------------------------------------------------|-------|
| <b>I</b>   | General Experimental Information                                       | 2     |
| <b>II</b>  | Experimental Procedures and Spectroscopic Data                         | 3-15  |
| <b>III</b> | Copies of $^1\text{H}$ and $^{13}\text{C}$ NMR spectra of <b>4a-4x</b> | 16-39 |
| <b>IV</b>  | Copies of $^1\text{H}$ and $^{13}\text{C}$ NMR spectra of <b>6a-6j</b> | 40-49 |
| <b>V</b>   | Copies of $^1\text{H}$ and $^{13}\text{C}$ NMR spectra of <b>7a-7d</b> | 50-53 |
| <b>VI</b>  | Copies of $^1\text{H}$ and $^{13}\text{C}$ NMR spectra of <b>8a-8d</b> | 54-57 |
| <b>VII</b> | References                                                             | 58    |

## I. General Experimental Information

Commercial reagents were used without further purification, and the solvents were dried before using. Allenols (**1**) were synthesized through zinc promoted reaction of 1-bromobut-2-yne/1-bromopent-2-yne with the corresponding aldehydes.<sup>1-3</sup> Allenols (**5a-5i**) were prepared through CuI and dicyclohexylamine promoted reaction of 1-phenylprop-2-yn-1-ols with paraformaldehyde.<sup>4</sup> 1,4-Diphenylbuta-2,3-dien-1-ol (**5j**) was synthesized through KBH<sub>4</sub> promoted reduction of the corresponding allenic ketones, which were prepared through reaction of 2-(triphenylphosphoranylidene)acetophenone with phenyl acetyl chloride based on a literature procedure.<sup>5</sup> Melting points were recorded with a micro melting point apparatus and uncorrected. <sup>1</sup>H and <sup>13</sup>C NMR spectra were recorded at 400 and 100 MHz, respectively. High-resolution mass spectra (HRMS) were obtained by using a MicrOTOF mass spectrometer. All reactions were monitored by thin-layer chromatography (TLC) using silica gel plates (silica gel 60 F254 0.25 mm) and components were visualized by observation under UV light (254 and 365 nm).

## II. Experimental Procedures and Spectroscopic Data

### 1. Typical procedure for the preparation of ethyl 2-(4-methyl-2,5-diphenylfuran-3-yl)acetate (4a)

To a flask containing 2-methyl-1-phenylbuta-2,3-dien-1-ol (0.3 mmol) and iodobenzene (0.6 mmol) in CH<sub>3</sub>CN (2 mL) was added PdCl<sub>2</sub> (0.03 mmol), PivOH (0.12 mmol), EtOH (3 mmol) and K<sub>2</sub>CO<sub>3</sub> (0.3 mmol). The mixture was then stirred at 80 °C under CO atmosphere (1 atm). Upon completion, the reaction was quenched with aqueous NH<sub>4</sub>Cl and extracted with ethyl acetate (10 mL × 3). The combined organic layers were washed with water and brine, and dried over anhydrous Na<sub>2</sub>SO<sub>4</sub>. The solvent was evaporated under vacuum and the crude product was purified by column chromatography on silica-gel to afford **4a** in 63% yield. Other furan derivatives **4b-4x** and **6a-6j** were prepared in a similar manner.

#### Ethyl 2-(4-methyl-2,5-diphenylfuran-3-yl)acetate (4a)

Eluent: ethyl acetate/hexanes (5%); yellow liquid (60 mg, 63%); <sup>1</sup>H NMR (400 MHz, CDCl<sub>3</sub>) δ: 1.31 (t, *J* = 7.2 Hz, 3H), 2.31 (s, 3H), 3.67 (s, 2H), 4.24 (q, *J* = 7.2 Hz, 2H), 7.31 (d, *J* = 7.2 Hz, 1H), 7.35 (d, *J* = 7.6 Hz, 1H), 7.43-7.48 (m, 4H), 7.72-7.76 (m, 4H). <sup>13</sup>C NMR (100 MHz, CDCl<sub>3</sub>) δ: 10.0, 14.2, 30.8, 61.1, 116.5, 118.8, 125.7, 126.2, 126.9, 127.5, 128.5, 128.7, 131.0, 131.6, 148.0, 149.4, 171.3. HRMS calcd for C<sub>21</sub>H<sub>21</sub>O<sub>3</sub>: 321.1485 [M+H]<sup>+</sup>, found: 321.1482.

#### Ethyl 2-(4-methyl-2-phenyl-5-o-tolylfuran-3-yl)acetate (4b)

Eluent: ethyl acetate/hexanes (5%); yellow liquid (50 mg, 50%); <sup>1</sup>H NMR (400 MHz, CDCl<sub>3</sub>) δ: 1.35 (t, *J* = 7.2 Hz, 3H), 2.13 (s, 3H), 2.47 (s, 3H), 3.70 (s, 2H), 4.28 (q, *J* = 7.2 Hz, 2H), 7.30-7.36 (m, 4H), 7.42-7.49 (m, 3H), 7.76 (d, *J* = 7.6 Hz, 2H). <sup>13</sup>C NMR (100 MHz, CDCl<sub>3</sub>) δ: 9.5, 14.2, 20.6, 31.0, 61.0, 115.3, 119.4, 125.5, 126.0, 127.4, 128.3, 128.6, 130.0, 130.6, 130.7, 131.2, 137.6, 149.0, 149.6, 171.3. HRMS calcd for C<sub>22</sub>H<sub>23</sub>O<sub>3</sub>: 335.1642 [M+H]<sup>+</sup>, found: 335.1646.

#### Ethyl 2-(5-(3-bromophenyl)-4-methyl-2-phenylfuran-3-yl)acetate (4c)

Eluent: ethyl acetate/hexanes (5%); yellow liquid (81 mg, 68%); <sup>1</sup>H NMR (400 MHz, CDCl<sub>3</sub>) δ: 1.32 (t, *J* = 7.2 Hz, 3H), 2.09 (s, 3H), 3.67 (s, 2H), 4.25 (q, *J* = 7.2 Hz, 2H), 7.24-7.49 (m, 6H), 7.71 (d, *J* = 8.4 Hz, 1H), 7.76 (d, *J* = 8.4 Hz, 2H). <sup>13</sup>C NMR (100 MHz, CDCl<sub>3</sub>) δ: 9.7, 14.2, 31.0, 61.0, 115.3, 120.6, 123.6, 126.3, 127.0, 127.6, 128.6, 129.8, 131.0, 132.1, 132.3, 133.4, 147.5, 150.2, 171.2. HRMS calcd for C<sub>21</sub>H<sub>20</sub>BrO<sub>3</sub>: 399.0590 [M+H]<sup>+</sup>, found: 399.0593.

**Ethyl 2-(5-(3-fluorophenyl)-4-methyl-2-phenylfuran-3-yl)acetate (4d)**

Eluent: ethyl acetate/hexanes (5%); yellow liquid (65 mg, 64%); <sup>1</sup>H NMR (400 MHz, CDCl<sub>3</sub>) δ: 1.31 (t, *J* = 7.2 Hz, 3H), 2.31 (s, 3H), 3.66 (s, 2H), 4.22-4.27 (m, 2H), 6.99 (t, *J* = 8.0 Hz, 1H), 7.34-7.51 (m, 6H), 7.75 (d, *J* = 7.6 Hz, 2H). <sup>13</sup>C NMR (100 MHz, CDCl<sub>3</sub>) δ: 10.1, 14.2, 30.7, 61.1, 112.1, 112.4, 113.5, 113.7, 116.6, 119.8, 121.06, 121.09, 126.3, 127.8, 128.7, 130.0, 130.1, 130.7, 133.6, 133.7, 146.70, 146.74, 149.8, 161.8, 164.2, 171.1. HRMS calcd for C<sub>21</sub>H<sub>20</sub>FO<sub>3</sub>: 339.1391 [M+H]<sup>+</sup>, found: 339.1388.

**Ethyl 2-(4-methyl-2-phenyl-5-(4-(trifluoromethyl)phenyl)furan-3-yl)acetate (4e)**

Eluent: ethyl acetate/hexanes (5%); yellow solid (63 mg, 54%), mp 68-70 °C. <sup>1</sup>H NMR (400 MHz, CDCl<sub>3</sub>) δ: 1.32 (t, *J* = 7.2 Hz, 3H), 2.34 (s, 3H), 3.67 (s, 2H), 4.25 (q, *J* = 7.2 Hz, 2H), 7.37 (t, *J* = 7.6 Hz, 1H), 7.48 (t, *J* = 7.6 Hz, 2H), 7.69 (d, *J* = 8.0 Hz, 2H), 7.75 (d, *J* = 8.4 Hz, 2H), 7.82 (d, *J* = 8.0 Hz, 2H). <sup>13</sup>C NMR (100 MHz, CDCl<sub>3</sub>) δ: 10.2, 14.2, 30.7, 61.1, 116.8, 120.8, 125.4, 125.50, 125.53, 126.4, 128.0, 128.7, 130.6, 134.9, 146.5, 150.4, 171.0. HRMS calcd for C<sub>22</sub>H<sub>20</sub>F<sub>3</sub>O<sub>3</sub>: 389.1359 [M+H]<sup>+</sup>, found: 389.1365.

**Ethyl 2-(5-(3,4-dimethoxyphenyl)-4-methyl-2-phenylfuran-3-yl)acetate (4f)**

Eluent: ethyl acetate/hexanes (10%); yellow solid (65 mg, 57%), mp 54-55 °C. <sup>1</sup>H NMR (400 MHz, CDCl<sub>3</sub>) δ: 1.31 (t, *J* = 7.2 Hz, 3H), 2.28 (s, 3H), 3.66 (s, 2H), 3.94 (s, 3H), 3.97 (s, 3H), 4.24 (q, *J* = 7.2 Hz, 2H), 6.95 (d, *J* = 8.4 Hz, 1H), 7.26 (t, *J* = 8.0 Hz, 1H), 7.33 (t, *J* = 8.0 Hz, 1H), 7.44-7.49 (m, 2H), 7.74 (d, *J* = 7.2 Hz, 2H), 8.14 (d, *J* = 7.6 Hz, 1H). <sup>13</sup>C NMR (100 MHz, CDCl<sub>3</sub>) δ: 10.0, 14.2, 30.9, 56.0,

61.1, 109.2, 111.2, 116.4, 117.5, 118.6, 124.8, 126.2, 127.4, 128.5, 128.7, 130.2, 131.0, 148.0, 148.9, 171.3. HRMS calcd for C<sub>23</sub>H<sub>25</sub>O<sub>5</sub>: 381.1697 [M+H]<sup>+</sup>, found: 381.1699.

**Ethyl 2-(4-methyl-5-(naphthalen-1-yl)-2-phenylfuran-3-yl)acetate (4g)**

Eluent: ethyl acetate/hexanes (5%); yellow liquid (53 mg, 48%); <sup>1</sup>H NMR (400 MHz, CDCl<sub>3</sub>) δ: 1.35 (t, *J* = 7.2 Hz, 3H), 2.12 (s, 3H), 3.75 (s, 2H), 4.28 (q, *J* = 7.2 Hz, 2H), 7.34 (t, *J* = 7.2 Hz, 1H), 7.46 (t, *J* = 7.6 Hz, 2H), 7.48-7.64 (m, 4H), 7.78 (d, *J* = 8.0 Hz, 2H), 7.91-7.94 (m, 2H), 8.10-8.12 (m, 1H). <sup>13</sup>C NMR (100 MHz, CDCl<sub>3</sub>) δ: 9.7, 14.3, 31.1, 61.1, 115.7, 120.7, 125.2, 126.0, 126.1, 126.3, 126.4, 127.5, 128.1, 128.3, 128.6, 128.7, 128.8, 131.1, 131.9, 133.9, 148.2, 150.1, 171.3. HRMS calcd for C<sub>25</sub>H<sub>22</sub>O<sub>3</sub>Na: 393.1461 [M+Na]<sup>+</sup>, found: 393.1468.

**Ethyl 2-(4-methyl-2-phenyl-5-(thiophen-2-yl)furan-3-yl)acetate (4h)**

Eluent: ethyl acetate/hexanes (5%); yellow liquid (56 mg, 57%); <sup>1</sup>H NMR (400 MHz, CDCl<sub>3</sub>) δ: 1.30 (t, *J* = 7.2 Hz, 3H), 2.27 (s, 3H), 3.65 (s, 2H), 4.23 (q, *J* = 7.6 Hz, 2H), 7.12 (t, *J* = 4.4 Hz, 1H), 7.29-7.36 (m, 3H), 7.46 (t, *J* = 7.6 Hz, 2H), 7.73 (d, *J* = 7.6 Hz, 2H). <sup>13</sup>C NMR (100 MHz, CDCl<sub>3</sub>) δ: 9.7, 14.2, 30.8, 61.1, 116.3, 118.4, 122.9, 124.0, 126.2, 127.4, 127.6, 128.7, 130.7, 133.8, 144.4, 149.1, 171.1. HRMS calcd for C<sub>19</sub>H<sub>19</sub>O<sub>3</sub>S: 327.1049 [M+H]<sup>+</sup>, found: 327.1046.

**(E)-Ethyl 2-(4-methyl-2-phenyl-5-styrylfuran-3-yl)acetate (4i)**

Eluent: ethyl acetate/hexanes (5%); yellow liquid (64 mg, 62%); <sup>1</sup>H NMR (400 MHz, CDCl<sub>3</sub>) δ: 1.32 (t, *J* = 7.2 Hz, 3H), 2.19 (s, 3H), 3.64 (s, 2H), 4.22-4.27 (q, *J* = 7.2 Hz, 2H), 6.99 (d, *J* = 16.4 Hz, 1H), 7.13 (d, *J* = 16.0 Hz, 1H), 7.28 (d, *J* = 6.8 Hz, 1H), 7.35-7.41 (m, 3H), 7.49 (t, *J* = 7.6 Hz, 2H), 7.55 (d, *J* = 7.6 Hz, 2H), 7.79 (d, *J* = 8.0 Hz, 2H). <sup>13</sup>C NMR (100 MHz, CDCl<sub>3</sub>) δ: 8.7, 14.2, 30.8, 61.1, 114.6, 116.3, 121.5, 125.9, 126.3, 127.3, 127.7, 128.7, 130.8, 137.5, 148.0, 149.8, 171.1. HRMS calcd for C<sub>23</sub>H<sub>23</sub>O<sub>3</sub>: 347.1642 [M+H]<sup>+</sup>, found: 347.1643.

**Ethyl 2-(5-benzyl-4-methyl-2-phenylfuran-3-yl)acetate (4j)**

Eluent: ethyl acetate/hexanes (5%); yellow liquid (52 mg, 52%);  $^1\text{H}$  NMR (400 MHz,  $\text{CDCl}_3$ )  $\delta$ : 1.30 (t,  $J = 7.6$  Hz, 3H), 2.04 (s, 3H), 3.60 (s, 2H), 4.03 (s, 2H), 4.23 (d,  $J = 7.2$  Hz, 2H), 7.24-7.35 (m, 6H), 7.41 (t,  $J = 8.0$  Hz, 2H), 7.64 (d,  $J = 7.6$  Hz, 2H).  $^{13}\text{C}$  NMR (100 MHz,  $\text{CDCl}_3$ )  $\delta$ : 8.5, 14.2, 31.0, 32.5, 61.0, 114.8, 117.8, 125.9, 126.3, 127.2, 128.4, 128.5, 128.6, 131.2, 138.7, 148.6, 148.9, 171.4. HRMS calcd for  $\text{C}_{22}\text{H}_{23}\text{O}_3$ : 335.1642  $[\text{M}+\text{H}]^+$ , found: 335.1645.

#### **Ethyl 2-(4-methyl-5-phenethyl-2-phenylfuran-3-yl)acetate (4k)**

Eluent: ethyl acetate/hexanes (5%); yellow liquid (57 mg, 55%);  $^1\text{H}$  NMR (400 MHz,  $\text{CDCl}_3$ )  $\delta$ : 1.31 (t,  $J = 7.2$  Hz, 3H), 1.86 (s, 3H), 2.96 (d,  $J = 7.2$  Hz, 2H), 3.01 (d,  $J = 7.2$  Hz, 2H), 3.58 (s, 2H), 4.23 (q,  $J = 7.6$  Hz, 2H), 7.21-7.34 (m, 6H), 7.45 (t,  $J = 7.6$  Hz, 2H), 7.68 (d,  $J = 8.0$  Hz, 2H).  $^{13}\text{C}$  NMR (100 MHz,  $\text{CDCl}_3$ )  $\delta$ : 8.2, 14.2, 28.5, 30.9, 34.9, 61.0, 114.7, 117.2, 126.0, 126.3, 127.1, 128.4, 128.5, 128.6, 131.4, 141.5, 148.4, 149.6, 171.4. HRMS calcd for  $\text{C}_{23}\text{H}_{24}\text{O}_3\text{Na}$ : 371.1618  $[\text{M}+\text{Na}]^+$ , found: 371.1612.

#### **Ethyl 2-(4-ethyl-2-phenyl-5-p-tolylfuran-3-yl)acetate (4l)**

Eluent: ethyl acetate/hexanes (5%); yellow liquid (61 mg, 58%);  $^1\text{H}$  NMR (400 MHz,  $\text{CDCl}_3$ )  $\delta$ : 1.24-1.31 (m, 6H), 2.41 (s, 3H), 2.72 (q,  $J = 7.6$  Hz, 2H), 3.67 (s, 2H), 4.23 (q,  $J = 7.2$  Hz, 2H), 7.24-7.28 (m, 2H), 7.32 (t,  $J = 7.6$  Hz, 1H), 7.45 (t,  $J = 7.6$  Hz, 2H), 7.61 (d,  $J = 7.6$  Hz, 2H), 7.74 (d,  $J = 7.6$  Hz, 2H).  $^{13}\text{C}$  NMR (100 MHz,  $\text{CDCl}_3$ )  $\delta$ : 14.2, 14.4, 17.4, 21.3, 30.6, 61.1, 115.7, 124.4, 125.5, 126.1, 127.4, 128.6, 129.3, 136.8, 147.9, 150.9, 171.6. HRMS calcd for  $\text{C}_{23}\text{H}_{25}\text{O}_3$ : 349.1798  $[\text{M}+\text{H}]^+$ , found: 349.1797.

#### **Ethyl 2-(4-ethyl-5-(naphthalen-1-yl)-2-phenylfuran-3-yl)acetate (4m)**

Eluent: ethyl acetate/hexanes (5%); yellow liquid (55 mg, 48%);  $^1\text{H}$  NMR (400 MHz,  $\text{CDCl}_3$ )  $\delta$ : 1.10 (t,  $J = 7.6$  Hz, 3H), 1.33 (t,  $J = 7.2$  Hz, 3H), 2.54 (q,  $J = 7.2$  Hz, 2H), 3.77 (s, 2H), 4.27 (q,  $J = 7.2$  Hz, 2H), 7.32 (t,  $J = 7.6$  Hz, 1H), 7.44 (t,  $J = 7.6$  Hz, 2H), 7.52-7.62 (m, 4H), 7.75 (d,  $J = 8.0$  Hz, 2H), 7.93 (d,  $J = 7.6$  Hz, 2H), 8.04 (d,  $J = 7.2$  Hz, 1H).  $^{13}\text{C}$  NMR (100 MHz,  $\text{CDCl}_3$ )  $\delta$ : 14.2, 14.9, 17.2, 31.0, 61.1, 114.9,

125.1, 126.0, 126.1, 126.3, 126.4, 126.7, 127.4, 128.20, 128.25, 128.6, 128.9, 129.0, 131.1, 132.4, 133.9, 148.0, 150.3, 171.5. HRMS calcd for C<sub>26</sub>H<sub>25</sub>O<sub>3</sub>: 385.1798 [M+H]<sup>+</sup>, found: 385.1804.

**Ethyl 2-(2-(4-methoxyphenyl)-4-methyl-5-phenylfuran-3-yl)acetate (4n)**

Eluent: ethyl acetate/hexanes (5%); yellow liquid (53 mg, 50%); <sup>1</sup>H NMR (400 MHz, CDCl<sub>3</sub>) δ: 1.30-1.34 (m, 3H), 2.31 (s, 3H), 3.63 (s, 2H), 3.87 (s, 3H), 4.25 (q, *J* = 7.2 Hz, 2H), 7.01 (d, *J* = 8.8 Hz, 2H), 7.30 (t, *J* = 8.4 Hz, 1H), 7.45 (t, *J* = 8.0 Hz, 2H), 7.70-7.73 (m, 4H). <sup>13</sup>C NMR (100 MHz, CDCl<sub>3</sub>) δ: 10.1, 14.2, 30.8, 55.3, 61.1, 114.1, 115.2, 118.7, 123.8, 125.5, 126.7, 127.7, 128.5, 131.8, 147.4, 149.5, 159.2, 171.4. HRMS calcd for C<sub>22</sub>H<sub>23</sub>O<sub>4</sub>: 351.1591 [M+H]<sup>+</sup>, found: 351.1589.

**Ethyl 2-(2-(2-bromo-4-fluorophenyl)-4-methyl-5-phenylfuran-3-yl)acetate (4o)**

Eluent: ethyl acetate/hexanes (5%); yellow liquid (97 mg, 78%); <sup>1</sup>H NMR (400 MHz, CDCl<sub>3</sub>) δ: 1.29 (t, *J* = 7.2 Hz, 3H), 2.30 (s, 3H), 3.45 (s, 2H), 4.19 (q, *J* = 7.2 Hz, 2H), 7.31 (d, *J* = 7.6 Hz, 1H), 7.37-7.50 (m, 4H), 7.70-7.73 (m, 3H). <sup>13</sup>C NMR (100 MHz, CDCl<sub>3</sub>) δ: 10.2, 14.2, 30.5, 61.1, 117.6, 118.8, 125.7, 126.9, 127.2, 127.6, 128.6, 128.7, 129.0, 131.4, 132.7, 132.8, 133.1, 135.3, 147.4, 149.0, 151.1, 160.6, 163.3, 171.0. HRMS calcd for C<sub>21</sub>H<sub>19</sub>BrFO<sub>3</sub>: 417.0496 [M+H]<sup>+</sup>, found: 417.0499.

**Ethyl 2-(5-(3,4-dimethoxyphenyl)-4-methyl-2-(2-(trifluoromethyl)phenyl)furan-3-yl)acetate (4p)**

Eluent: ethyl acetate/hexanes (10%); yellow solid (110 mg, 82%), mp 56-57 °C. <sup>1</sup>H NMR (400 MHz, CDCl<sub>3</sub>) δ: 1.28 (t, *J* = 7.2 Hz, 3H), 2.28 (s, 3H), 3.45 (s, 2H), 3.91 (s, 3H), 3.93 (s, 3H), 4.19 (q, *J* = 7.2 Hz, 2H), 6.93 (d, *J* = 8.4 Hz, 1H), 7.22 (d, *J* = 8.4 Hz, 1H), 7.30 (s, 1H), 7.51 (t, *J* = 7.6 Hz, 1H), 7.59-7.66 (m, 2H), 7.82 (d, *J* = 8.0 Hz, 1H). <sup>13</sup>C NMR (100 MHz, CDCl<sub>3</sub>) δ: 10.1, 14.1, 30.4, 55.7, 55.9, 61.0, 109.1, 111.2, 116.4, 118.3, 118.4, 124.6, 127.0, 127.1, 128.6, 128.9, 131.6, 131.8, 146.6, 148.3, 148.9, 149.1, 171.2. HRMS calcd for C<sub>24</sub>H<sub>24</sub>F<sub>3</sub>O<sub>5</sub>: 449.1570 [M+H]<sup>+</sup>, found: 449.1566.

**Ethyl 2-(5-(3,4-dimethoxyphenyl)-2-(4-fluorophenyl)-4-methylfuran-3-yl)acetate (4q)**

Eluent: ethyl acetate/hexanes (10%); yellow solid (84 mg, 70%), mp 78-90 °C. <sup>1</sup>H NMR (400 MHz, CDCl<sub>3</sub>) δ: 1.30 (t, *J* = 7.2 Hz, 3H), 2.27 (s, 3H), 3.60 (s, 2H), 3.94 (s, 3H), 3.97 (s, 3H), 4.23 (q, *J* = 7.2 Hz, 2H), 6.95 (d, *J* = 8.8 Hz, 1H), 7.15 (t, *J* = 8.8 Hz, 2H), 7.22-7.23 (m, 2H), 7.70-7.73 (m, 2H). <sup>13</sup>C NMR (100 MHz, CDCl<sub>3</sub>) δ: 9.9, 14.2, 30.8, 56.0, 61.1, 109.3, 111.3, 115.6, 115.8, 116.1, 117.4, 118.7, 124.6, 127.95, 128.03, 148.0, 148.1, 148.4, 149.0, 161.1, 163.4, 171.2. HRMS calcd for C<sub>23</sub>H<sub>24</sub>FO<sub>5</sub>: 399.1602 [M+H]<sup>+</sup>, found: 399.1605.

#### **Ethyl 2-(4-methyl-2,5-di(thiophen-2-yl)furan-3-yl)acetate (4r)**

Eluent: ethyl acetate/hexanes (5%); yellow liquid (48 mg, 48%); <sup>1</sup>H NMR (400 MHz, CDCl<sub>3</sub>) δ: 1.29 (t, *J* = 7.6 Hz, 3H), 2.26 (s, 3H), 3.65 (s, 2H), 4.21 (q, *J* = 7.2 Hz, 2H), 7.10-7.12 (m, 1H), 7.20-7.22 (m, 1H), 7.29-7.40 (m, 2H), 7.71-7.73 (m, 1H), 7.92-7.93 (m, 1H). <sup>13</sup>C NMR (100 MHz, CDCl<sub>3</sub>) δ: 9.5, 14.2, 30.7, 61.2, 116.2, 118.4, 123.1, 124.1, 124.2, 124.9, 127.4, 128.0, 133.2, 133.5, 143.0, 144.2, 170.7. HRMS calcd for C<sub>17</sub>H<sub>17</sub>O<sub>3</sub>S<sub>2</sub>: 333.0614 [M+H]<sup>+</sup>, found: 333.0616.

#### **Methyl 2-(4-methyl-2,5-diphenylfuran-3-yl)acetate (4s)**

Eluent: ethyl acetate/hexanes (5%); yellow liquid (57 mg, 62%); <sup>1</sup>H NMR (400 MHz, CDCl<sub>3</sub>) δ: 2.32 (s, 3H), 3.70 (s, 2H), 3.79 (s, 3H), 7.28-7.37 (m, 2H), 7.44-7.49 (m, 4H), 7.74 (t, *J* = 7.2 Hz, 4H). <sup>13</sup>C NMR (100 MHz, CDCl<sub>3</sub>) δ: 10.0, 30.6, 52.2, 116.3, 118.7, 125.7, 126.2, 126.9, 127.6, 128.5, 128.7, 131.0, 131.6, 148.0, 149.4, 171.7. HRMS calcd for C<sub>20</sub>H<sub>19</sub>O<sub>3</sub>: 307.1329 [M+H]<sup>+</sup>, found: 307.1333.

#### **Butyl 2-(4-methyl-2,5-diphenylfuran-3-yl)acetate (4t)**

Eluent: ethyl acetate/hexanes (5%); yellow liquid (44 mg, 42%); <sup>1</sup>H NMR (400 MHz, CDCl<sub>3</sub>) δ: 0.94 (t, *J* = 7.2 Hz, 3H), 1.37-1.43 (m, 2H), 1.59-1.69 (m, 2H), 2.31 (s, 3H), 3.67 (s, 2H), 4.18 (t, *J* = 6.8 Hz, 2H), 7.31-7.36 (m, 2H), 7.46 (t, *J* = 7.2 Hz, 4H), 7.73 (d, *J* = 8.0 Hz, 2H), 7.76 (d, *J* = 8.0 Hz, 2H). <sup>13</sup>C NMR (100 MHz, CDCl<sub>3</sub>) δ: 10.0, 13.7, 19.1, 30.6, 30.8, 65.0, 116.5, 118.8, 125.7, 126.2, 126.9, 127.5, 128.5, 128.7, 131.0, 131.7, 148.0, 149.4, 171.3. HRMS calcd for C<sub>23</sub>H<sub>25</sub>O<sub>3</sub>: 349.1798 [M+H]<sup>+</sup>, found: 349.1803.



**Hexyl 2-(4-methyl-2,5-diphenylfuran-3-yl)acetate (4u)**

Eluent: ethyl acetate/hexanes (5%); yellow liquid (45 mg, 40%);  $^1\text{H}$  NMR (400 MHz,  $\text{CDCl}_3$ )  $\delta$ : 0.88 (t,  $J = 6.8$  Hz, 3H), 1.26-1.37 (m, 6H), 1.65 (q,  $J = 6.8$  Hz, 2H), 2.31 (s, 3H), 3.67 (s, 2H), 4.17 (t,  $J = 7.2$  Hz, 2H), 7.31 (d,  $J = 7.2$  Hz, 1H), 7.35 (d,  $J = 7.2$  Hz, 1H), 7.45 (t,  $J = 7.2$  Hz, 4H), 7.72 (d,  $J = 8.0$  Hz, 2H), 7.76 (d,  $J = 8.0$  Hz, 2H).  $^{13}\text{C}$  NMR (100 MHz,  $\text{CDCl}_3$ )  $\delta$ : 10.0, 14.0, 22.5, 25.6, 28.6, 31.0, 31.4, 65.3, 116.5, 118.8, 125.7, 126.2, 126.9, 127.5, 128.5, 128.7, 131.0, 131.6, 148.0, 149.3, 171.3. HRMS calcd for  $\text{C}_{25}\text{H}_{29}\text{O}_3$ : 377.2111  $[\text{M}+\text{H}]^+$ , found: 377.2113.

**Benzyl 2-(4-methyl-2,5-diphenylfuran-3-yl)acetate (4v)**

Eluent: ethyl acetate/hexanes (5%); yellow liquid (57 mg, 50%);  $^1\text{H}$  NMR (400 MHz,  $\text{CDCl}_3$ )  $\delta$ : 2.27 (s, 3H), 3.72 (s, 2H), 5.23 (s, 2H), 7.29-7.47 (m, 11H), 7.71-7.74 (m, 4H).  $^{13}\text{C}$  NMR (100 MHz,  $\text{CDCl}_3$ )  $\delta$ : 10.0, 30.8, 66.9, 116.3, 118.7, 125.7, 126.2, 126.9, 127.6, 128.2, 128.3, 128.5, 128.6, 128.7, 130.9, 131.6, 135.8, 148.0, 149.5, 171.1. HRMS calcd for  $\text{C}_{26}\text{H}_{22}\text{O}_3\text{Na}$ : 405.1461  $[\text{M}+\text{Na}]^+$ , found: 405.1466.

**Allyl 2-(4-methyl-2,5-diphenylfuran-3-yl)acetate (4w)**

Eluent: ethyl acetate/hexanes (5%); yellow liquid (40 mg, 40%);  $^1\text{H}$  NMR (400 MHz,  $\text{CDCl}_3$ )  $\delta$ : 2.21 (s, 3H), 3.71 (s, 2H), 4.68 (d,  $J = 6.0$  Hz, 2H), 5.25-5.36 (m, 2H), 5.90-5.98 (m, 1H), 7.30-7.36 (m, 2H), 7.39-7.47 (m, 4H), 7.73 (t,  $J = 8.4$  Hz, 4H).  $^{13}\text{C}$  NMR (100 MHz,  $\text{CDCl}_3$ )  $\delta$ : 10.1, 30.8, 65.7, 116.3, 118.5, 118.7, 125.7, 126.2, 127.0, 127.6, 128.6, 128.7, 130.9, 131.6, 132.0, 148.0, 149.4, 170.9. HRMS calcd for  $\text{C}_{22}\text{H}_{21}\text{O}_3$ : 333.1485  $[\text{M}+\text{H}]^+$ , found: 333.1489.

***Tert*-butyl 2-(5-(3,4-dimethoxyphenyl)-4-methyl-2-(2-(trifluoromethyl)phenyl)furan-3-yl)acetate (4x)**

Eluent: ethyl acetate/hexanes (10%); yellow liquid (40 mg, 28%);  $^1\text{H}$  NMR (400 MHz,  $\text{CDCl}_3$ )  $\delta$ : 1.22 (s, 9H), 2.32 (s, 3H), 3.94 (s, 6H), 4.96 (s, 2H), 6.94 (d,  $J = 8.4$  Hz, 1H), 7.24 (d,  $J = 8.4$  Hz, 1H), 7.30 (s, 1H), 7.53-7.57 (m, 2H), 7.62 (d,  $J = 7.2$  Hz, 1H), 7.83 (d,  $J = 8.0$  Hz, 1H).  $^{13}\text{C}$  NMR (100 MHz,  $\text{CDCl}_3$ )

$\delta$ : 9.8, 27.1, 38.9, 55.8, 55.9, 57.3, 109.0, 109.1, 111.2, 116.3, 118.3, 120.3, 122.5, 124.4, 127.0, 127.1, 128.5, 128.9, 131.6, 131.9, 148.0, 148.4, 149.1, 149.2, 178.4. HRMS calcd for  $C_{26}H_{28}F_3O_5$ : 477.1883  $[M+H]^+$ , found: 477.1886.

#### **Ethyl 2-(2,5-diphenylfuran-3-yl)acetate (6a)**

Eluent: ethyl acetate/hexanes (5%); yellow liquid (55 mg, 60%);  $^1H$  NMR (400 MHz,  $CDCl_3$ )  $\delta$ : 1.30 (t,  $J$  = 6.8 Hz, 3H), 3.71 (s, 2H), 4.21-4.24 (m, 2H), 6.81 (s, 1H), 7.28-7.49 (m, 6H), 7.72-7.76 (m, 4H).  $^{13}C$  NMR (100 MHz,  $CDCl_3$ )  $\delta$ : 14.2, 32.3, 61.1, 109.4, 115.6, 123.8, 126.1, 127.5, 127.6, 128.7, 130.8, 149.8, 152.5, 171.2. HRMS calcd for  $C_{20}H_{19}O_3$ : 307.1329  $[M+H]^+$ , found: 307.1333.

#### **Ethyl 2-(2-phenyl-5-*o*-tolylfuran-3-yl)acetate (6b)**

Eluent: ethyl acetate/hexanes (5%); yellow liquid (42 mg, 44%);  $^1H$  NMR (400 MHz,  $CDCl_3$ )  $\delta$ : 1.31 (t,  $J$  = 6.8 Hz, 3H), 2.59 (s, 3H), 3.73 (s, 2H), 4.24 (q,  $J$  = 6.8 Hz, 2H), 6.70 (s, 1H), 7.23-7.37 (m, 4H), 7.45-7.49 (m, 2H), 7.73 (d,  $J$  = 7.6 Hz, 2H), 7.80 (d,  $J$  = 7.6 Hz, 1H).  $^{13}C$  NMR (100 MHz,  $CDCl_3$ )  $\delta$ : 14.2, 22.1, 32.3, 61.1, 112.9, 115.3, 126.0, 126.1, 126.9, 127.5, 127.6, 128.7, 129.8, 130.9, 131.3, 134.6, 149.5, 152.2, 171.2. HRMS calcd for  $C_{21}H_{21}O_3$ : 321.1485  $[M+H]^+$ , found: 321.1482.

#### **Ethyl 2-(5-(2-fluorophenyl)-2-phenylfuran-3-yl)acetate (6c)**

Eluent: ethyl acetate/hexanes (5%); yellow liquid (39 mg, 40%);  $^1H$  NMR (400 MHz,  $CDCl_3$ )  $\delta$ : 1.30 (t,  $J$  = 7.2 Hz, 3H), 3.72 (s, 2H), 4.23 (q,  $J$  = 7.2 Hz, 2H), 6.98 (d,  $J$  = 3.6 Hz, 1H), 7.12-7.28 (m, 2H), 7.36 (t,  $J$  = 7.6 Hz, 1H), 7.48 (t,  $J$  = 7.6 Hz, 2H), 7.74 (d,  $J$  = 7.2 Hz, 2H), 7.90-7.93 (m, 1H).  $^{13}C$  NMR (100 MHz,  $CDCl_3$ )  $\delta$ : 13.2, 31.2, 60.1, 113.5, 113.6, 114.8, 114.9, 115.0, 117.8, 117.9, 123.26, 123.29, 124.89, 124.91, 125.2, 126.8, 127.3, 127.4, 127.70, 127.74, 129.6, 145.59, 145.60, 148.8, 156.9, 158.6, 170.0. HRMS calcd for  $C_{20}H_{18}FO_3$ : 325.1234  $[M+H]^+$ , found: 325.1236.

#### **Ethyl 2-(2-phenyl-5-*p*-tolylfuran-3-yl)acetate (6d)**

Eluent: ethyl acetate/hexanes (5%); yellow liquid (53 mg, 55%);  $^1\text{H}$  NMR (400 MHz,  $\text{CDCl}_3$ )  $\delta$ : 1.30 (t,  $J = 6.8$  Hz, 3H), 2.39 (s, 3H), 3.70 (s, 2H), 4.23 (q,  $J = 6.8$  Hz, 2H), 6.74 (s, 1H), 7.22 (d,  $J = 8.0$  Hz, 2H), 7.34 (t,  $J = 7.2$  Hz, 1H), 7.46 (t,  $J = 8.0$  Hz, 2H), 7.64 (d,  $J = 8.0$  Hz, 2H), 7.72 (d,  $J = 7.2$  Hz, 2H).  $^{13}\text{C}$  NMR (100 MHz,  $\text{CDCl}_3$ )  $\delta$ : 14.2, 21.3, 32.3, 61.1, 108.7, 115.6, 123.8, 126.1, 127.5, 127.9, 128.7, 129.4, 130.9, 137.4, 149.4, 152.7, 171.2. HRMS calcd for  $\text{C}_{21}\text{H}_{21}\text{O}_3$ : 321.1485  $[\text{M}+\text{H}]^+$ , found: 321.1489.

**Ethyl 2-(5-(4-chlorophenyl)-2-phenylfuran-3-yl)acetate (6e)**

Eluent: ethyl acetate/hexanes (5%); yellow liquid (51 mg, 50%);  $^1\text{H}$  NMR (400 MHz,  $\text{CDCl}_3$ )  $\delta$ : 1.30 (t,  $J = 7.2$  Hz, 3H), 3.70 (s, 2H), 4.23 (q,  $J = 7.2$  Hz, 2H), 6.79 (s, 1H), 7.34-7.39 (m, 3H), 7.47 (t,  $J = 8.0$  Hz, 2H), 7.65-7.72 (m, 4H).  $^{13}\text{C}$  NMR (100 MHz,  $\text{CDCl}_3$ )  $\delta$ : 14.2, 32.2, 61.2, 109.9, 115.8, 125.0, 126.2, 127.8, 128.9, 129.0, 129.2, 130.6, 133.1, 150.2, 151.4, 171.1. HRMS calcd for  $\text{C}_{20}\text{H}_{18}\text{ClO}_3$ : 341.0939  $[\text{M}+\text{H}]^+$ , found: 341.0937.

**Ethyl 2-(5-(naphthalen-1-yl)-2-phenylfuran-3-yl)acetate (6f)**

Eluent: ethyl acetate/hexanes (5%); yellow liquid (69 mg, 65%);  $^1\text{H}$  NMR (400 MHz,  $\text{CDCl}_3$ )  $\delta$ : 1.33 (t,  $J = 7.2$  Hz, 3H), 3.79 (s, 2H), 4.27 (m, 2H), 6.91 (s, 1H), 7.37 (t,  $J = 7.2$  Hz, 1H), 7.48-7.59 (m, 5H), 7.78 (d,  $J = 8.0$  Hz, 2H), 7.84-7.93 (m, 3H), 8.55 (d,  $J = 8.4$  Hz, 1H).  $^{13}\text{C}$  NMR (100 MHz,  $\text{CDCl}_3$ )  $\delta$ : 14.3, 32.3, 61.2, 113.7, 115.4, 125.4, 125.6, 126.0, 126.1, 126.2, 126.7, 127.7, 128.2, 128.61, 128.64, 128.8, 130.2, 130.9, 134.0, 150.3, 152.1, 171.2. HRMS calcd for  $\text{C}_{24}\text{H}_{21}\text{O}_3$ : 357.1485  $[\text{M}+\text{H}]^+$ , found: 357.1489.

**Ethyl 2-(2-phenyl-5-(thiophen-2-yl)furan-3-yl)acetate (6g)**

Eluent: ethyl acetate/hexanes (5%); yellow liquid (59 mg, 63%);  $^1\text{H}$  NMR (400 MHz,  $\text{CDCl}_3$ )  $\delta$ : 1.30 (t,  $J = 7.2$  Hz, 3H), 3.68 (s, 2H), 4.23 (q,  $J = 7.2$  Hz, 2H), 6.65 (s, 1H), 7.06-7.08 (m, 1H), 7.25-7.28 (m, 1H), 7.32-7.36 (m, 2H), 7.46 (t,  $J = 7.6$  Hz, 2H), 7.69 (dd,  $J_1 = 7.6$  Hz,  $J_2 = 1.2$  Hz, 2H).  $^{13}\text{C}$  NMR (100 MHz,  $\text{CDCl}_3$ )  $\delta$ : 14.2, 32.2, 61.1, 109.3, 115.6, 122.8, 124.3, 126.2, 127.7, 128.7, 130.5, 133.5, 148.2, 149.4, 171.0. HRMS calcd for  $\text{C}_{18}\text{H}_{17}\text{O}_3\text{S}$ : 313.0893  $[\text{M}+\text{H}]^+$ , found: 313.0892.

### **Ethyl 2-(2-(4-methoxyphenyl)-5-phenylfuran-3-yl)acetate (6h)**

Eluent: ethyl acetate/hexanes (5%); yellow liquid (50 mg, 50%);  $^1\text{H}$  NMR (400 MHz,  $\text{CDCl}_3$ )  $\delta$ : 1.30 (t,  $J = 6.8$  Hz, 3H), 3.66 (s, 2H), 3.88 (s, 3H), 4.23 (q,  $J = 6.8$  Hz, 2H), 6.77 (s, 1H), 7.36-7.42 (m, 3H), 7.47-7.52 (m, 2H), 7.66 (d,  $J = 8.8$  Hz, 2H), 7.72 (d,  $J = 7.6$  Hz, 2H).  $^{13}\text{C}$  NMR (100 MHz,  $\text{CDCl}_3$ )  $\delta$ : 14.2, 32.2, 55.4, 61.1, 109.3, 114.2, 123.7, 124.8, 126.3, 127.7, 128.0, 128.7, 129.5, 130.8, 151.9, 159.3, 171.4. HRMS calcd for  $\text{C}_{21}\text{H}_{21}\text{O}_4$ : 337.1434  $[\text{M}+\text{H}]^+$ , found: 337.1436.

### **Ethyl 2-(2-(4-chlorophenyl)-5-phenylfuran-3-yl)acetate (6i)**

Eluent: ethyl acetate/hexanes (5%); yellow liquid (63 mg, 62%);  $^1\text{H}$  NMR (400 MHz,  $\text{CDCl}_3$ )  $\delta$ : 1.30 (t,  $J = 7.2$  Hz, 3H), 3.67 (s, 2H), 4.23 (q,  $J = 7.2$  Hz, 2H), 6.79 (s, 1H), 7.27-7.44 (m, 5H), 7.66 (d,  $J = 8.4$  Hz, 2H), 7.73 (d,  $J = 7.6$  Hz, 2H).  $^{13}\text{C}$  NMR (100 MHz,  $\text{CDCl}_3$ )  $\delta$ : 14.2, 32.3, 61.2, 109.5, 116.1, 123.9, 127.3, 127.7, 128.5, 128.6, 128.7, 128.9, 133.4, 152.8, 154.3, 171.0. HRMS calcd for  $\text{C}_{20}\text{H}_{18}\text{ClO}_3$ : 341.0939  $[\text{M}+\text{H}]^+$ , found: 341.0945.

### **Ethyl 2-(2,5-diphenylfuran-3-yl)-2-phenylacetate (6j)**

Eluent: ethyl acetate/hexanes (10%); yellow liquid (55 mg, 48%);  $^1\text{H}$  NMR (400 MHz,  $\text{CDCl}_3$ )  $\delta$ : 1.30 (t,  $J = 7.6$  Hz, 3H), 4.23 (s, 1H), 4.27 (q,  $J = 7.2$  Hz, 2H), 7.31-7.38 (m, 5H), 7.49 (s, 1H), 7.50-7.53 (m, 3H), 7.57-7.61 (m, 2H), 7.98 (d,  $J = 8.0$  Hz, 2H), 8.03-8.07 (m, 3H).  $^{13}\text{C}$  NMR (100 MHz,  $\text{CDCl}_3$ )  $\delta$ : 14.2, 38.7, 61.0, 108.1, 115.7, 128.3, 128.4, 128.6, 128.7, 128.8, 128.9, 130.1, 132.0, 133.4, 135.3, 136.2, 138.3, 142.0, 144.0, 167.5. HRMS calcd for  $\text{C}_{26}\text{H}_{23}\text{O}_3$ : 383.1642  $[\text{M}+\text{H}]^+$ , found: 383.1635.

## **2. Procedure for the preparation of 2-(4-methyl-2,5-diphenylfuran-3-yl)acetic acid (7a)**

To a flask containing ethyl 2-(4-methyl-2,5-diphenylfuran-3-yl)acetate (**4a**, 0.2 mmol) in  $\text{CH}_3\text{OH}/\text{H}_2\text{O}$  (1 mL, v/v = 1:1) was added KOH (0.4 mmol). After the mixture was stirred at 60 °C under air for 4 h, the reaction was quenched with aqueous HCl (2%) and extracted with ethyl acetate (5 mL  $\times$  3). The combined organic layers were washed with water and brine, and then dried over anhydrous  $\text{Na}_2\text{SO}_4$ . The

solvent was evaporated under vacuum and the crude product was purified by column chromatography on silica-gel to afford **7a** in 92% yield. **7b-7d** were prepared in a similar manner.

#### **2-(4-Methyl-2,5-diphenylfuran-3-yl)acetic acid (7a)**

Eluent: ethyl acetate/hexanes (20%); white solid (54 mg, 92%), mp 167-169 °C. <sup>1</sup>H NMR (400 MHz, CDCl<sub>3</sub>) δ: 2.32 (s, 3H), 3.73 (s, 2H), 7.29-7.37 (m, 2H), 7.44 (d, *J* = 7.6 Hz, 2H), 7.48 (d, *J* = 7.6 Hz, 2H), 7.71-7.75 (m, 4H). <sup>13</sup>C NMR (100 MHz, CDCl<sub>3</sub>) δ: 10.0, 30.5, 115.6, 118.6, 125.7, 126.2, 127.0, 127.7, 128.6, 128.8, 130.7, 131.5, 148.2, 149.6, 171.8. HRMS calcd for C<sub>19</sub>H<sub>17</sub>O<sub>3</sub>: 293.1172 [M+H]<sup>+</sup>, found: 293.1174.

#### **2-(2-(4-Methoxyphenyl)-4-methyl-5-phenylfuran-3-yl)acetic acid (7b)**

Eluent: ethyl acetate/hexanes (20%); white solid (58 mg, 90%), mp 173-175 °C. <sup>1</sup>H NMR (400 MHz, CDCl<sub>3</sub>) δ: 2.29 (s, 3H), 3.66 (s, 2H), 3.85 (s, 3H), 6.99 (d, *J* = 8.4 Hz, 2H), 7.27-7.30 (m, 1H), 7.43 (t, *J* = 7.6 Hz, 2H), 7.65-7.70 (m, 4H). <sup>13</sup>C NMR (100 MHz, CDCl<sub>3</sub>) δ: 10.0, 31.0, 55.3, 114.2, 118.5, 123.6, 125.6, 126.8, 127.7, 128.5, 131.6, 147.5, 149.7, 159.2, 168.5. HRMS calcd for C<sub>20</sub>H<sub>19</sub>O<sub>4</sub>: 323.1278 [M+H]<sup>+</sup>, found: 323.1282.

#### **2-(4-Methyl-2-phenyl-5-*o*-tolylfuran-3-yl)acetic acid (7c)**

Eluent: ethyl acetate/hexanes (20%); white solid (56 mg, 91%), mp 161-162 °C. <sup>1</sup>H NMR (400 MHz, CDCl<sub>3</sub>) δ: 2.11 (s, 3H), 2.45 (s, 3H), 3.74 (s, 2H), 7.28-7.35 (m, 4H), 7.39-7.47 (m, 3H), 7.71 (d, *J* = 7.6 Hz, 2H). <sup>13</sup>C NMR (100 MHz, CDCl<sub>3</sub>) δ: 9.5, 20.7, 30.8, 114.5, 119.4, 125.5, 126.0, 127.5, 128.3, 128.7, 130.0, 130.4, 130.7, 130.9, 137.6, 149.2, 149.8, 177.5. HRMS calcd for C<sub>20</sub>H<sub>19</sub>O<sub>3</sub>: 307.1329 [M+H]<sup>+</sup>, found: 307.1336.

#### **2-(2,5-Diphenylfuran-3-yl)acetic acid (7d)**

Eluent: ethyl acetate/hexanes (20%); white solid (49 mg, 88%), mp 157-159 °C. <sup>1</sup>H NMR (400 MHz, CDCl<sub>3</sub>) δ: 3.74 (s, 2H), 6.79 (s, 1H), 7.28-7.47 (m, 6H), 7.71 (t, *J* = 8.4 Hz, 4H). <sup>13</sup>C NMR (100 MHz,

CDCl<sub>3</sub>)  $\delta$ : 31.0, 109.3, 123.8, 126.2, 127.5, 127.7, 128.7, 128.8, 130.4, 130.6, 142.8, 152.7, 159.8, 168.8.

HRMS calcd for C<sub>18</sub>H<sub>15</sub>O<sub>3</sub>: 279.1016 [M+H]<sup>+</sup>, found: 279.1019.

### 3. Procedure for the preparation of 3-methyl-2-phenylnaphtho[1,2-*b*]furan-5-ol (**8a**)

To a flask containing 2-(4-methyl-2,5-diphenylfuran-3-yl)acetic acid (**7a**, 0.15 mmol) in CH<sub>2</sub>Cl<sub>2</sub> (0.5 mL) was added TFAA (0.9 mmol) and TfOH (0.2 mmol). Then, the mixture was stirred at room temperature under air for 2 h. Upon completion, the reaction was quenched with aqueous NaHCO<sub>3</sub> and extracted with ethyl acetate (3 mL  $\times$  3). The combined organic layers were washed with water and brine, and then dried over anhydrous Na<sub>2</sub>SO<sub>4</sub>. The solvent was evaporated under vacuum and the crude product was purified by column chromatography on silica-gel to afford **8a** in 63% yield. **8b-8d** were prepared in a similar manner.

#### 3-Methyl-2-phenylnaphtho[1,2-*b*]furan-5-ol (**8a**)

Eluent: ethyl acetate/hexanes (20%); yellow solid (26 mg, 63%), mp 137-139 °C. <sup>1</sup>H NMR (400 MHz, CDCl<sub>3</sub>)  $\delta$ : 2.52 (s, 3H), 5.24 (s, 1H), 6.96 (s, 1H), 7.28-7.42 (m, 1H), 7.52 (t, *J* = 8.0 Hz, 3H), 7.61-7.64 (m, 1H), 7.89 (dd, *J*<sub>1</sub> = 7.6 Hz, *J*<sub>2</sub> = 1.2 Hz, 2H), 8.26 (d, *J* = 8.4 Hz, 1H), 8.34 (dd, *J*<sub>1</sub> = 8.4 Hz, *J*<sub>2</sub> = 0.8 Hz, 1H). <sup>13</sup>C NMR (100 MHz, CDCl<sub>3</sub>)  $\delta$ : 9.7, 99.7, 112.3, 120.1, 122.7, 124.4, 125.8, 126.36, 126.40, 126.8, 127.5, 128.6, 128.7, 131.7, 144.5, 147.6, 150.5. MS: *m/z* 273 [MH]<sup>+</sup>.

#### 7-Methoxy-3-methyl-2-phenylnaphtho[1,2-*b*]furan-5-ol (**8b**)

Eluent: ethyl acetate/hexanes (20%); yellow solid (32 mg, 71%), mp 147-149 °C. <sup>1</sup>H NMR (400 MHz, CDCl<sub>3</sub>)  $\delta$ : 2.50 (s, 3H), 3.99 (s, 3H), 5.38 (s, 1H), 6.95 (s, 1H), 7.30-7.38 (m, 2H), 7.51 (t, *J* = 7.6 Hz, 2H), 7.59 (d, *J* = 2.4 Hz, 1H), 7.86 (d, *J* = 8.0 Hz, 2H), 8.25 (d, *J* = 8.8 Hz, 1H). <sup>13</sup>C NMR (100 MHz, CDCl<sub>3</sub>)  $\delta$ : 9.8, 31.0, 55.4, 100.3, 102.0, 112.2, 116.9, 119.0, 121.9, 124.1, 124.3, 126.2, 127.3, 128.6, 131.8, 144.9, 146.9, 149.7, 157.0. MS: *m/z* 303 [MH]<sup>+</sup>.

#### 3-Methyl-2-*o*-tolyl-naphtho[1,2-*b*]furan-5-ol (**8c**)

Eluent: ethyl acetate/hexanes (20%); yellow solid (27 mg, 62%), mp 135-136 °C. <sup>1</sup>H NMR (400 MHz, CDCl<sub>3</sub>) δ: 2.29 (s, 3H), 2.46 (s, 3H), 5.32 (s, 1H), 6.99 (s, 1H), 7.31-7.38 (m, 3H), 7.47-7.53 (m, 2H), 7.61 (t, *J* = 8.0 Hz, 1H), 8.27 (d, *J* = 8.4 Hz, 2H). <sup>13</sup>C NMR (100 MHz, CDCl<sub>3</sub>) δ: 9.1, 20.5, 100.0, 113.2, 120.0, 121.7, 122.68, 122.75, 124.3, 125.0, 125.6, 126.8, 128.8, 128.9, 130.5, 130.7, 138.1, 144.9, 147.4, 151.8. MS: m/z 287 [MH]<sup>+</sup>.

### **2-Phenylnaphtho[1,2-*b*]furan-5-ol (8d)**

Eluent: ethyl acetate/hexanes (20%); yellow solid (18 mg, 47%), mp 118-120 °C. <sup>1</sup>H NMR (400 MHz, CDCl<sub>3</sub>) δ: 5.23 (br s, 1H), 7.00 (s, 1H), 7.07 (s, 1H), 7.35-7.56 (m, 4H), 7.65 (t, *J* = 8.0 Hz, 1H), 7.93 (d, *J* = 7.6 Hz, 2H), 8.26 (d, *J* = 8.4 Hz, 1H), 8.36 (d, *J* = 8.4 Hz, 1H). <sup>13</sup>C NMR (100 MHz, CDCl<sub>3</sub>) δ: 101.1, 102.3, 120.0, 122.8, 124.3, 124.5, 124.6, 127.0, 128.2, 128.7, 128.8, 128.9, 130.9, 145.7, 147.9, 155.4. MS: m/z 259 [MH]<sup>+</sup>.

#### IV. Copies of $^1\text{H}$ and $^{13}\text{C}$ NMR spectra of 4a-4x

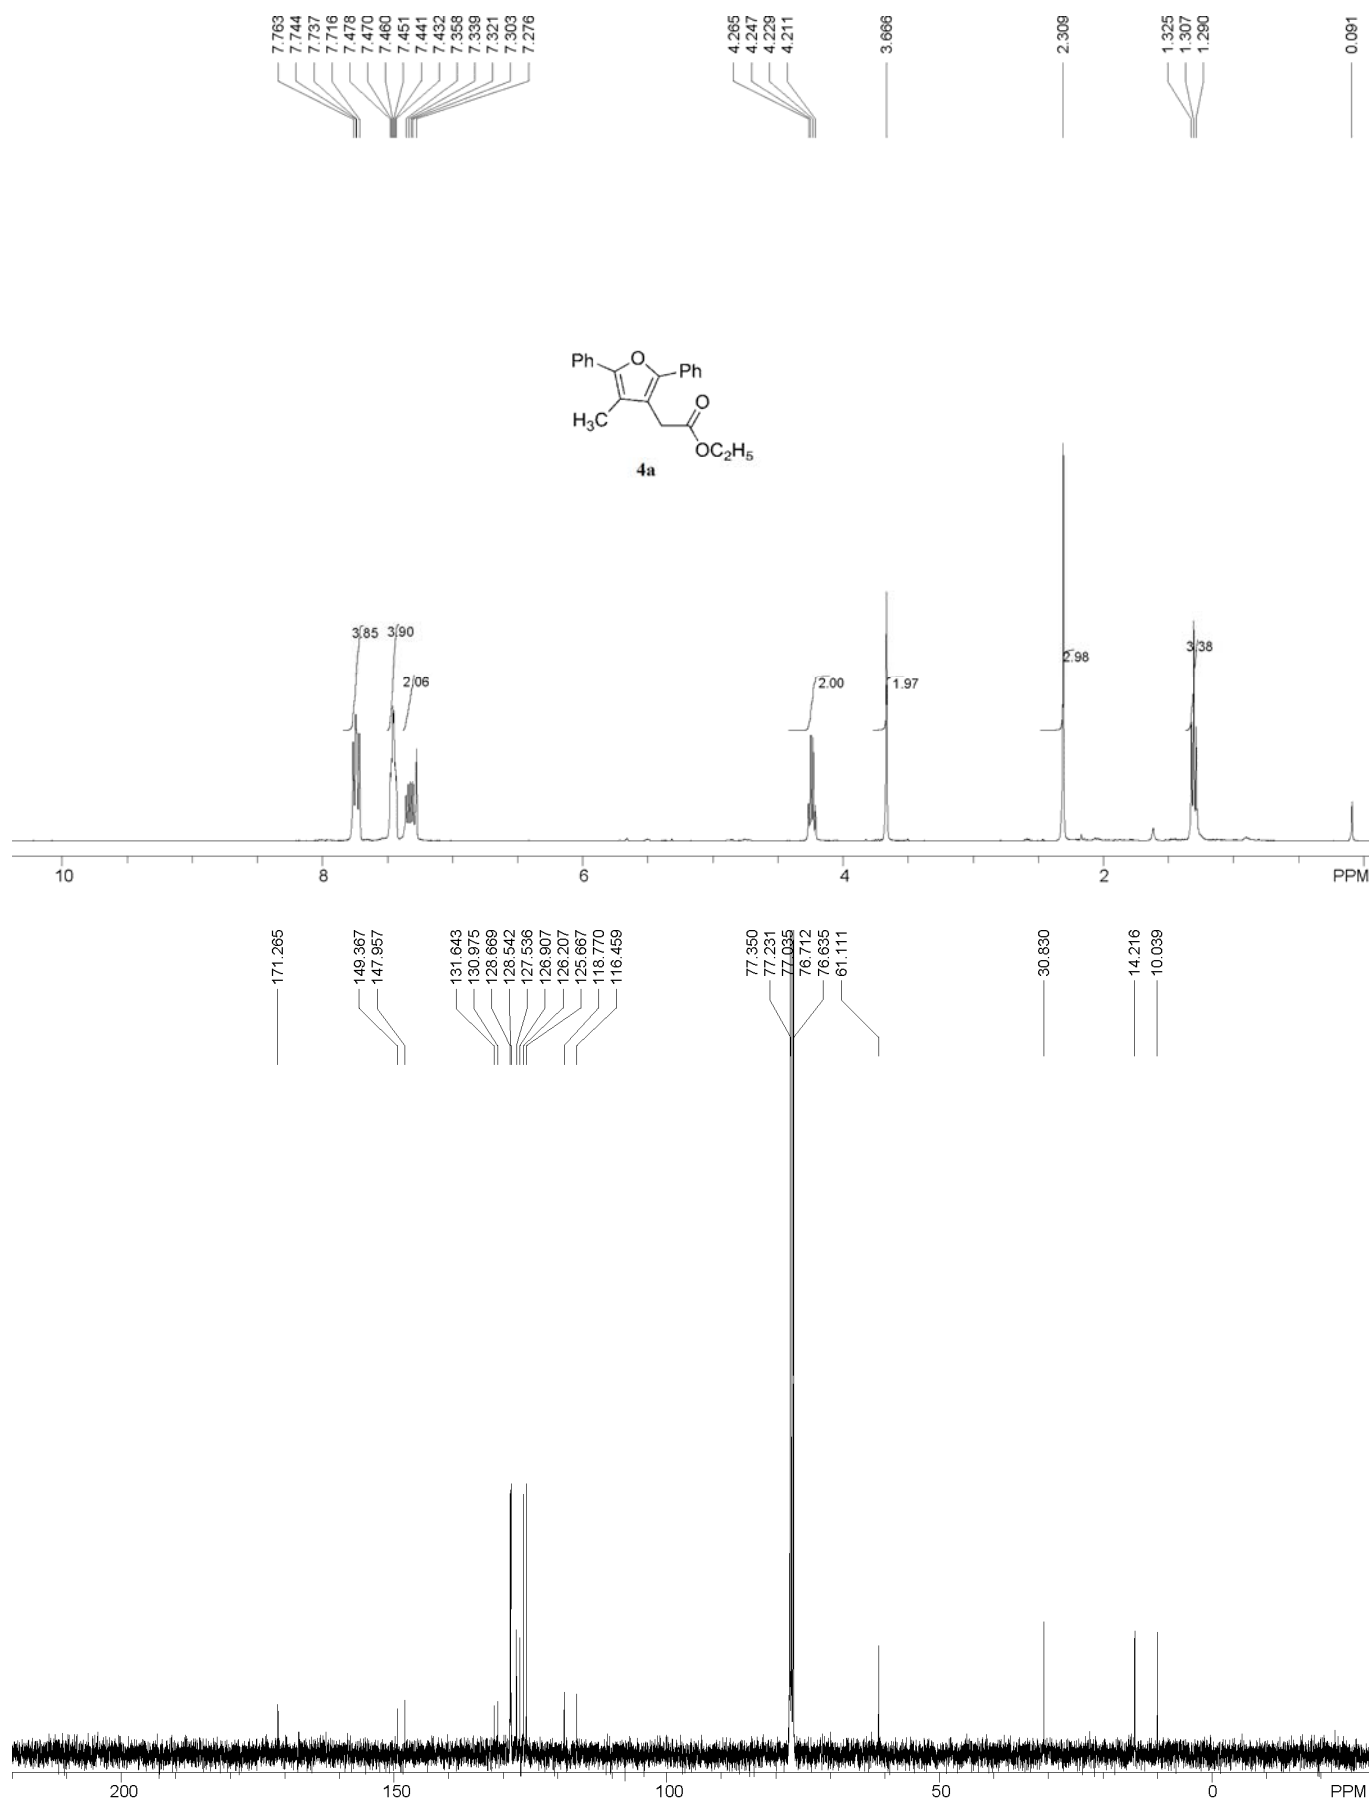



7.768  
7.750  
7.485  
7.467  
7.447  
7.441  
7.424  
7.419  
7.359  
7.340  
7.326  
7.322  
7.311  
7.304  
7.295

4.305  
4.287  
4.270  
4.252

3.704

2.472

2.125

1.362  
1.345  
1.327

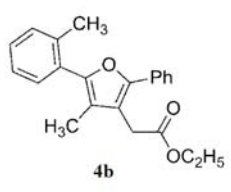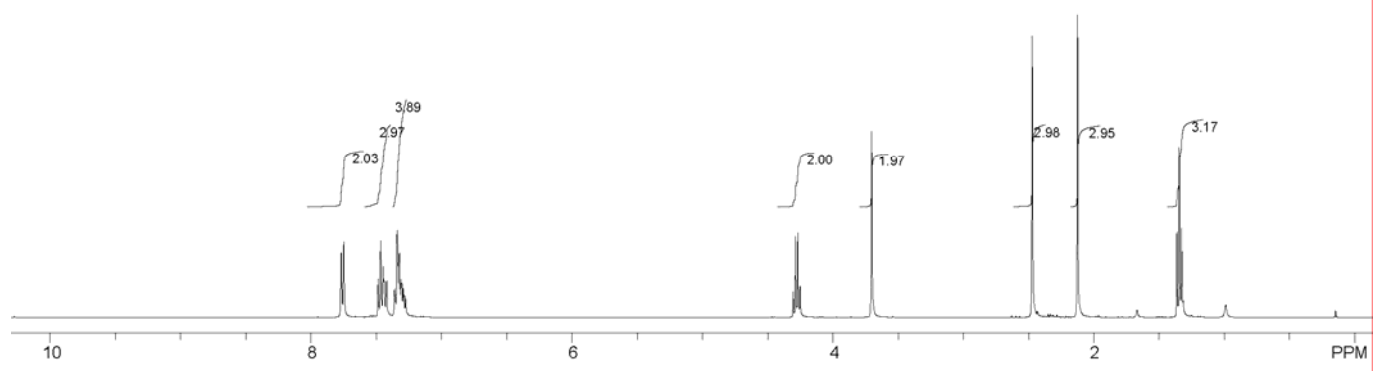

171.285  
149.552  
149.049  
131.188  
137.612  
130.702  
130.575  
130.038  
128.644  
128.270  
127.359  
126.030  
125.470  
119.425  
115.347  
77.387  
77.050  
76.730  
61.014  
31.041  
20.614  
14.216  
9.461

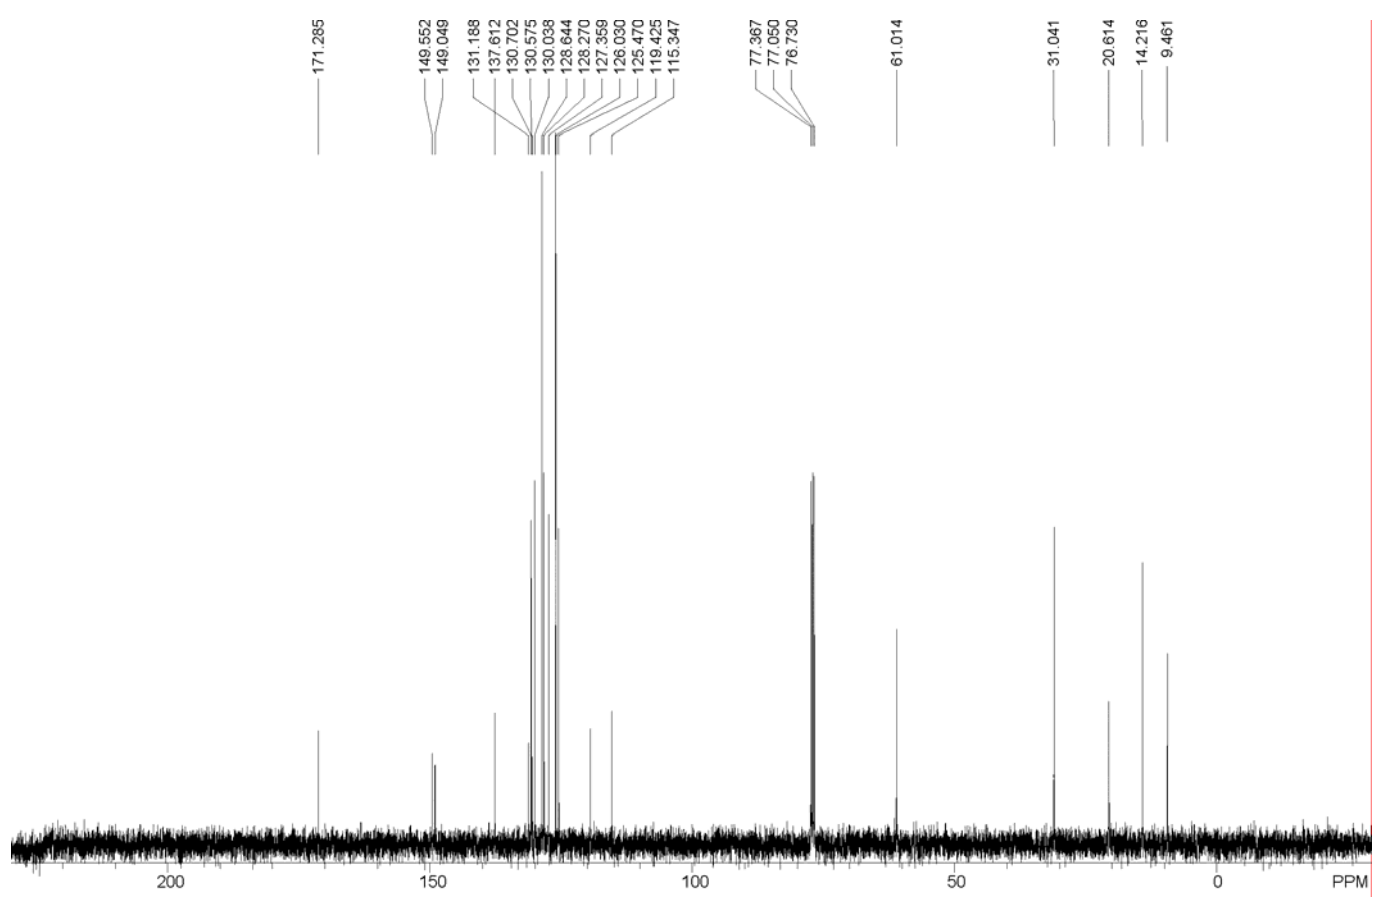

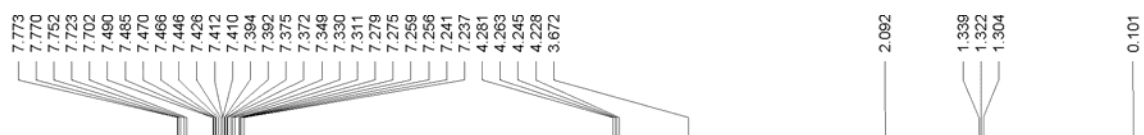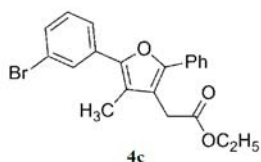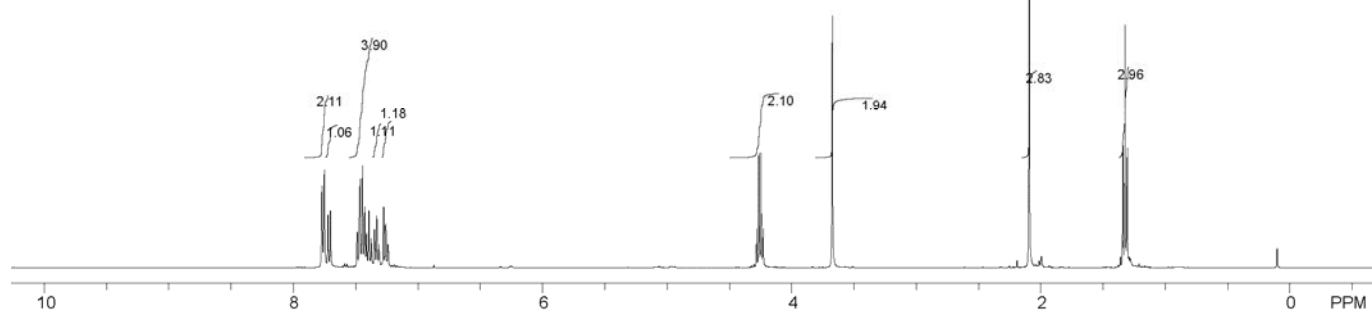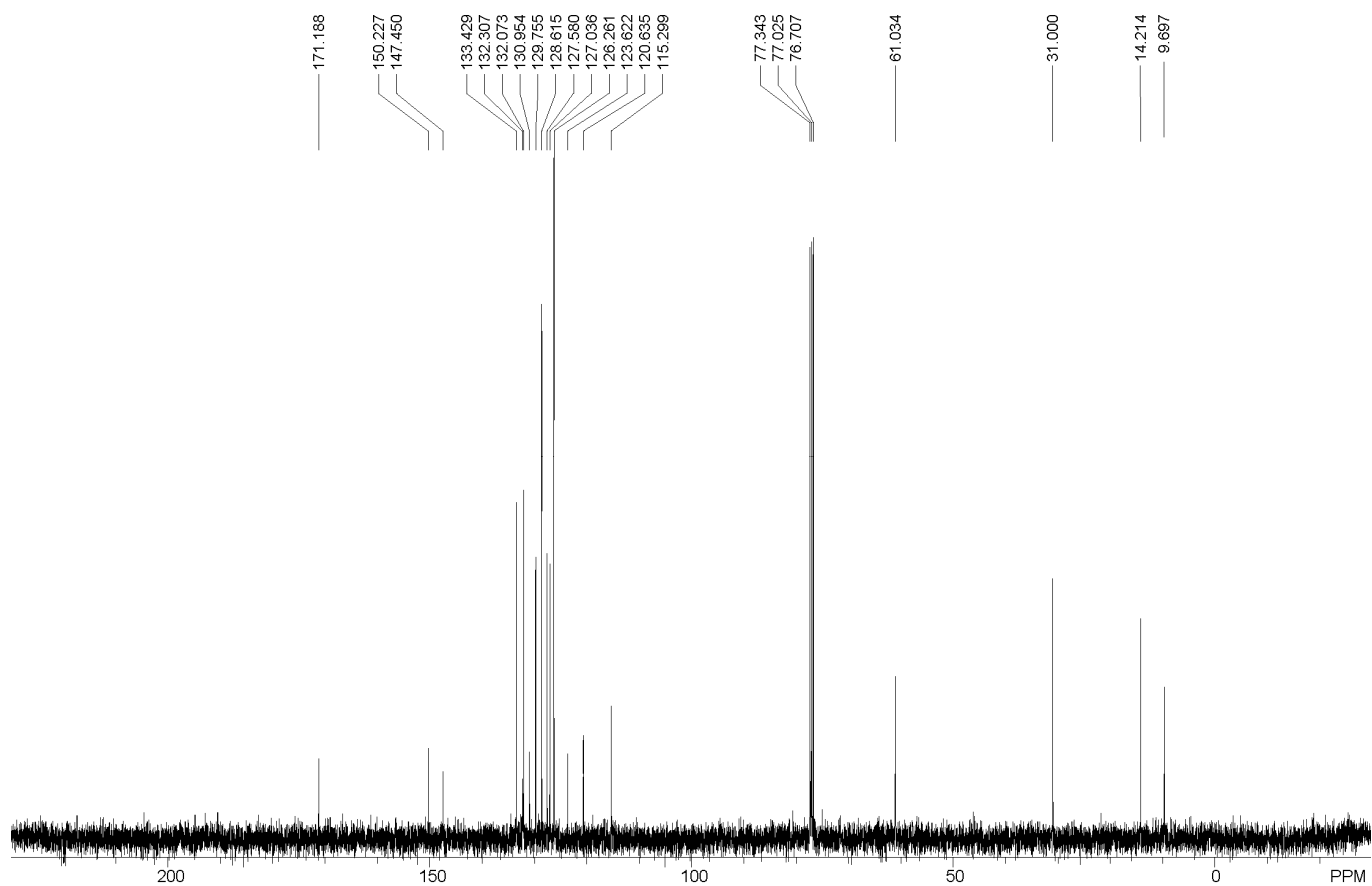

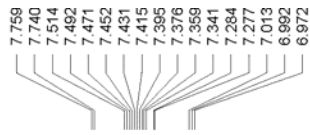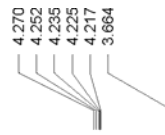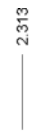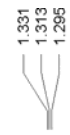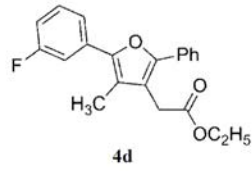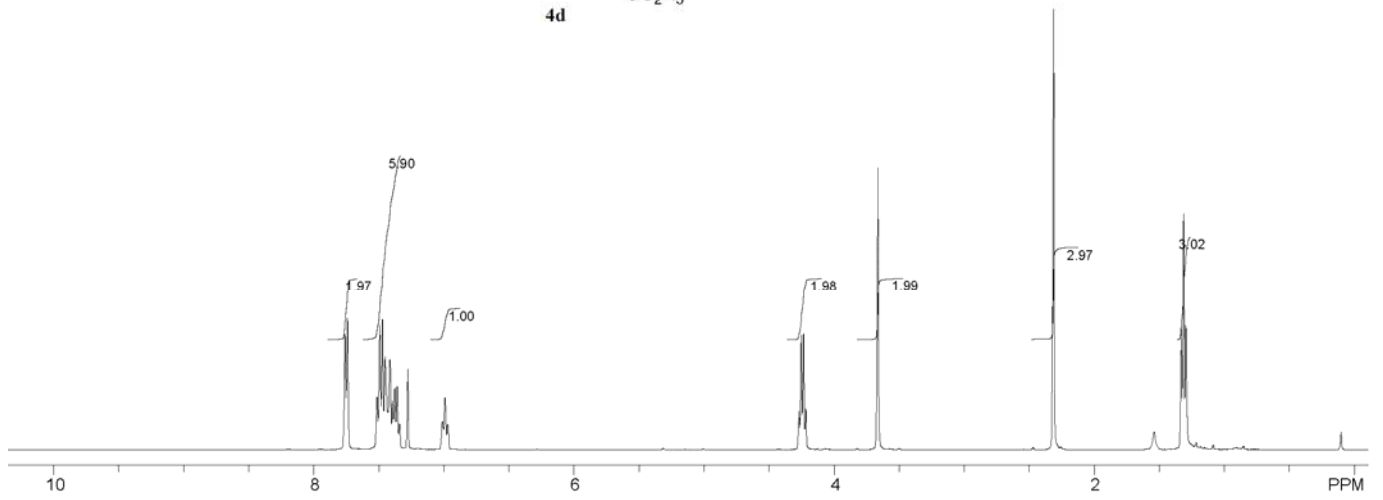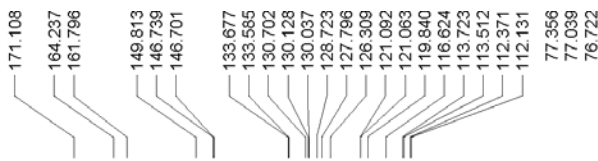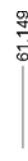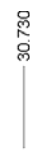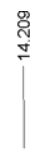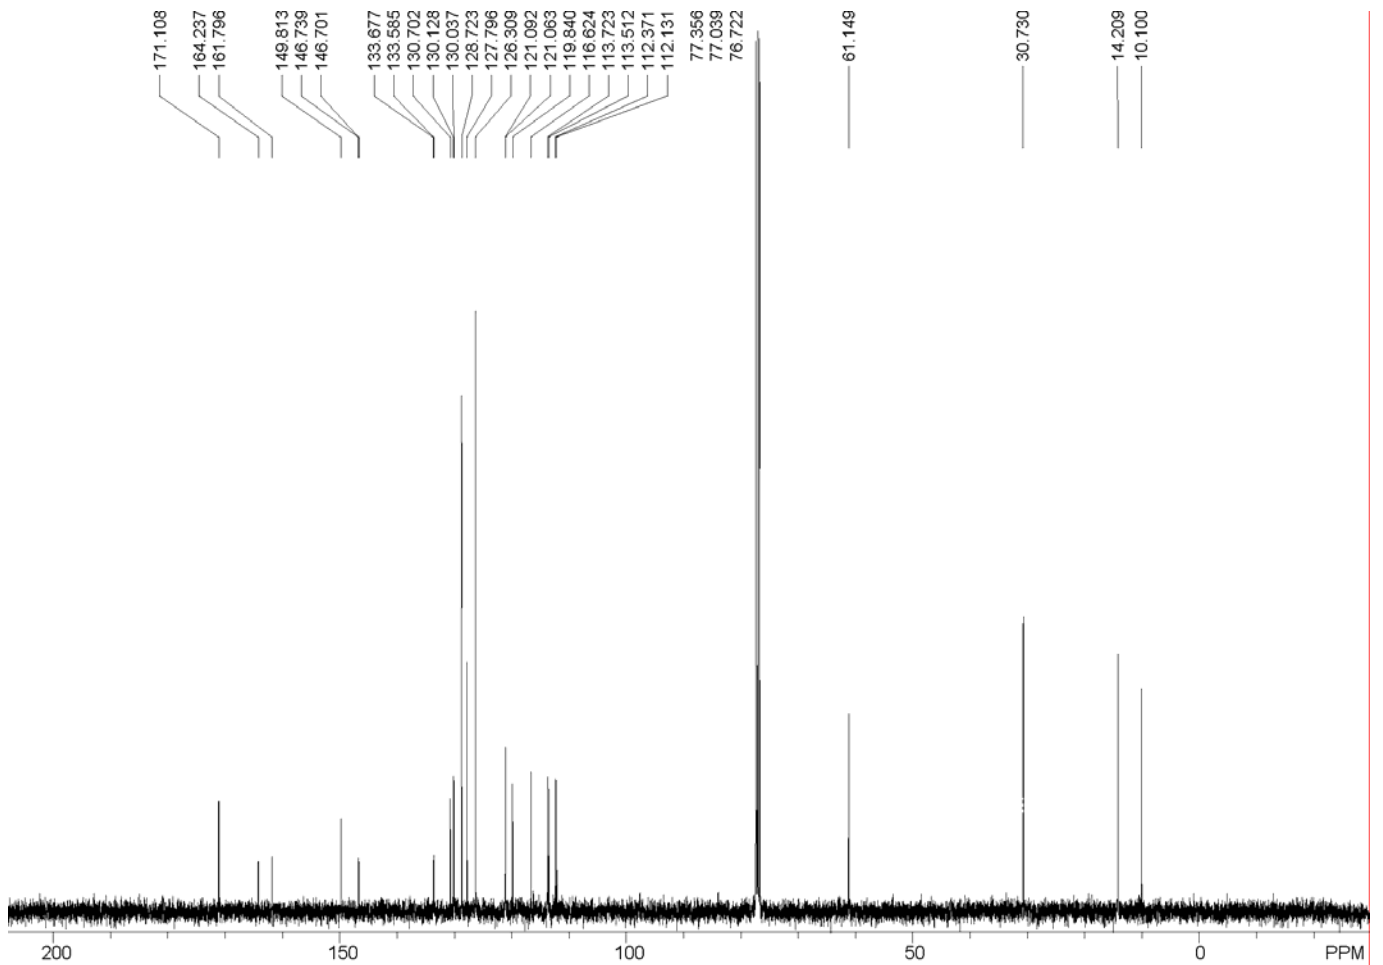

7.834  
7.814  
7.764  
7.761  
7.743  
7.689  
7.679  
7.499  
7.480  
7.460  
7.392  
7.373  
7.275

4.275  
4.257  
4.240  
4.221

3.671

2.336

1.334  
1.316  
1.299

0.100

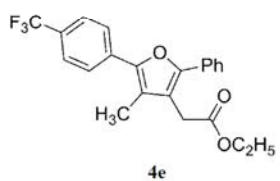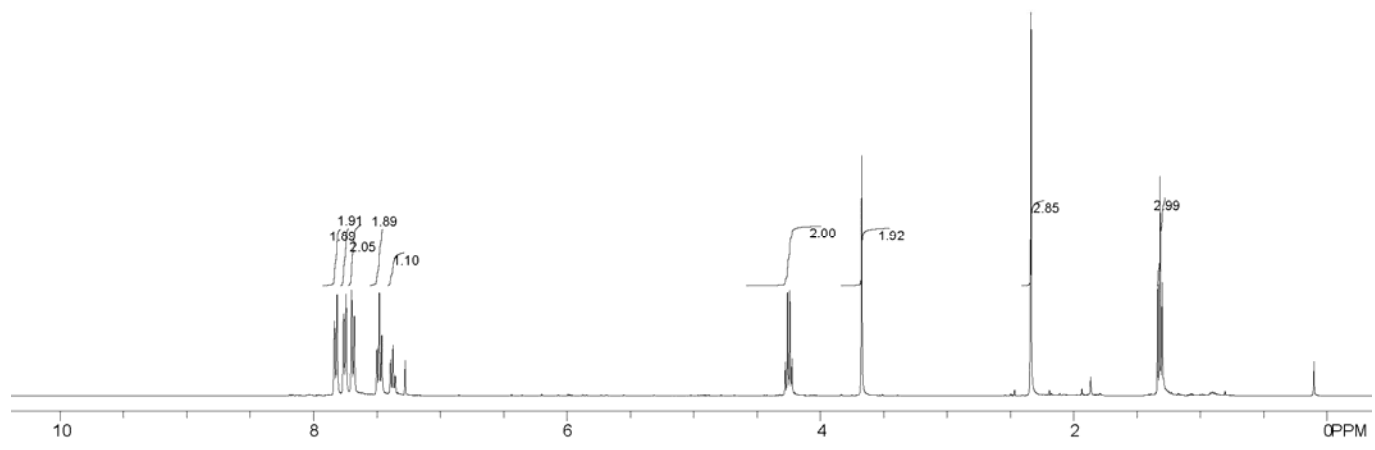

170.990  
150.413  
146.533  
134.856  
130.599  
128.798  
127.964  
126.897  
125.534  
125.499  
125.376  
120.848  
116.793

77.325  
77.007  
76.691

61.149

30.689

14.185  
10.170

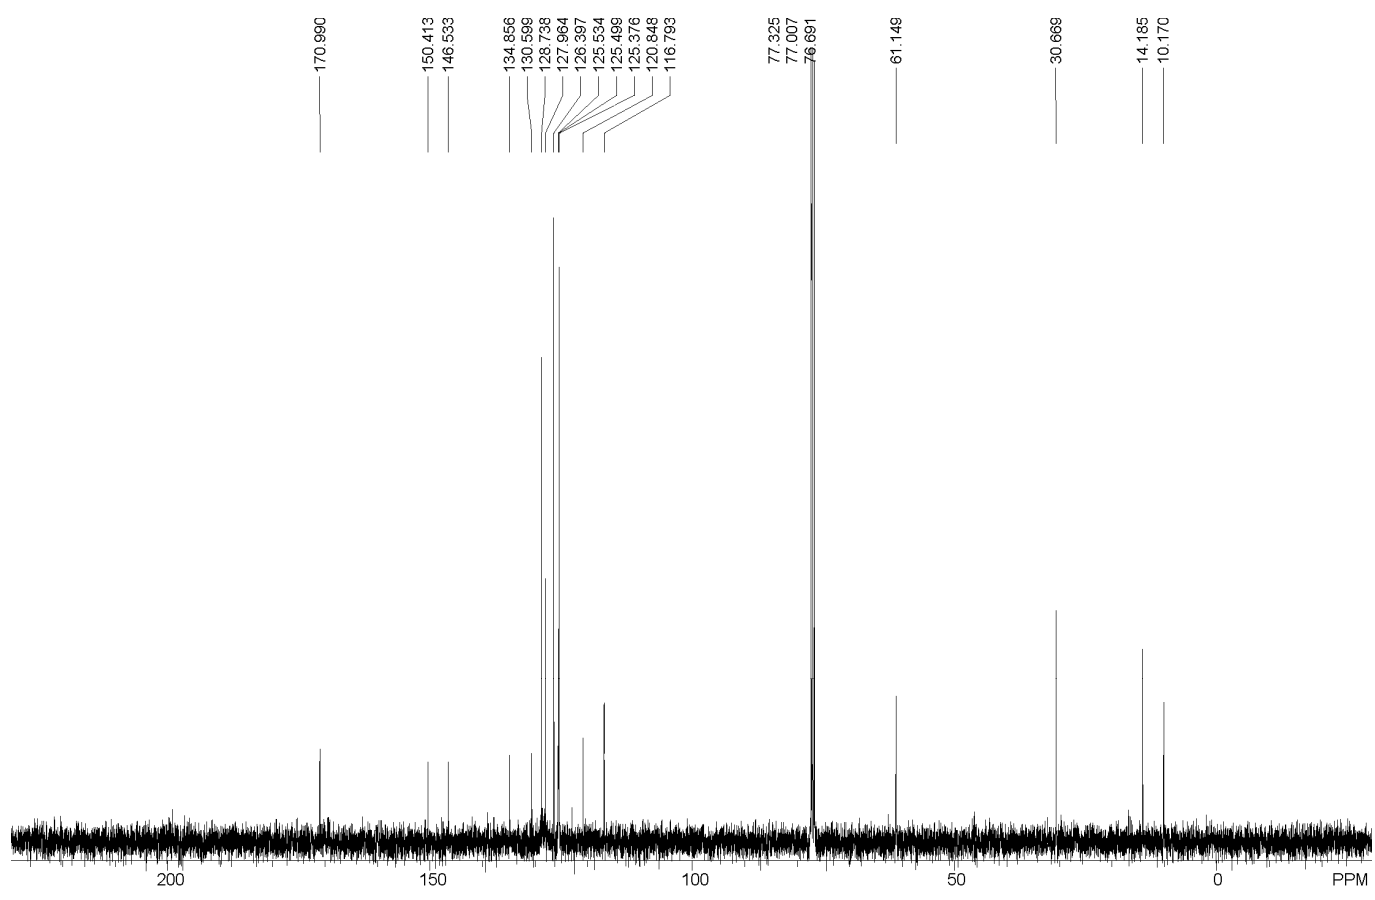

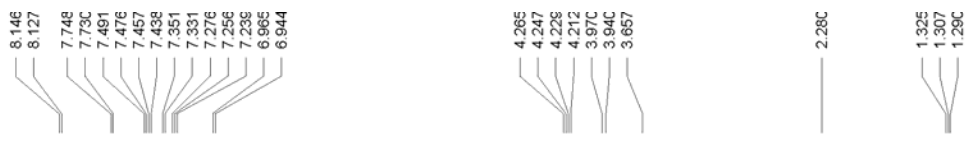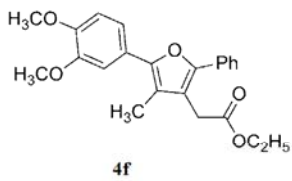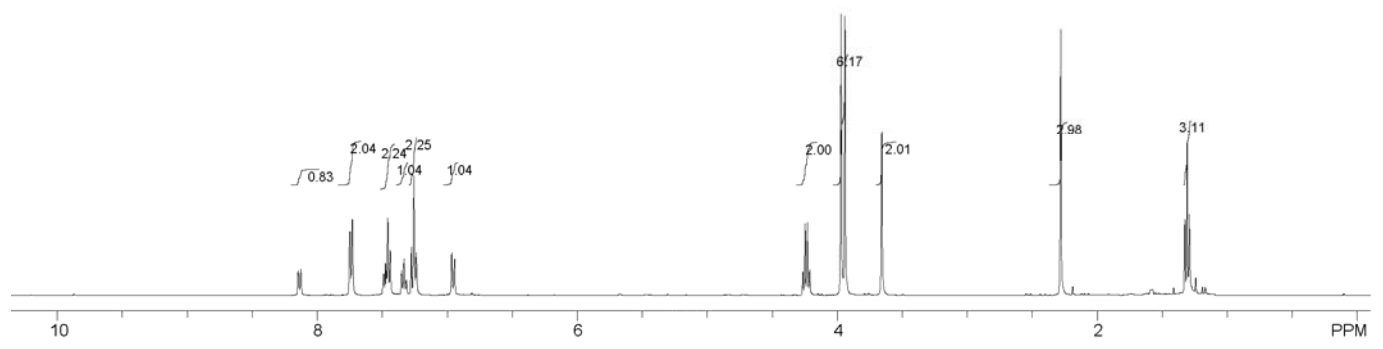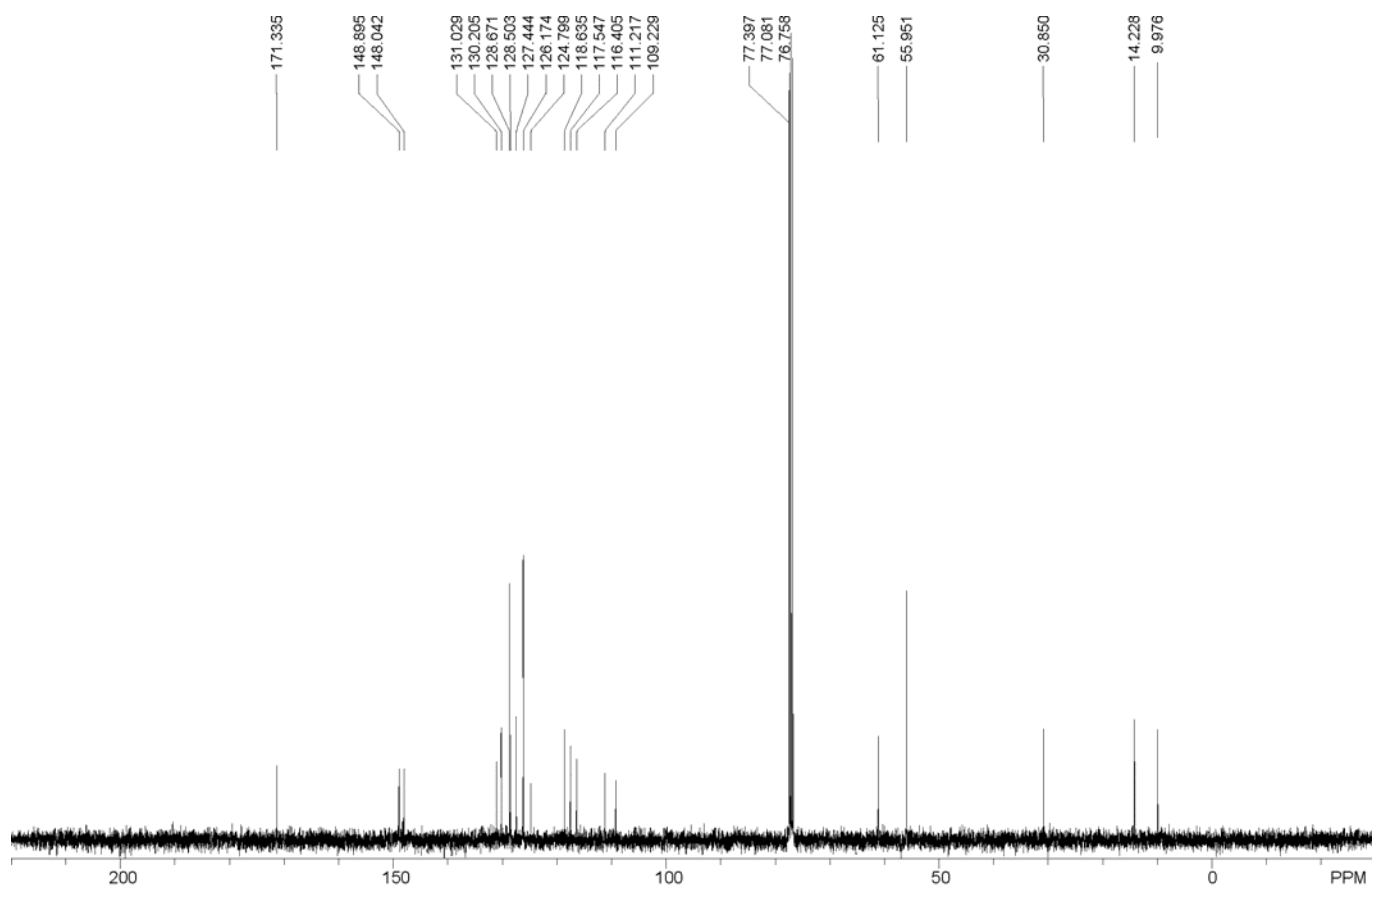

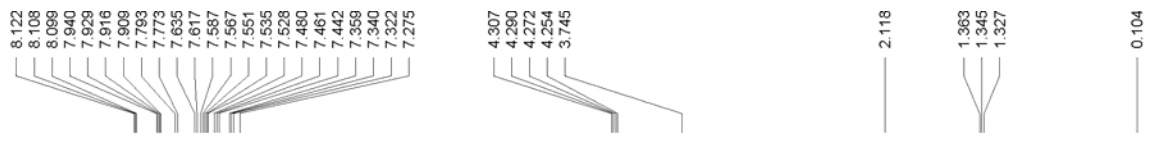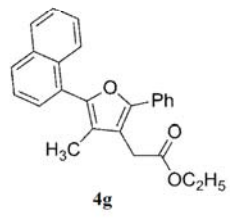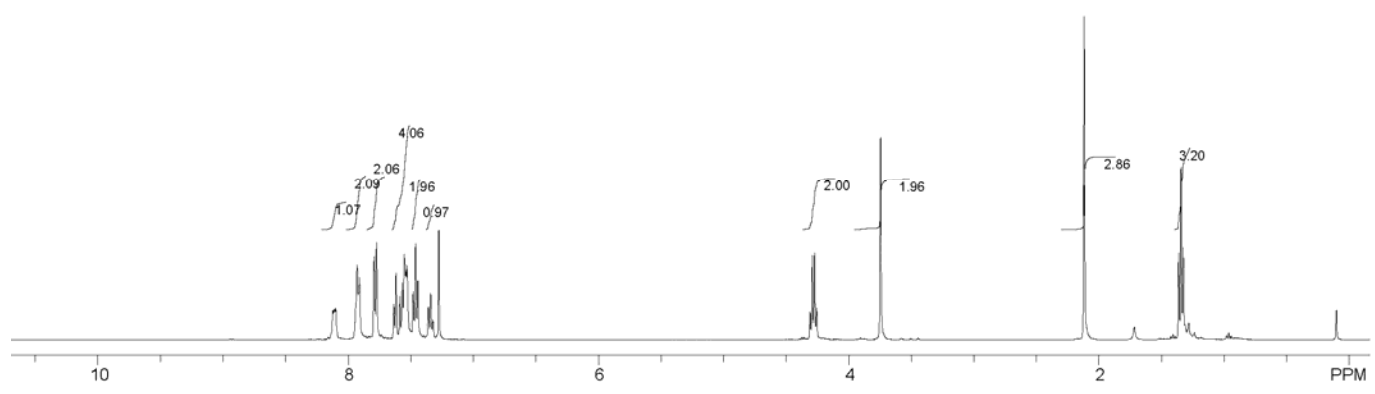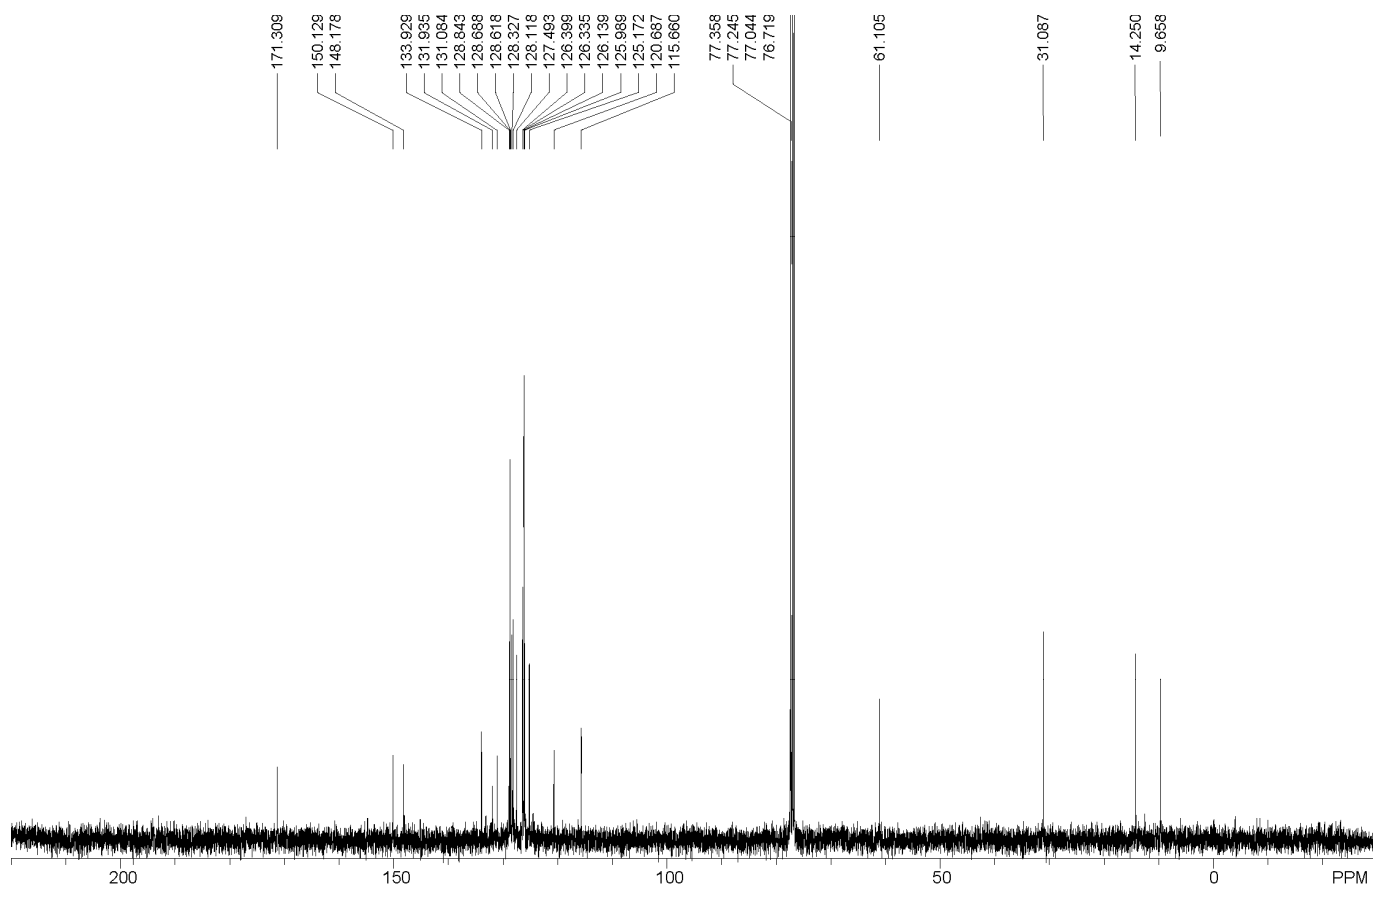

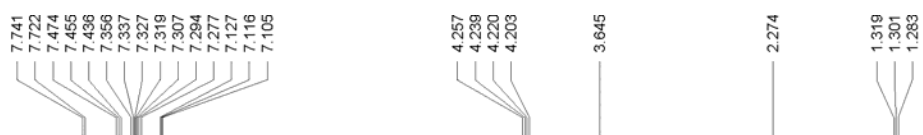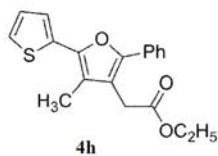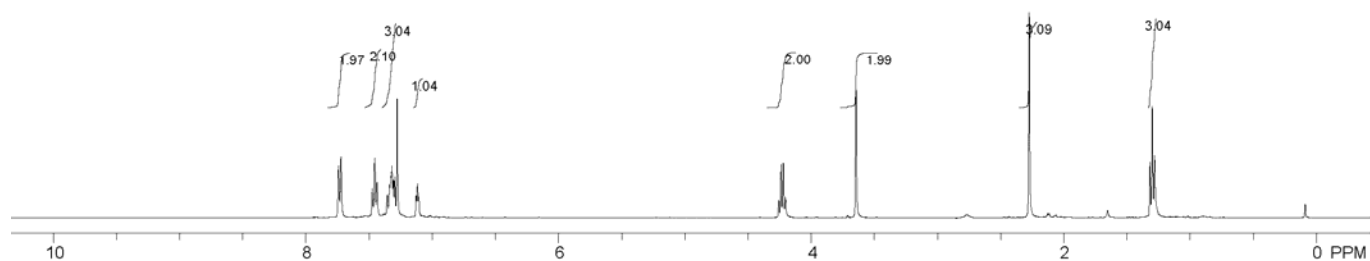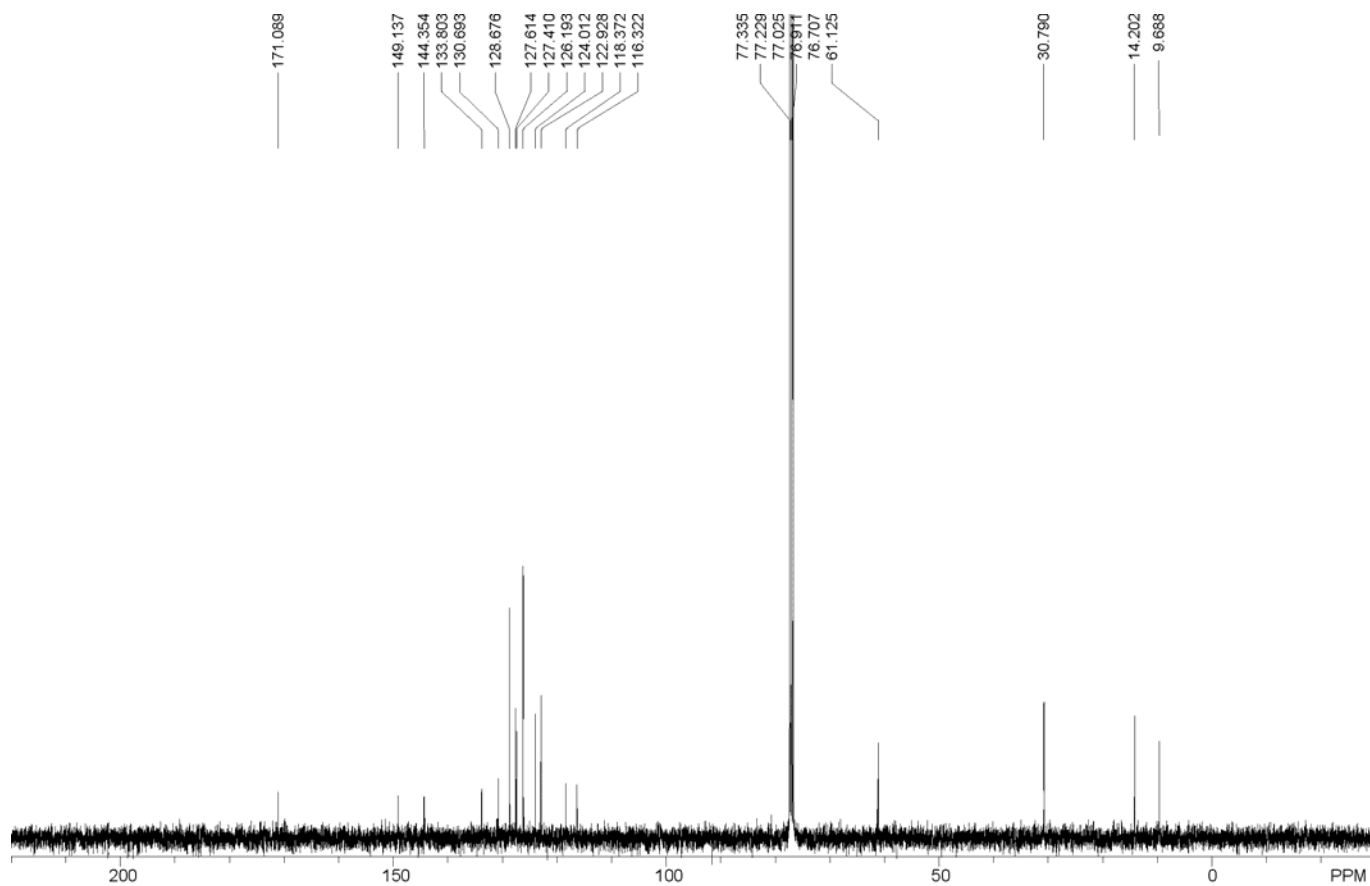

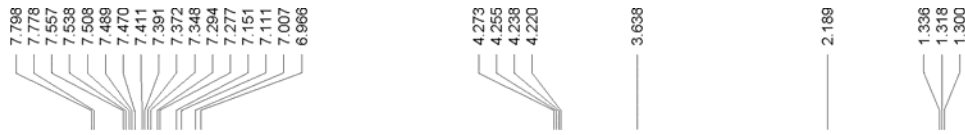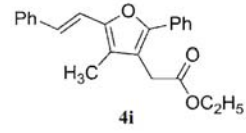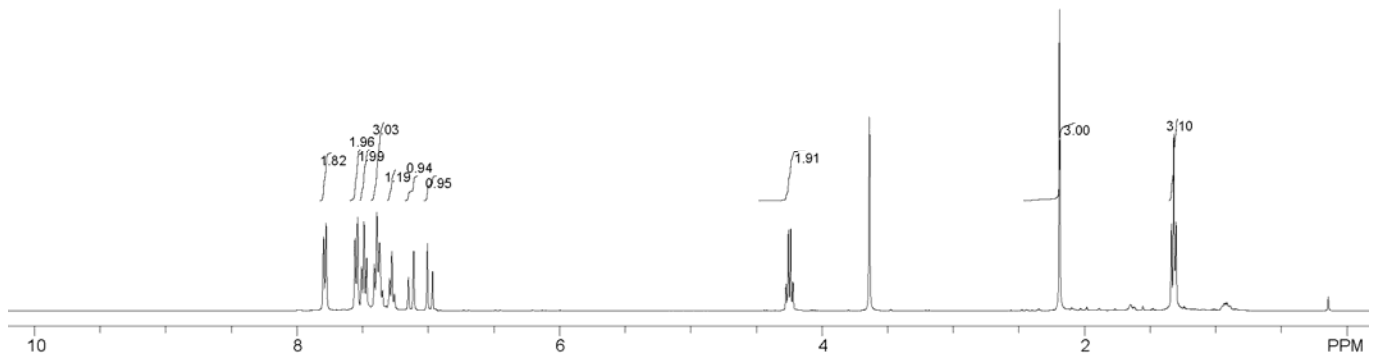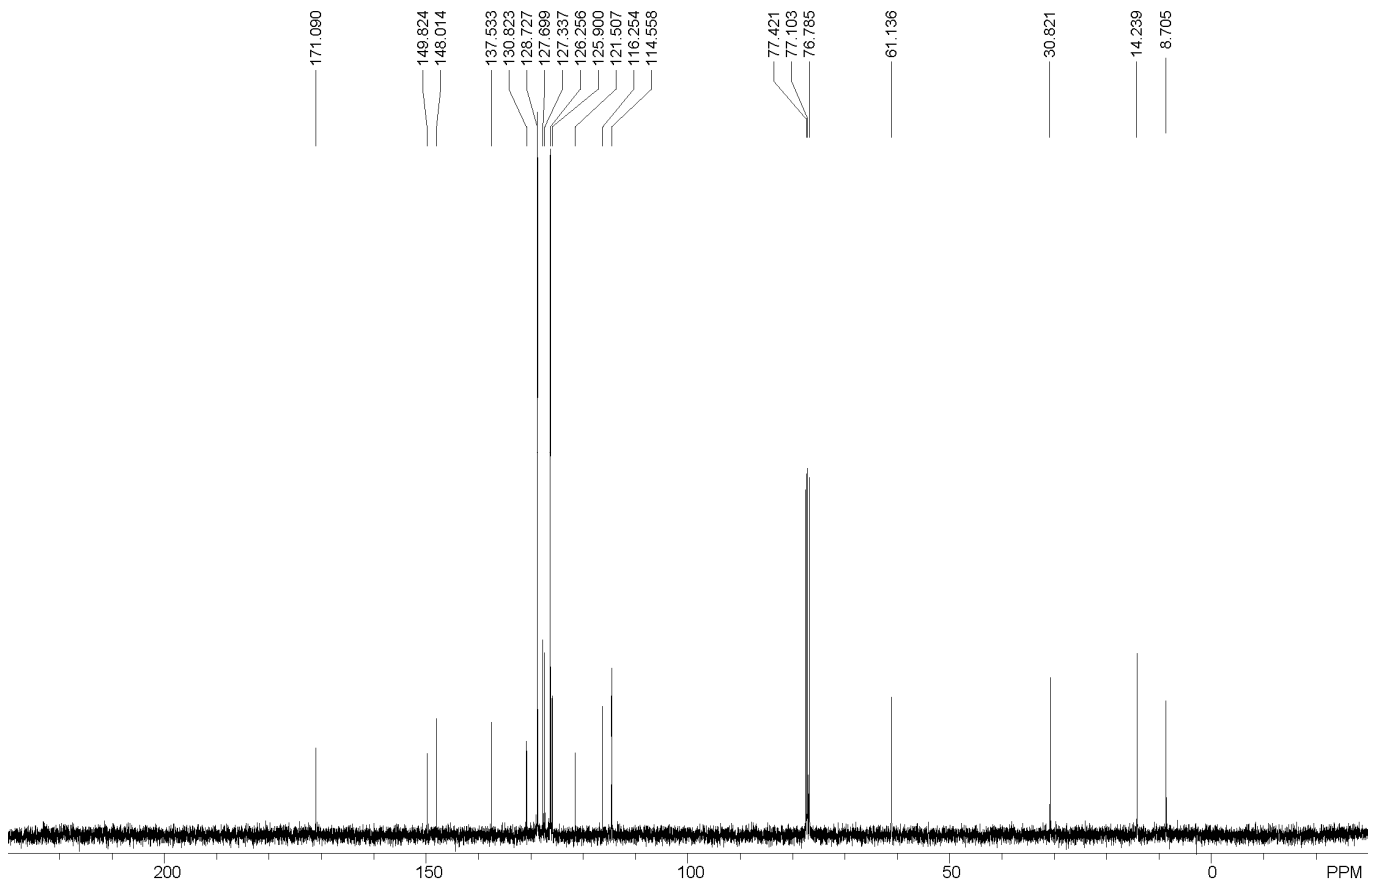



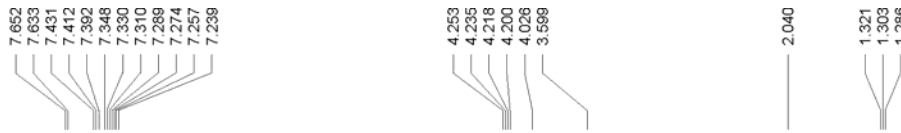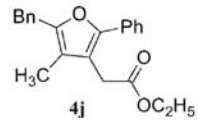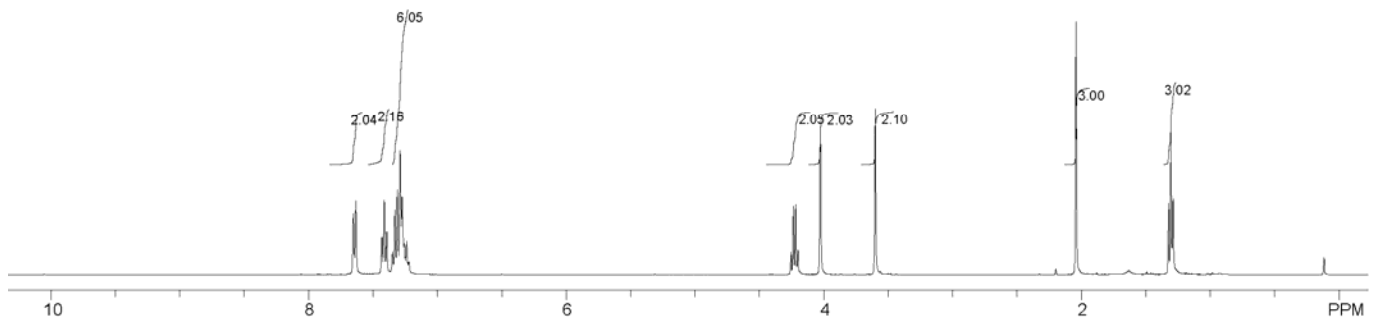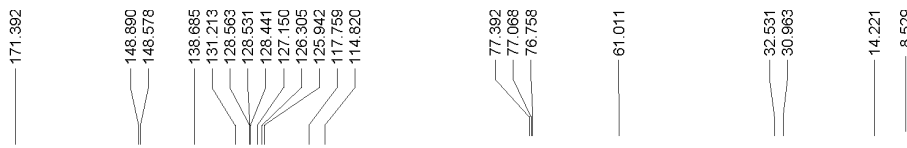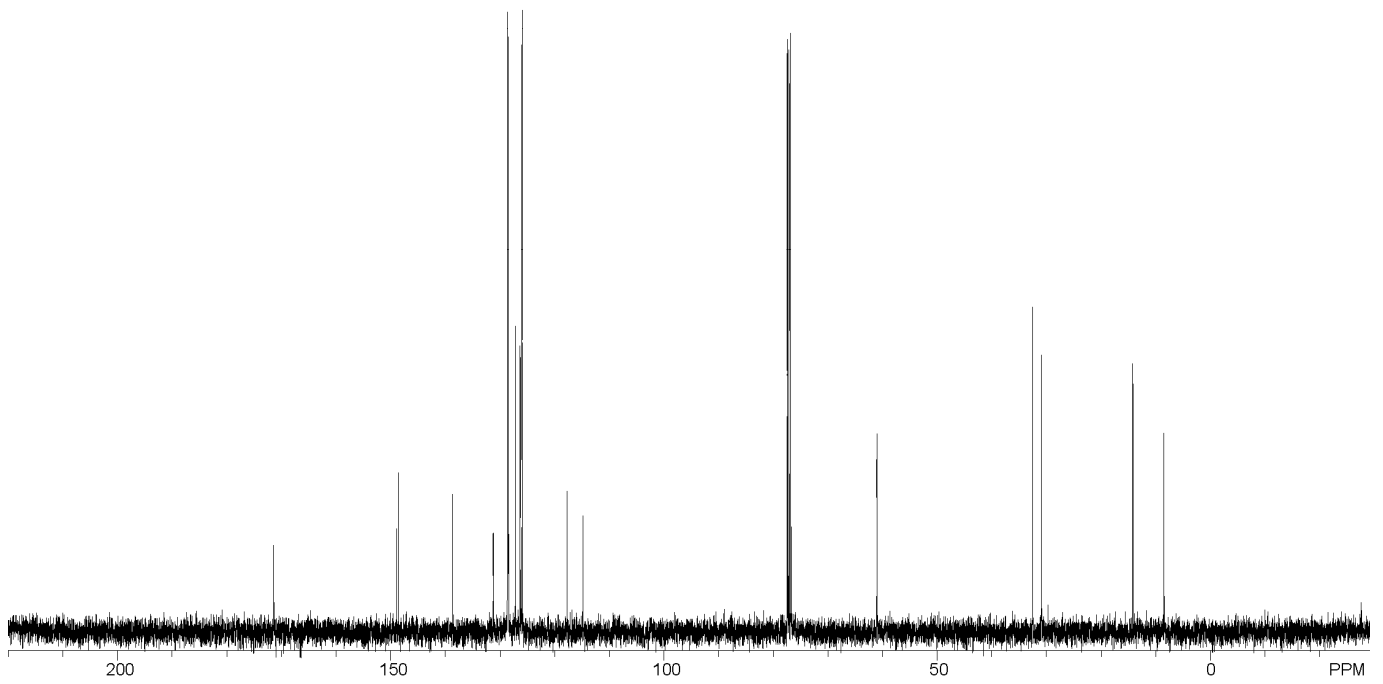

7.669  
7.669  
7.469  
7.451  
7.432  
7.338  
7.320  
7.303  
7.275  
7.258  
7.240  
7.226  
7.209

4.255  
4.238  
4.219  
4.202

3.578

3.014  
2.998  
2.972  
2.956

1.857

1.325  
1.307  
1.290

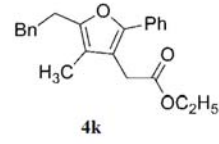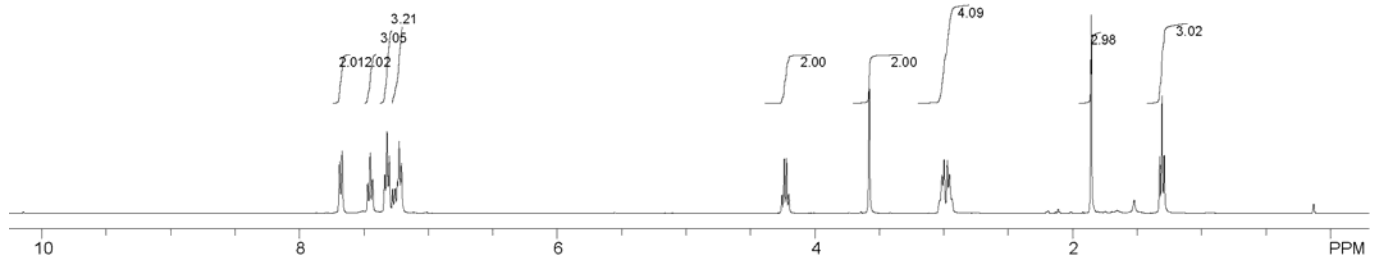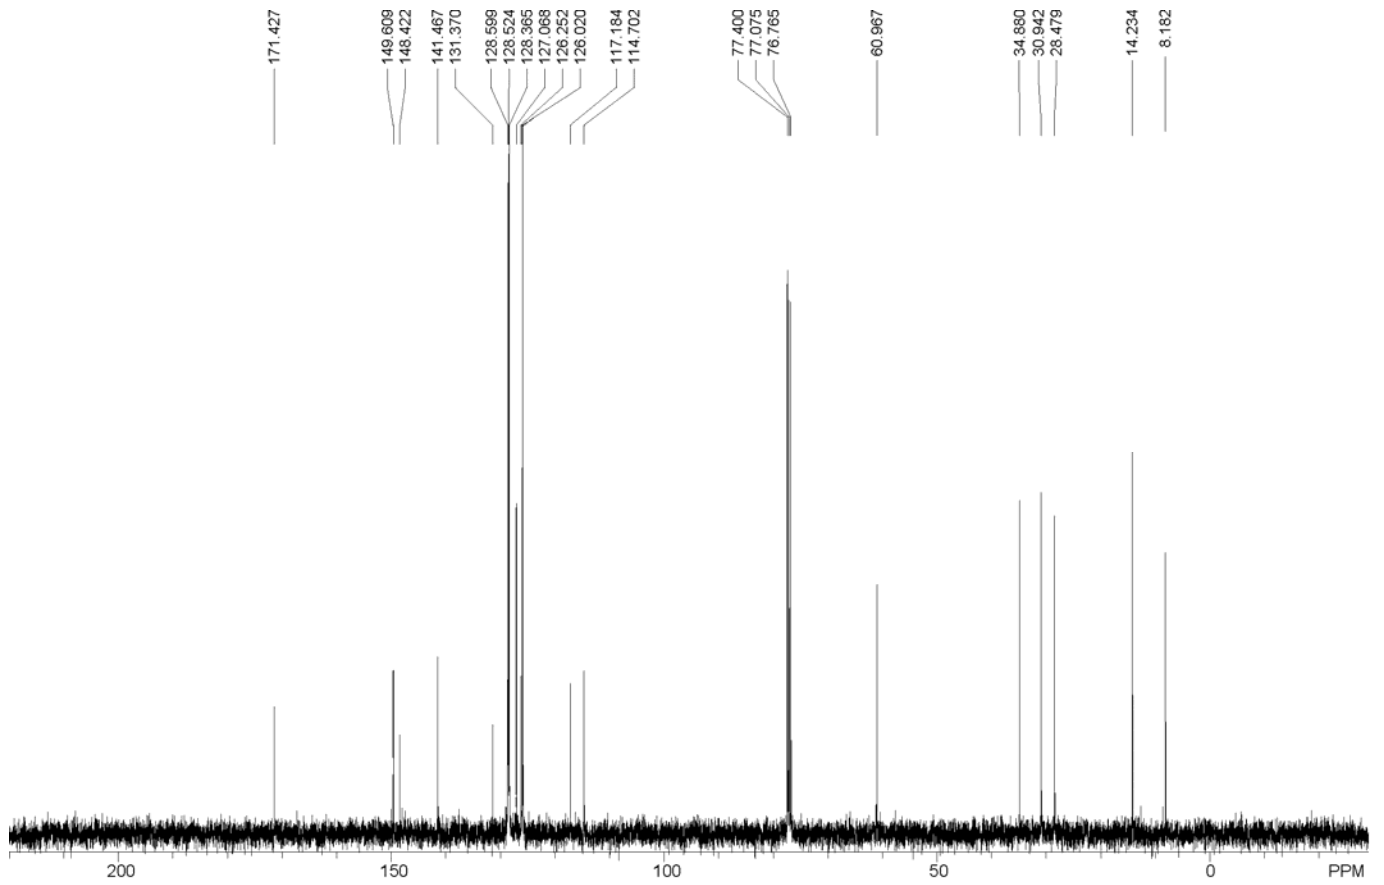

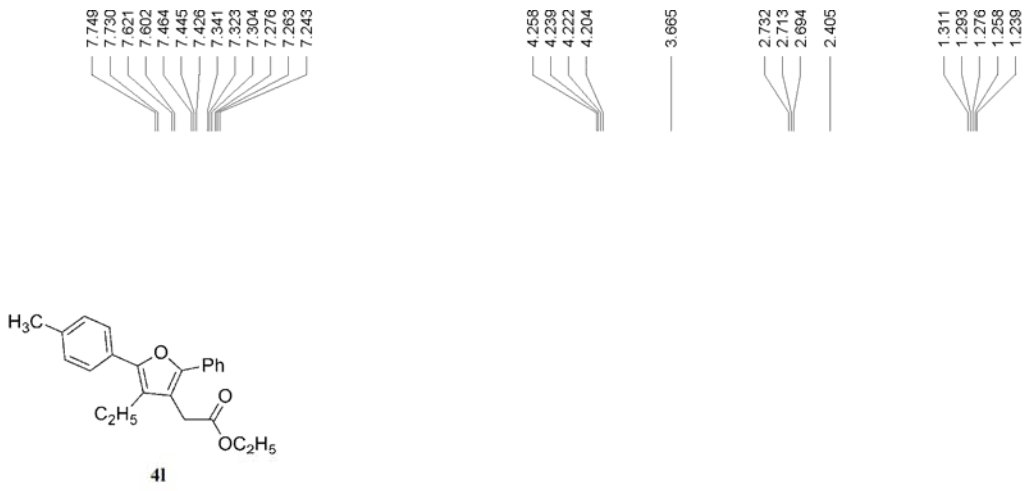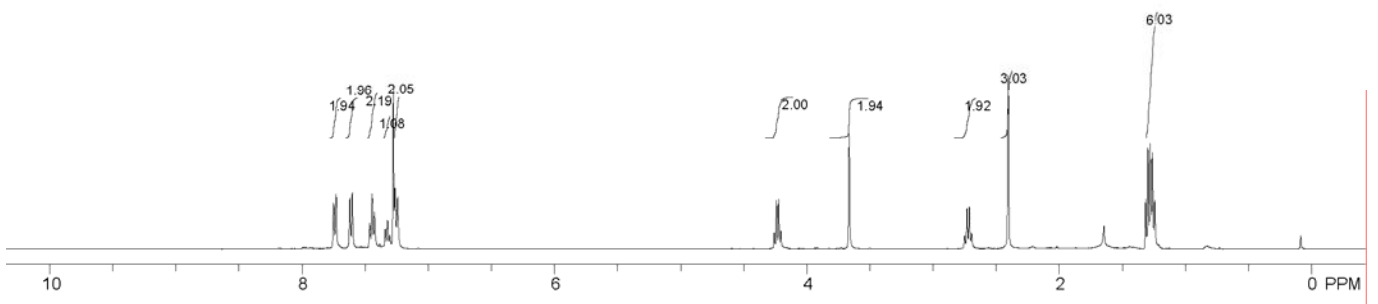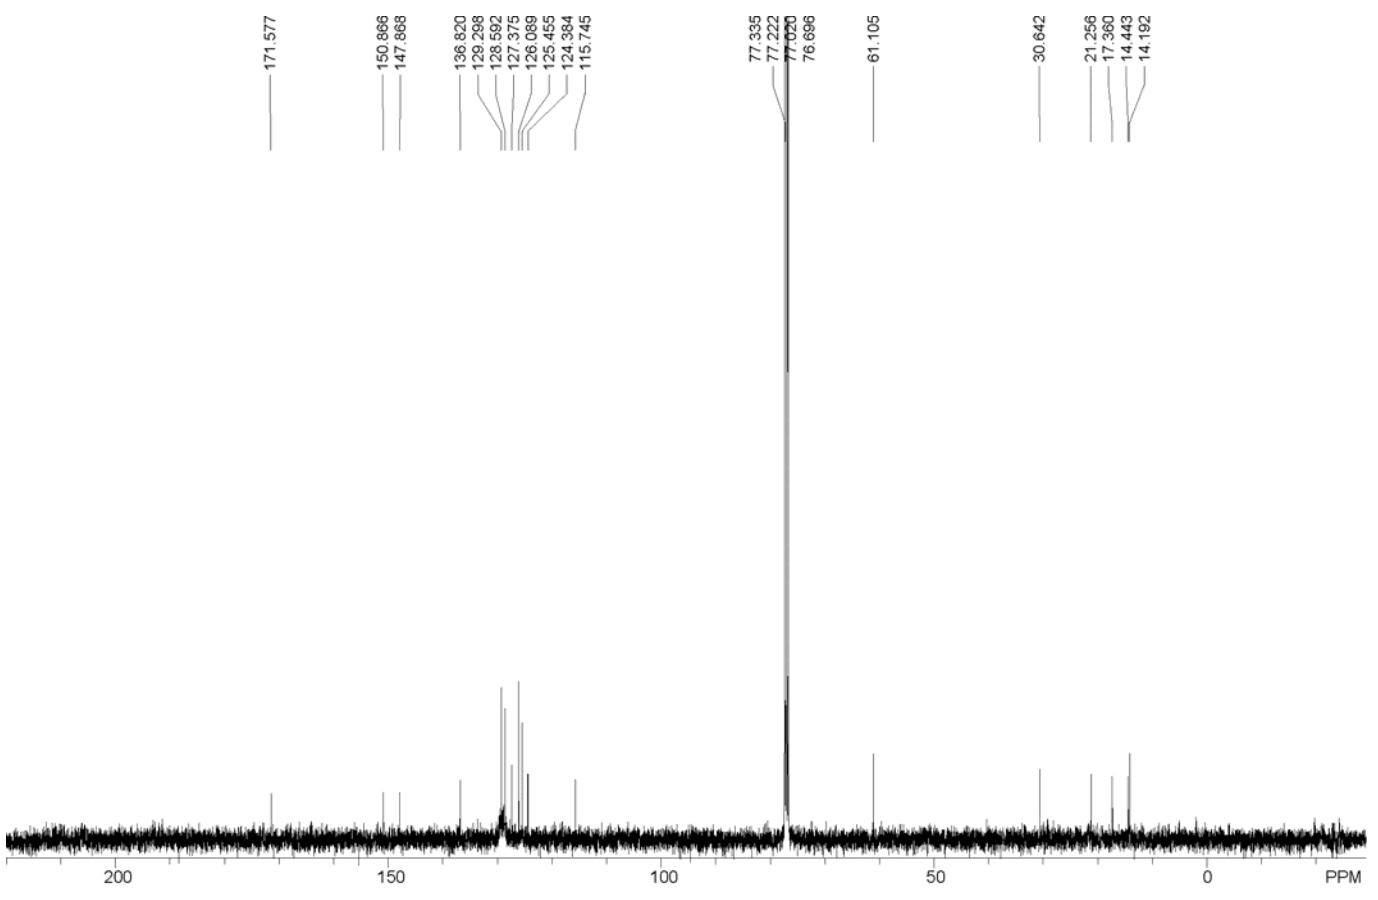

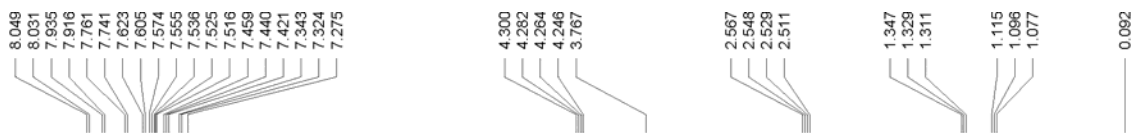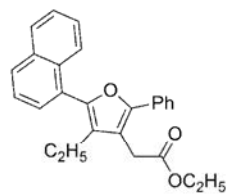

**4m**

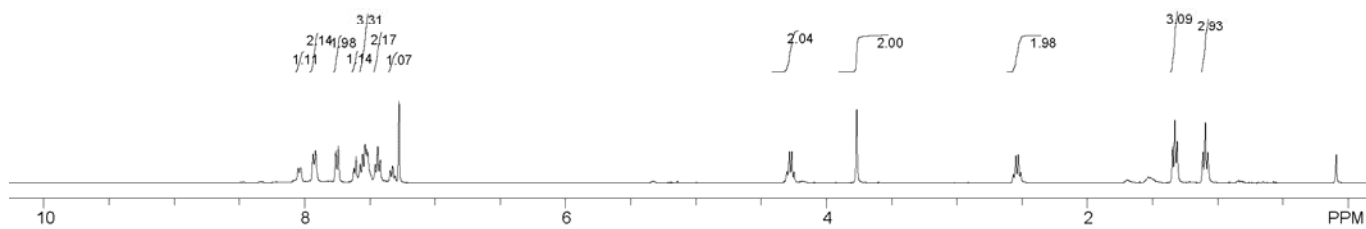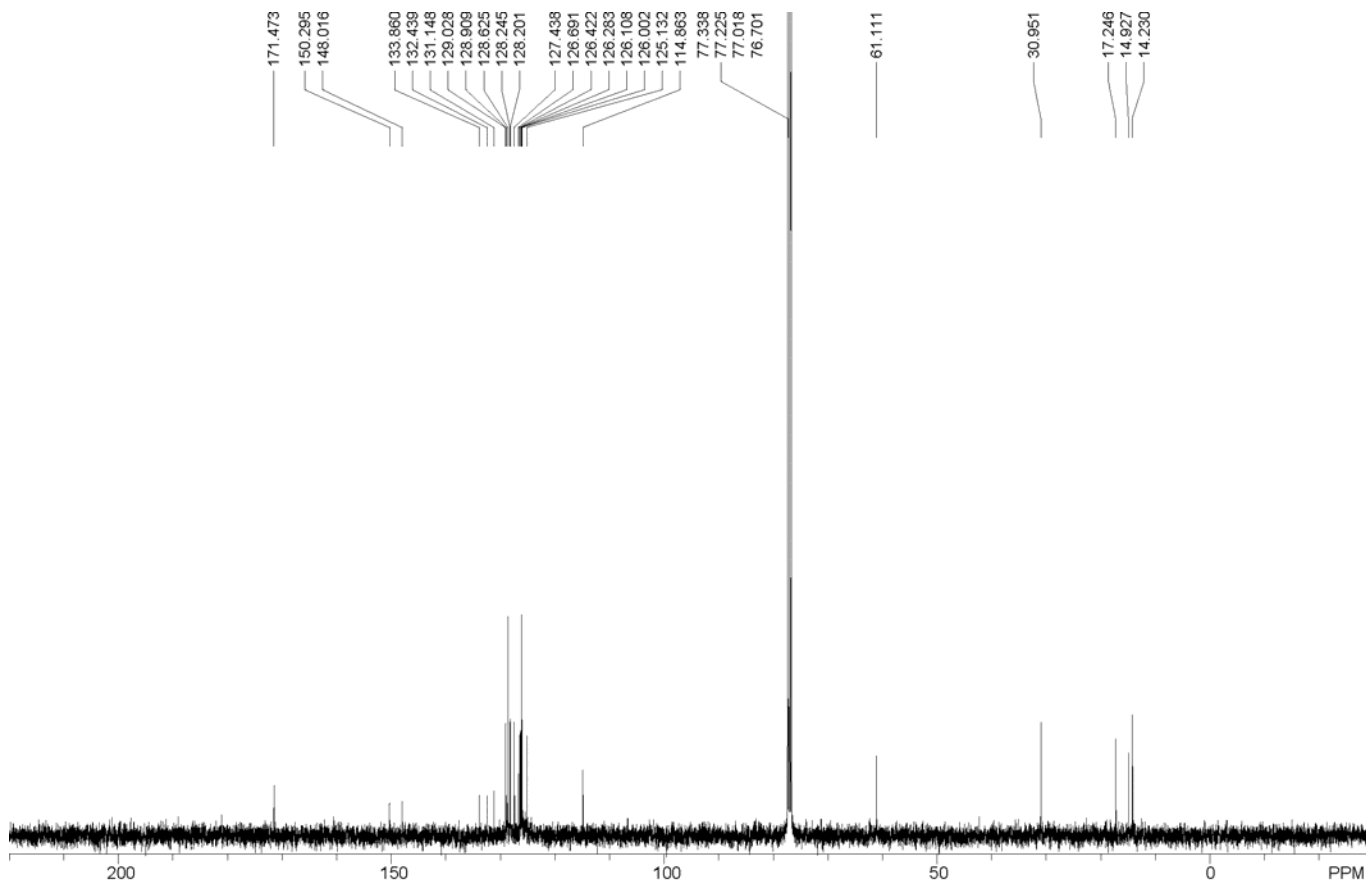

7.733  
7.720  
7.716  
7.704  
7.688  
7.472  
7.453  
7.433  
7.316  
7.298  
7.277  
7.023  
7.001

4.273  
4.255  
4.237  
4.220  
3.873  
3.634

2.314

1.388  
1.330  
1.320  
1.303

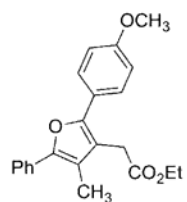

4n

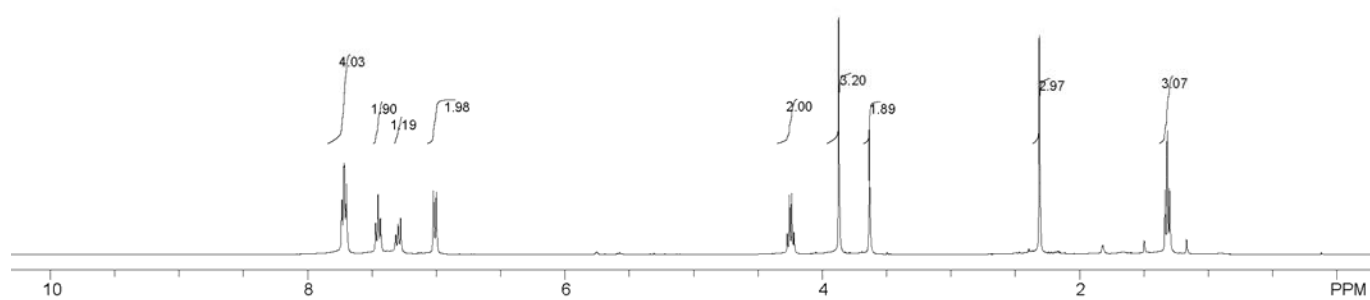

171.443  
159.177  
149.514  
147.370  
131.772  
128.540  
127.709  
126.718  
125.549  
123.829  
118.658  
115.180  
114.141

77.409  
77.091  
76.774

61.093  
55.333

30.833

14.249  
10.108

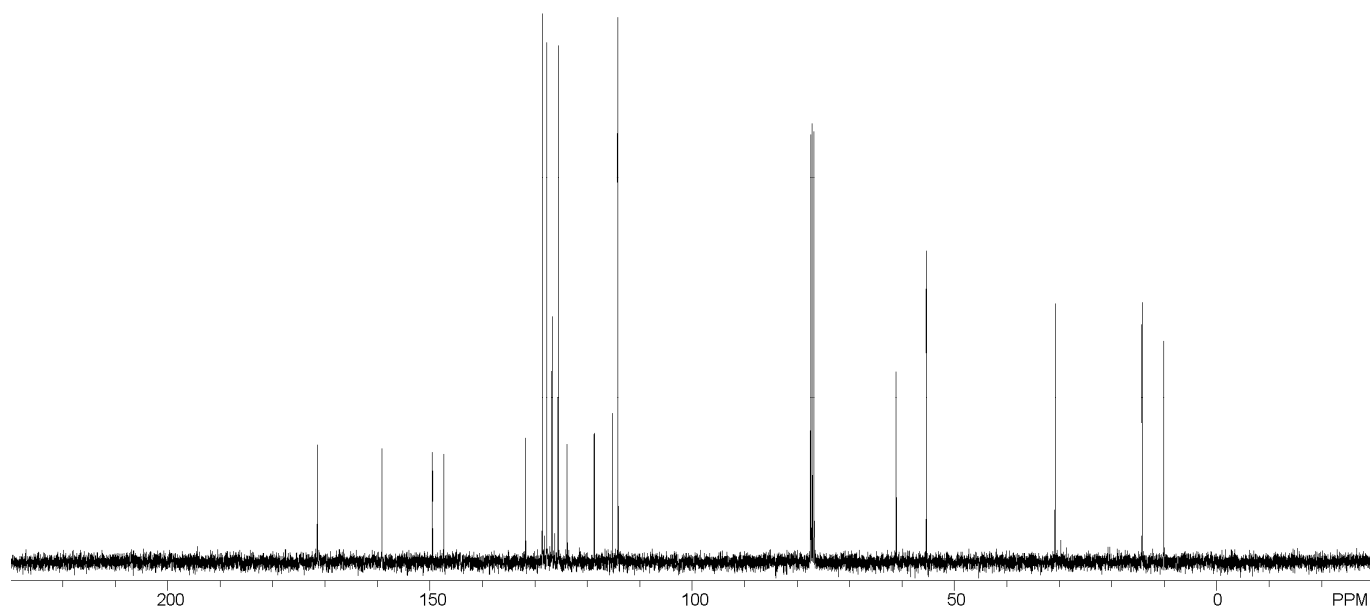

7.729  
7.725  
7.702  
7.497  
7.477  
7.459  
7.440  
7.421  
7.384  
7.373  
7.324  
7.305  
7.285  
7.276

4.216  
4.197  
4.180  
4.162

3.445

2.296

1.303  
1.286  
1.268

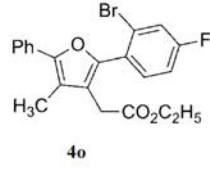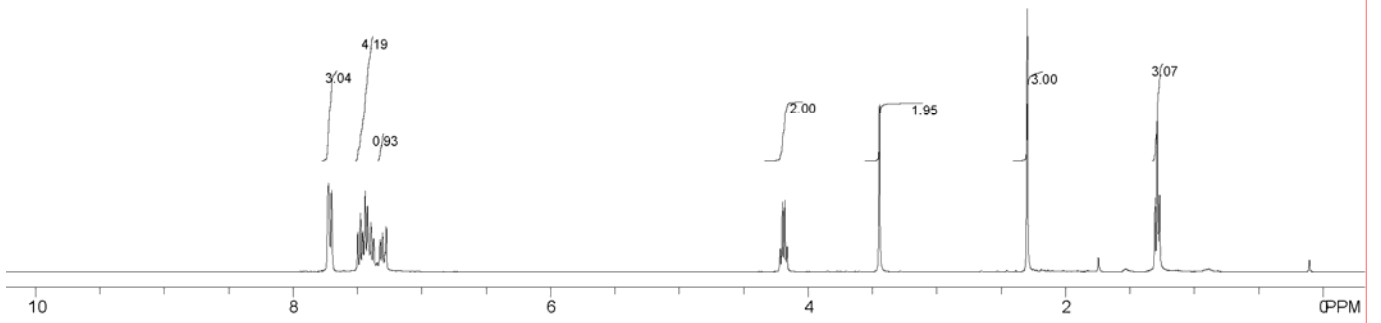

170.983  
163.304  
160.572  
151.056  
149.047  
147.446  
135.272  
133.141  
132.830  
132.700  
131.406  
128.993  
128.727  
128.554  
127.577  
127.150  
126.925  
125.748  
118.840  
117.597

77.364  
77.047  
76.728

61.075

30.540

14.196  
10.144

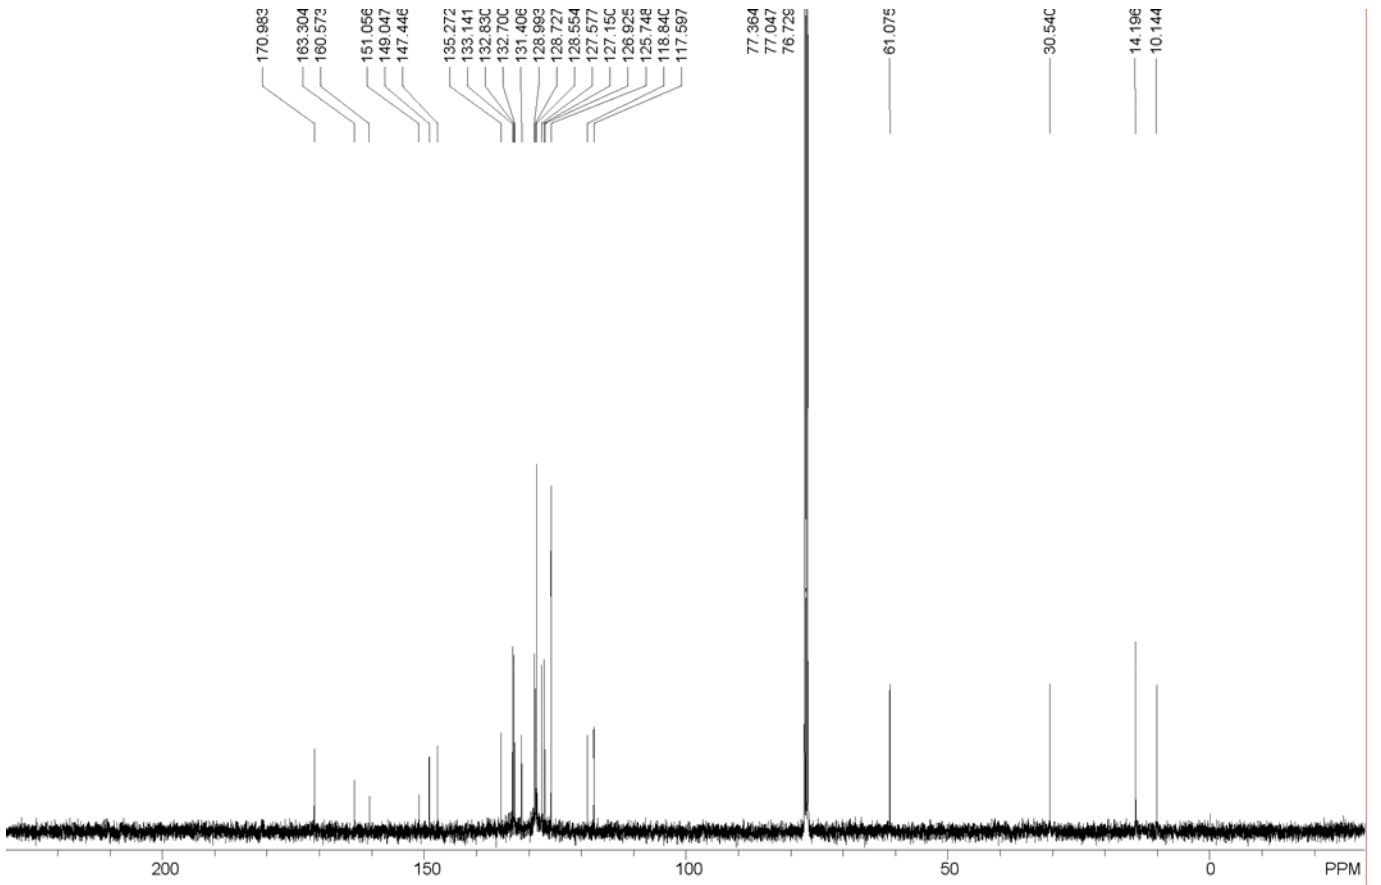

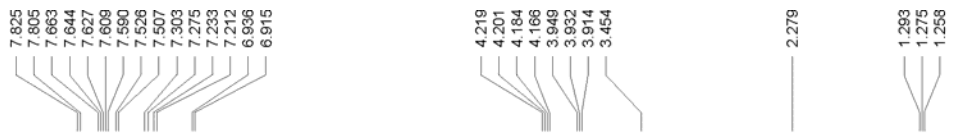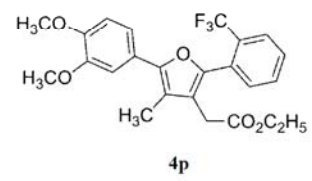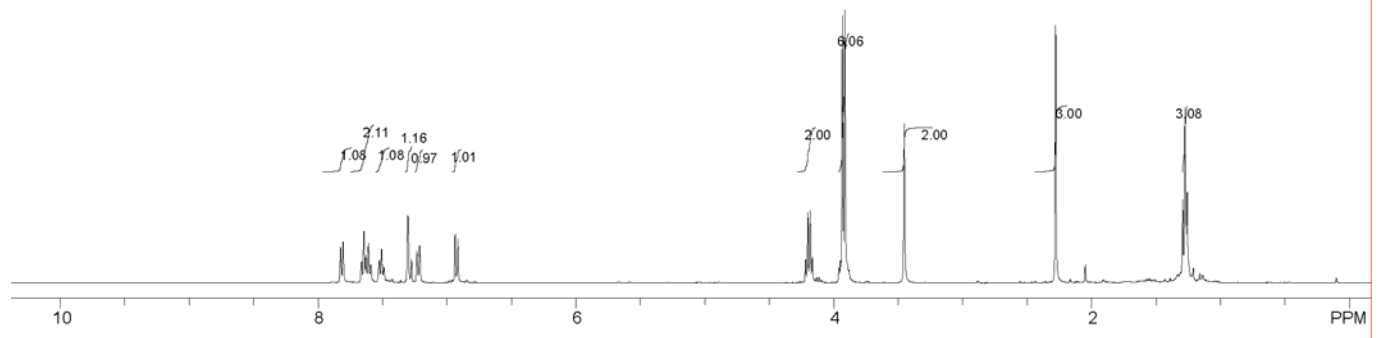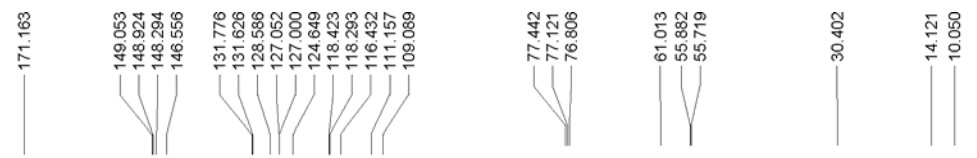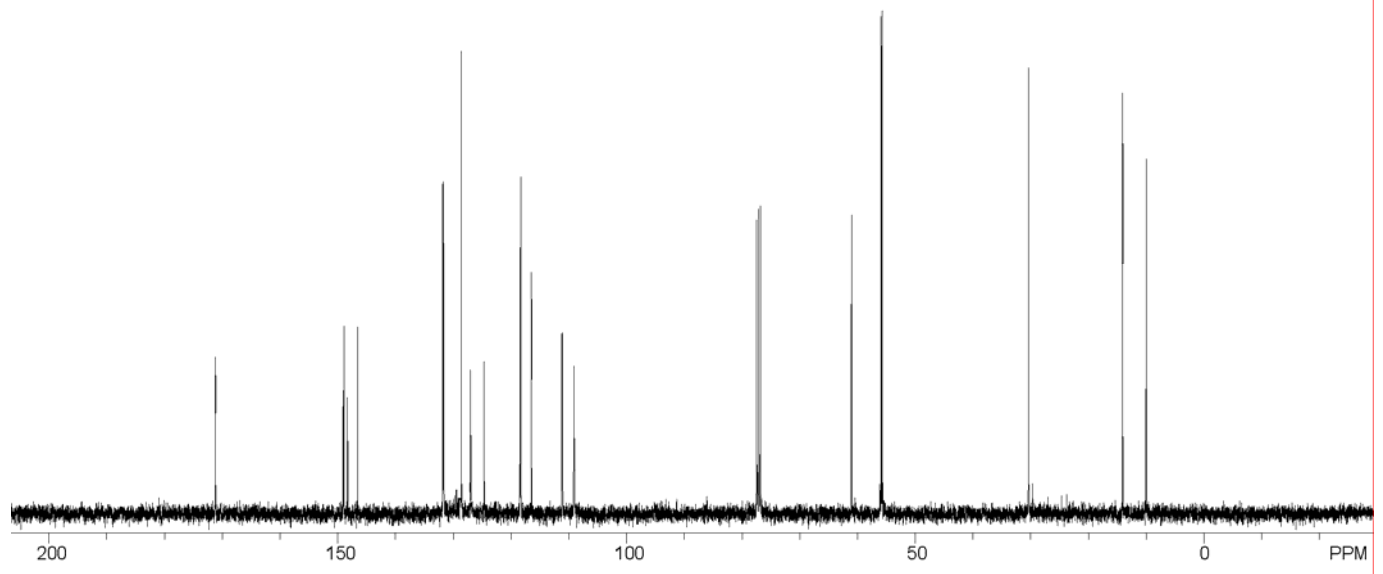

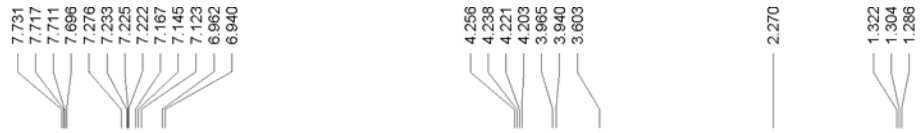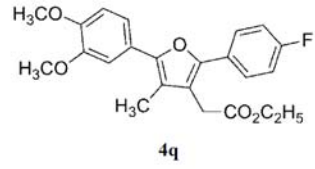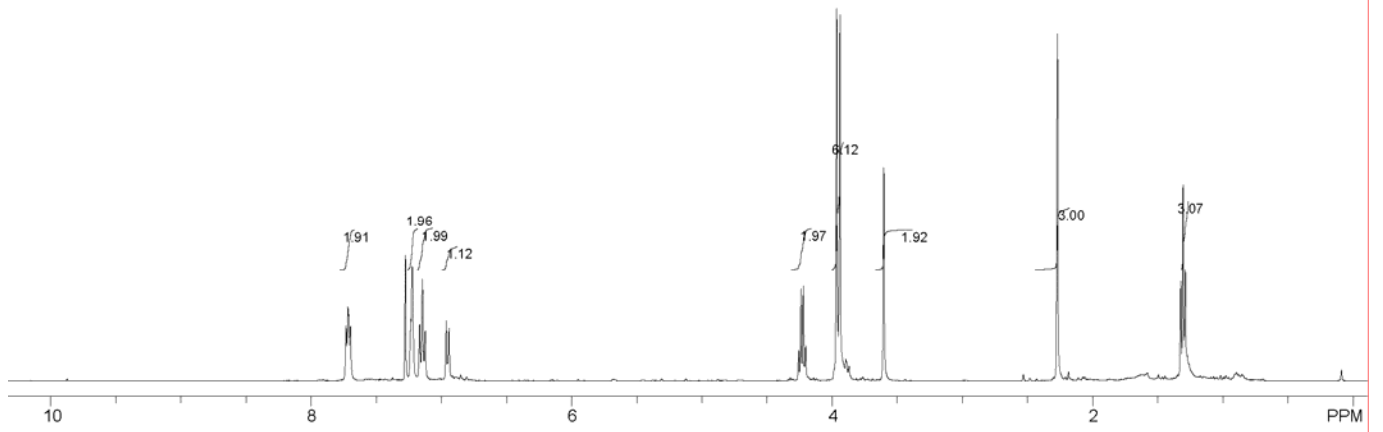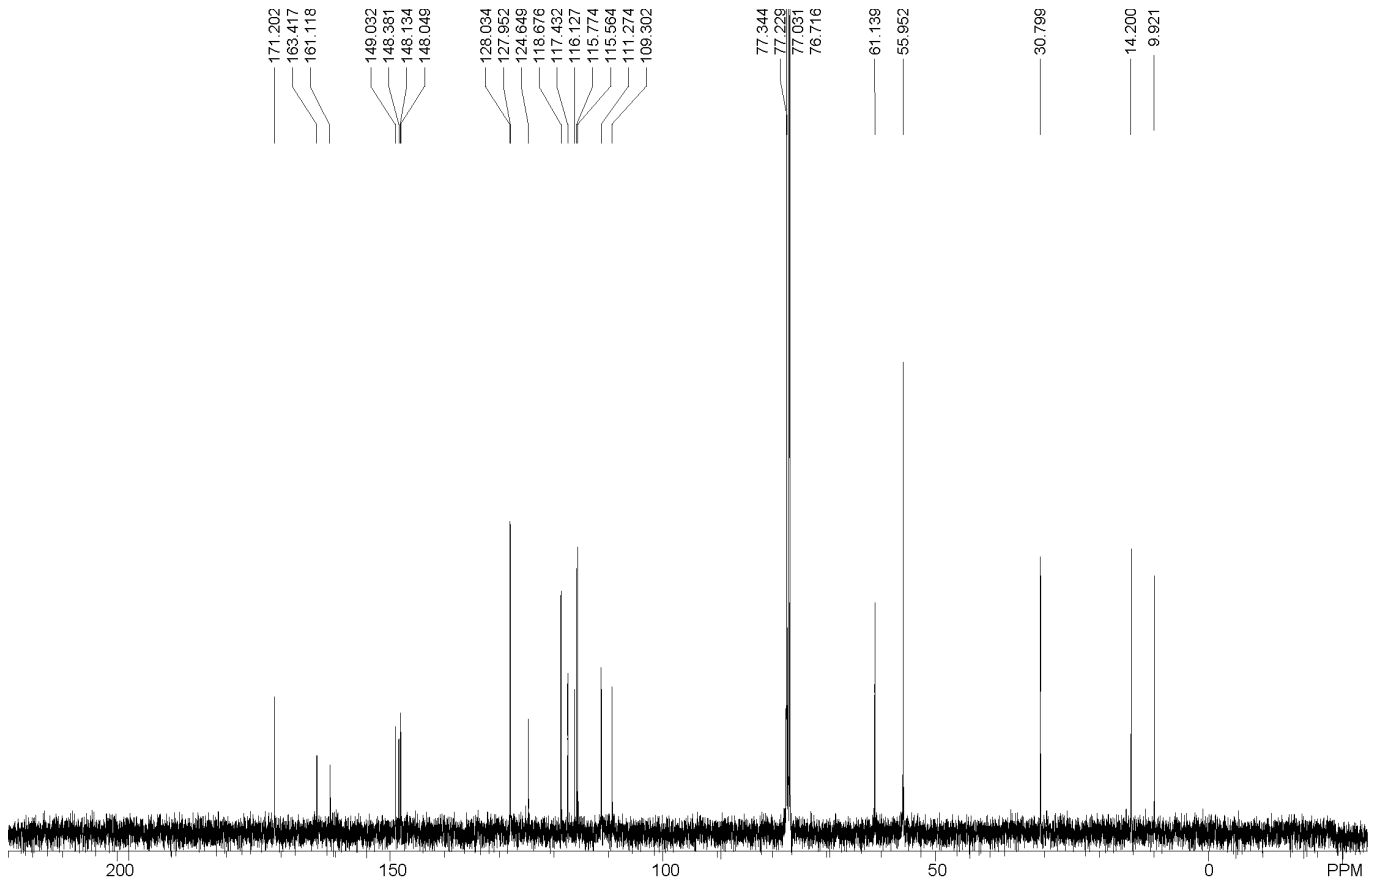



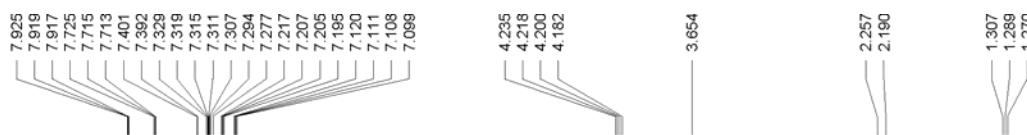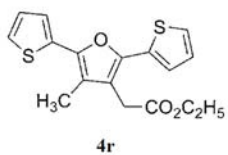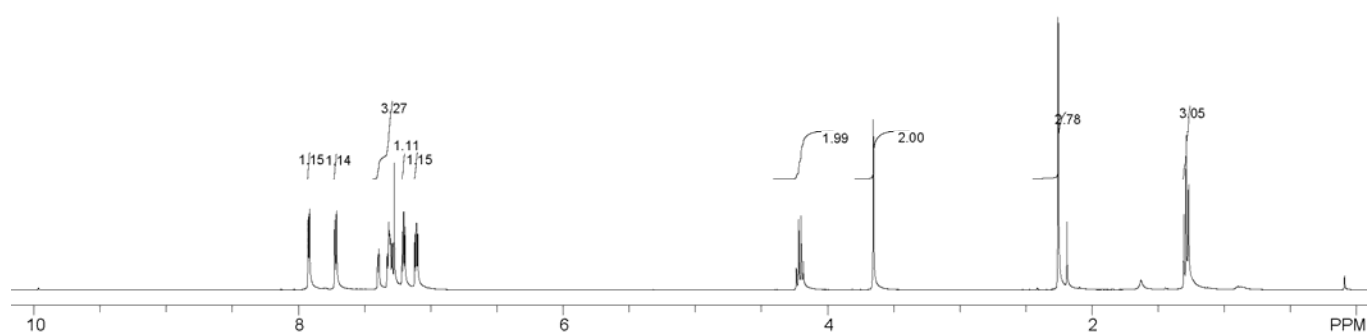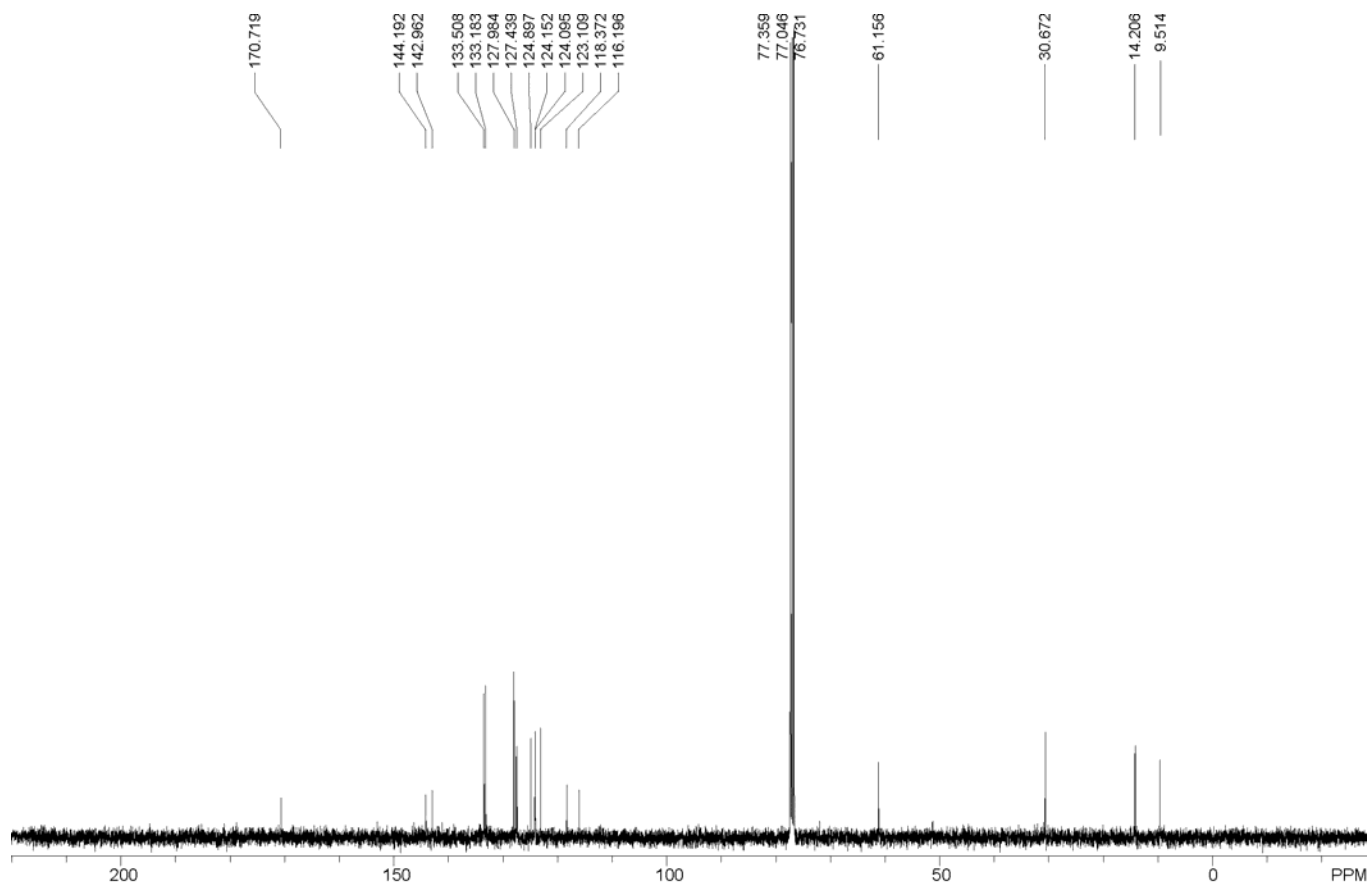

7.762  
7.744  
7.727  
7.494  
7.475  
7.460  
7.442  
7.372  
7.353  
7.334  
7.315  
7.297  
7.281  
7.276

3.796  
3.790  
3.686

2.316  
2.310

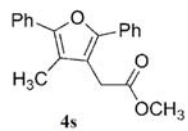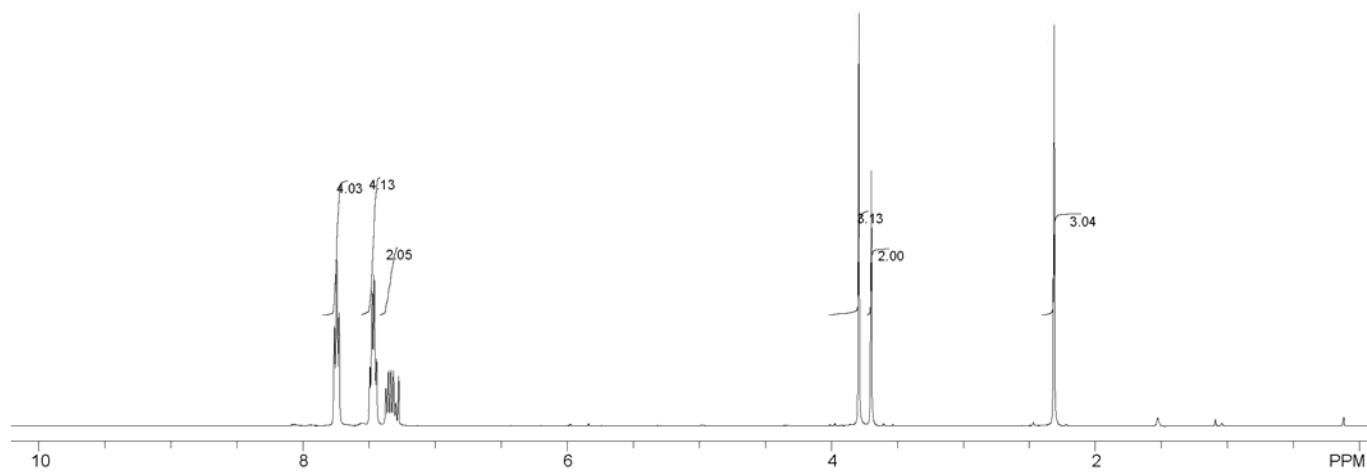

171.856

149.400  
148.041

131.638  
130.970  
128.696  
128.536  
127.566  
126.944  
126.211  
125.704  
118.721  
116.317

77.368  
77.049  
76.731

52.187

30.565

9.978

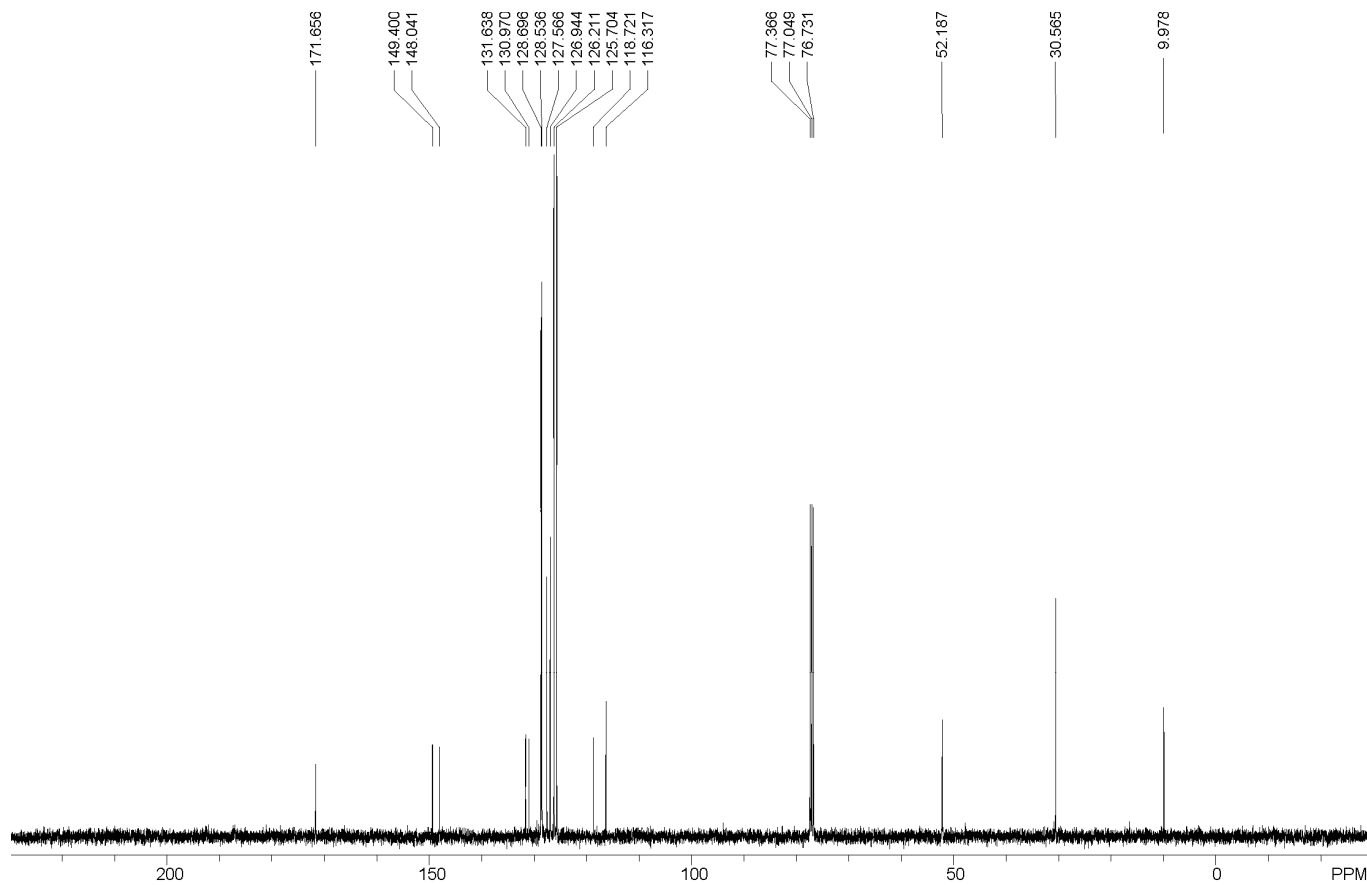

7.770  
7.750  
7.735  
7.715  
7.474  
7.456  
7.438  
7.388  
7.339  
7.323  
7.305  
7.276

4.200  
4.183  
4.166  
3.688

2.311  
1.890  
1.672  
1.655  
1.637  
1.619  
1.594  
1.428  
1.408  
1.389  
1.371  
0.960  
0.942  
0.924  
0.093

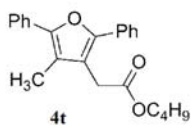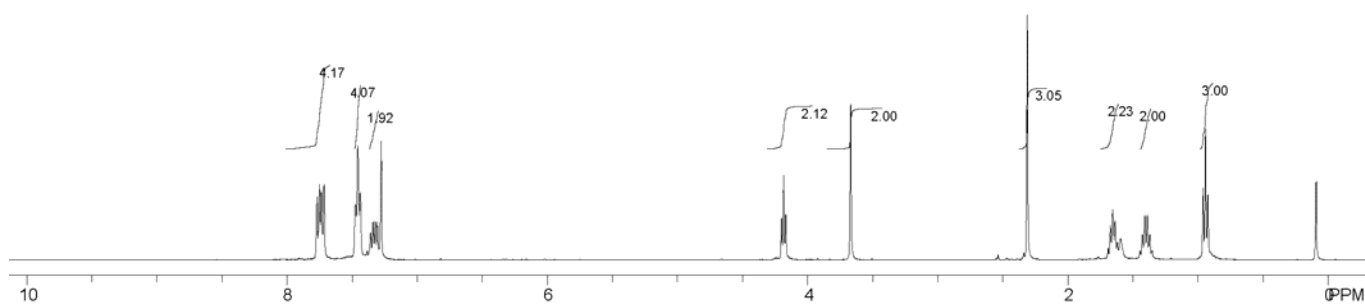

171.332  
149.353  
147.968  
131.660  
130.965  
128.655  
128.539  
127.522  
126.905  
126.191  
125.678  
118.759  
116.498

77.347  
77.230  
77.095  
76.710  
64.952

30.837  
30.637  
19.105  
13.667  
10.019

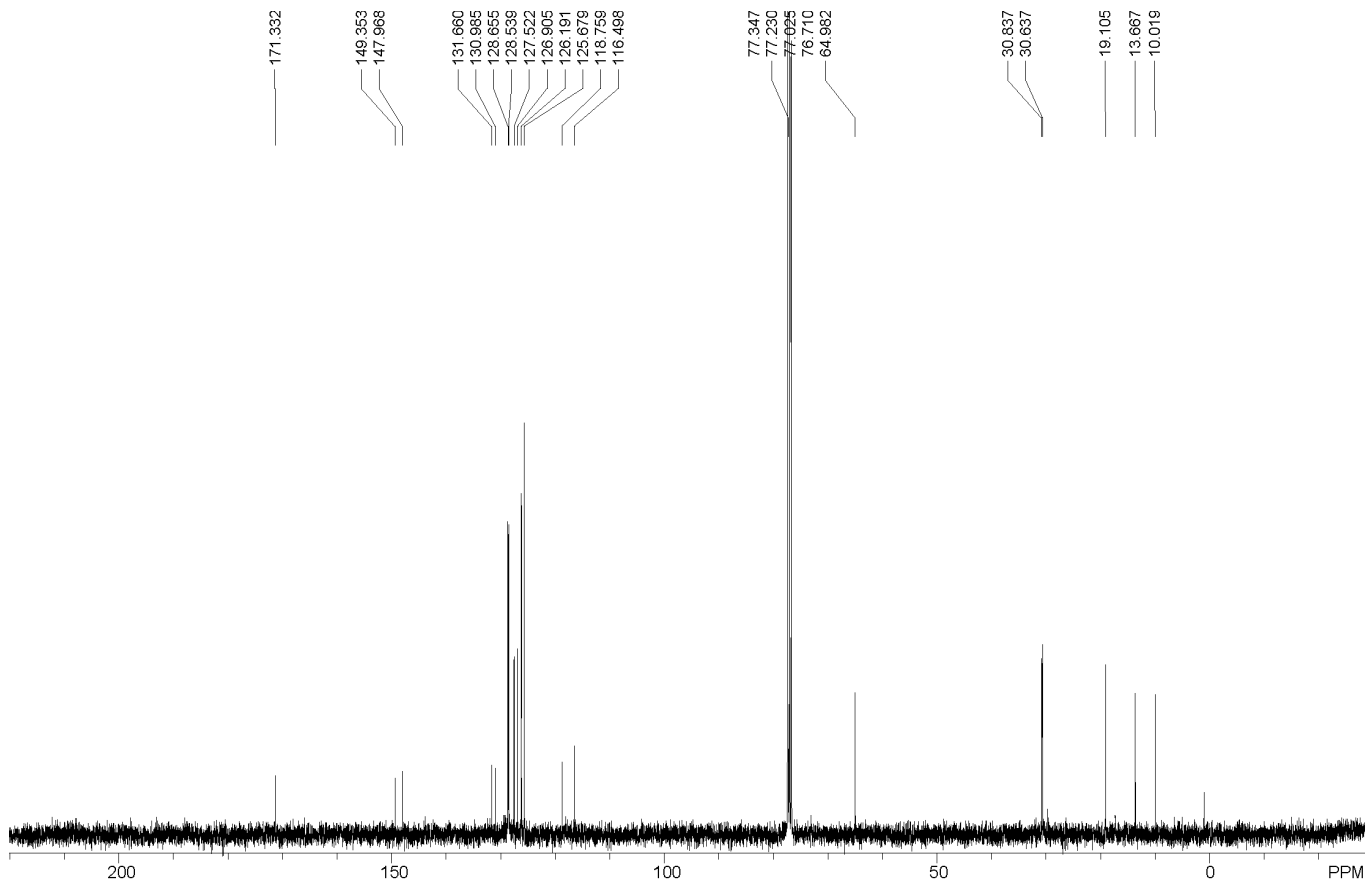

7.769  
7.749  
7.733  
7.713  
7.471  
7.452  
7.436  
7.356  
7.338  
7.321  
7.303  
7.277

4.189  
4.172  
4.156  
3.667

2.311  
1.677  
1.659  
1.642  
1.625  
1.598  
1.374  
1.357  
1.337  
1.307  
1.298  
1.292  
1.260  
0.896  
0.881  
0.864  
0.090

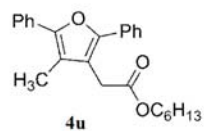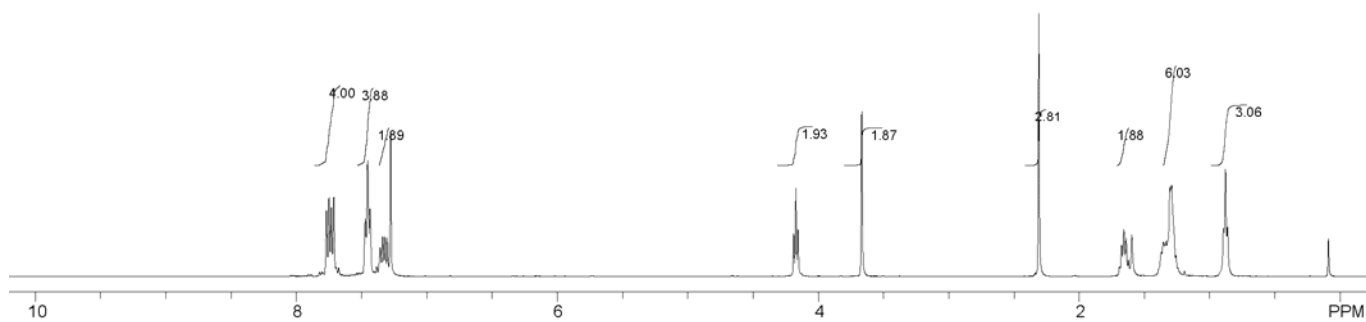

171.349  
148.320  
147.852  
131.845  
130.973  
128.653  
128.530  
127.523  
128.900  
128.180  
125.862  
118.754  
116.509  
77.352  
77.236  
77.097  
76.722  
65.286  
31.383  
30.846  
28.569  
25.563  
22.527  
13.970  
10.037

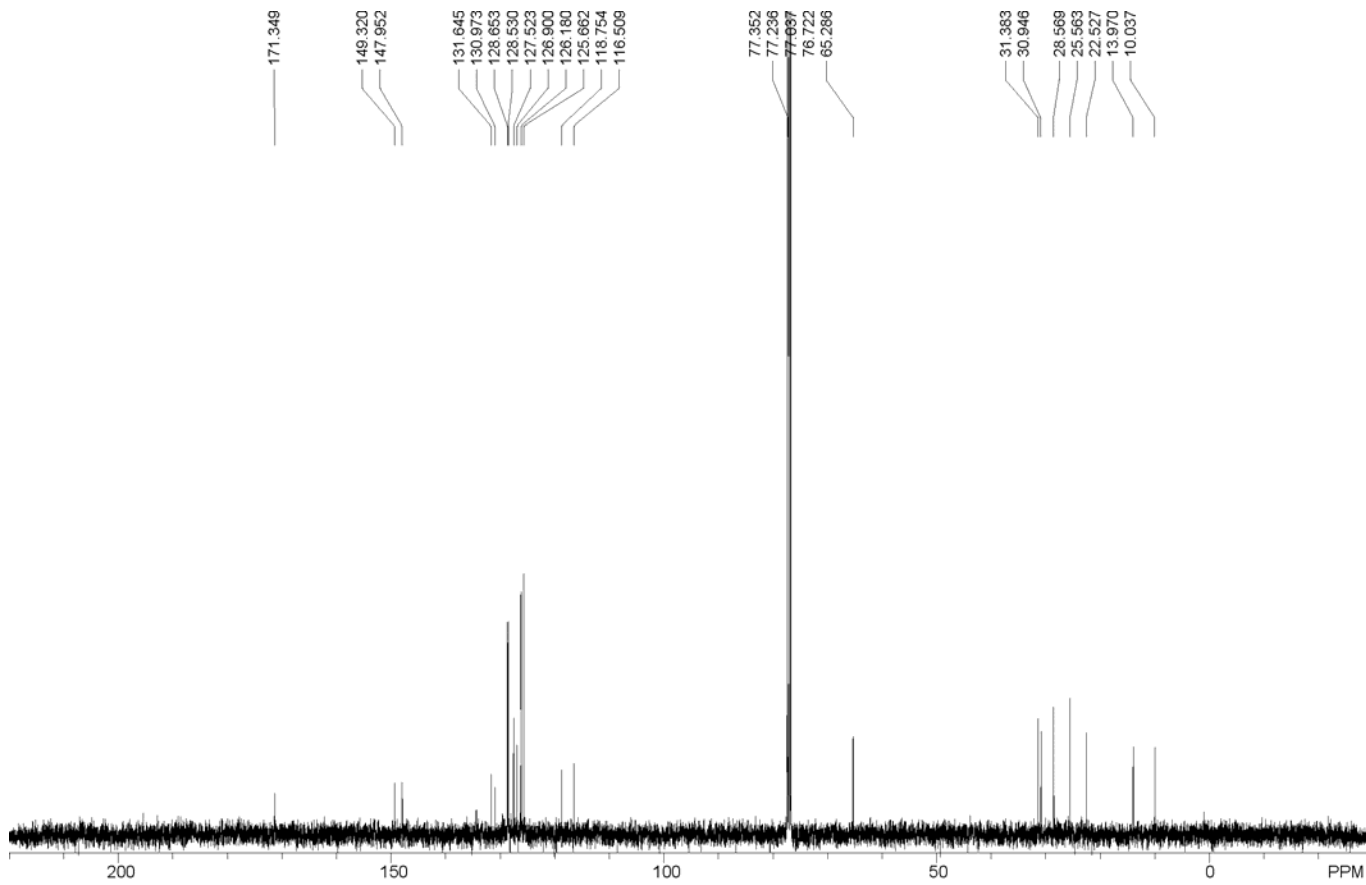

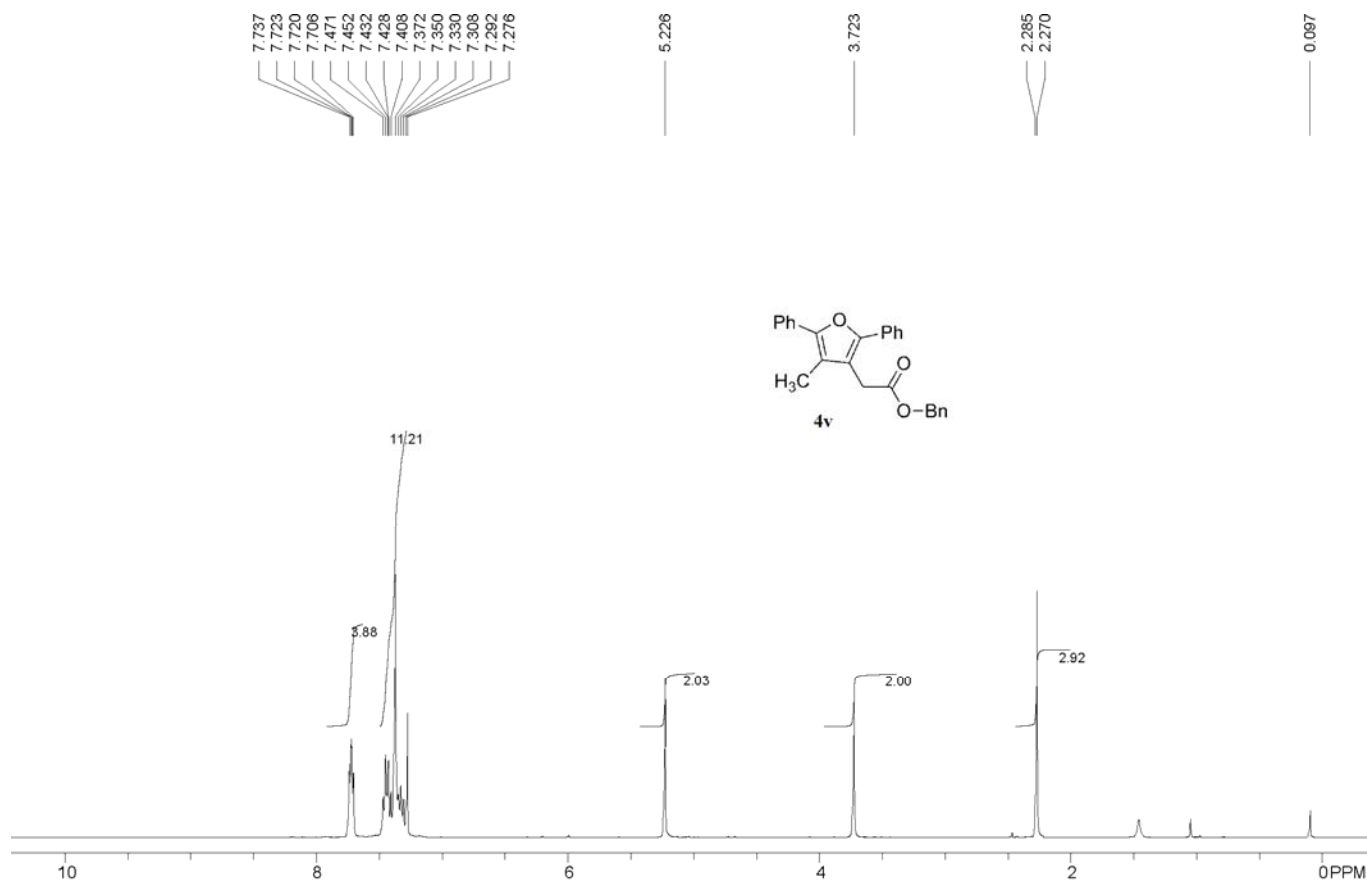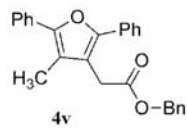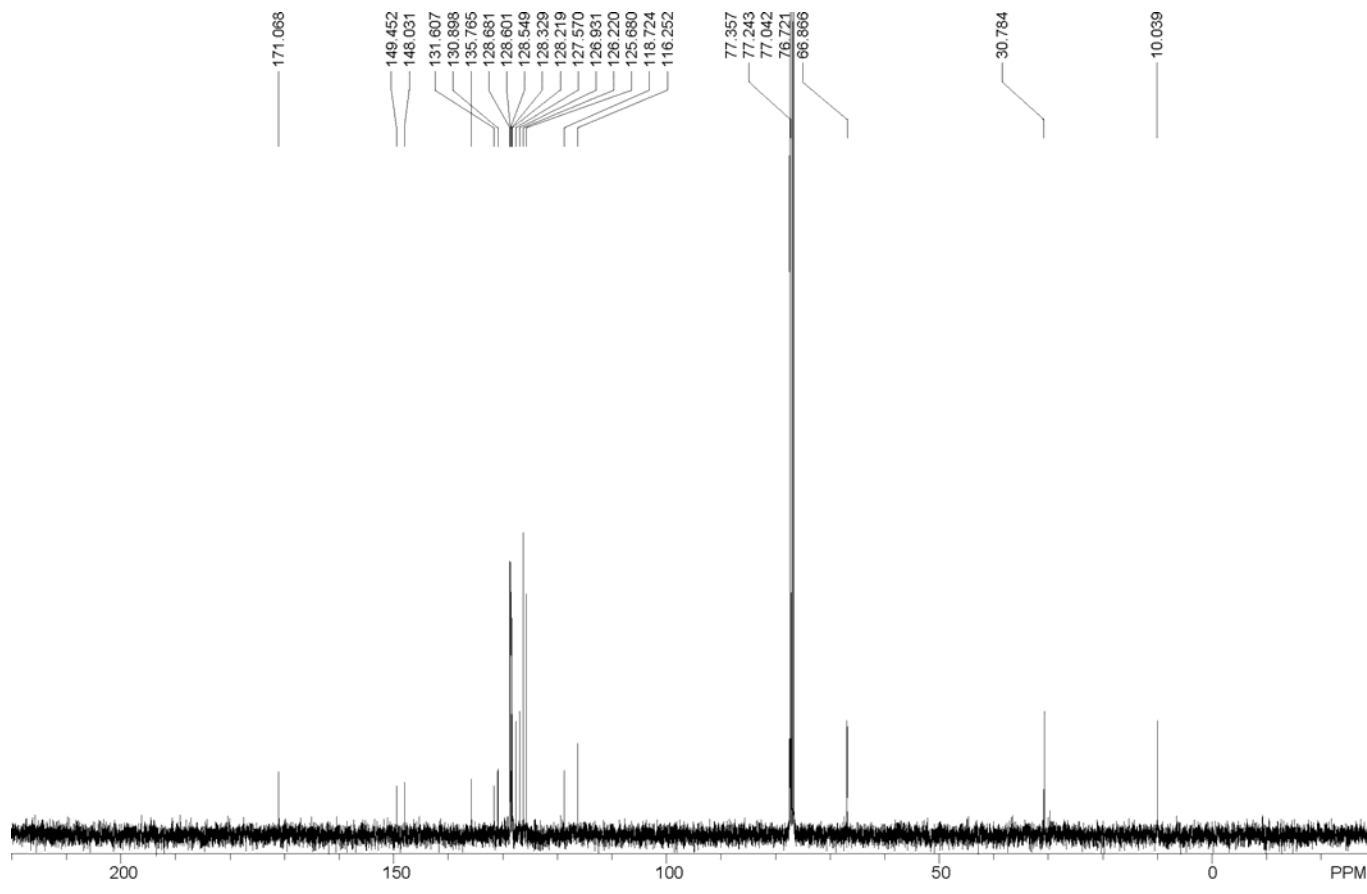

7.753  
7.732  
7.710  
7.468  
7.454  
7.451  
7.435  
7.414  
7.393  
7.357  
7.338  
7.321  
7.302  
7.278  
5.983  
5.970  
5.957  
5.941  
5.927  
5.914  
5.901  
5.880  
5.334  
5.317  
5.303  
5.272  
5.245  
4.690  
4.675

3.705

2.211

0.085

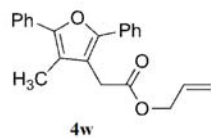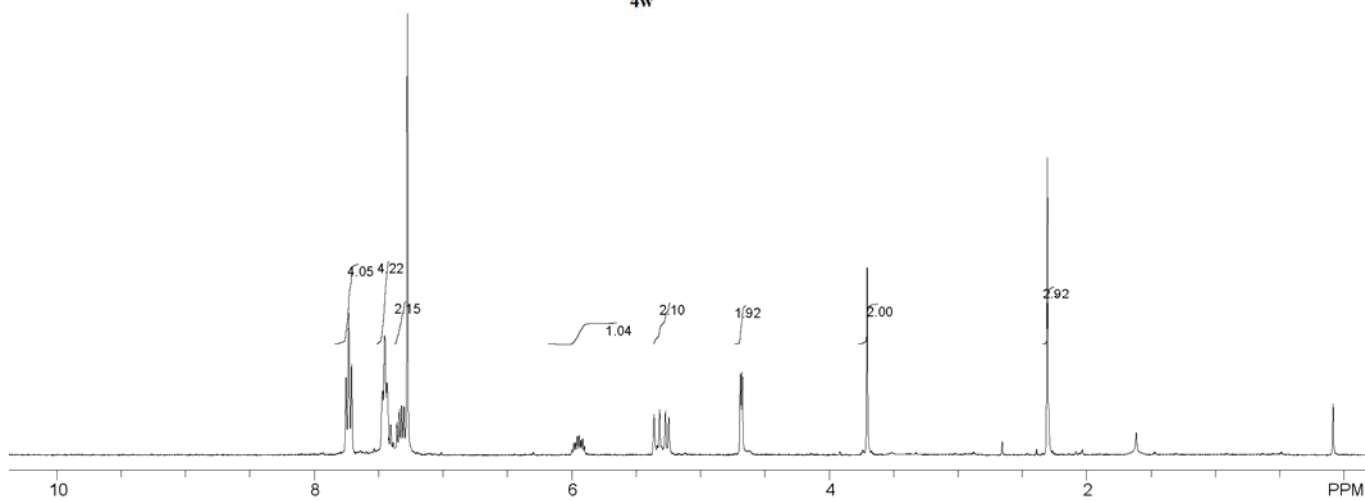

170.921  
149.443  
148.032  
131.954  
131.632  
130.938  
128.708  
128.563  
127.593  
126.952  
126.232  
125.692  
118.741  
118.470  
116.283

77.262  
77.051  
76.839

65.706

30.750

10.067

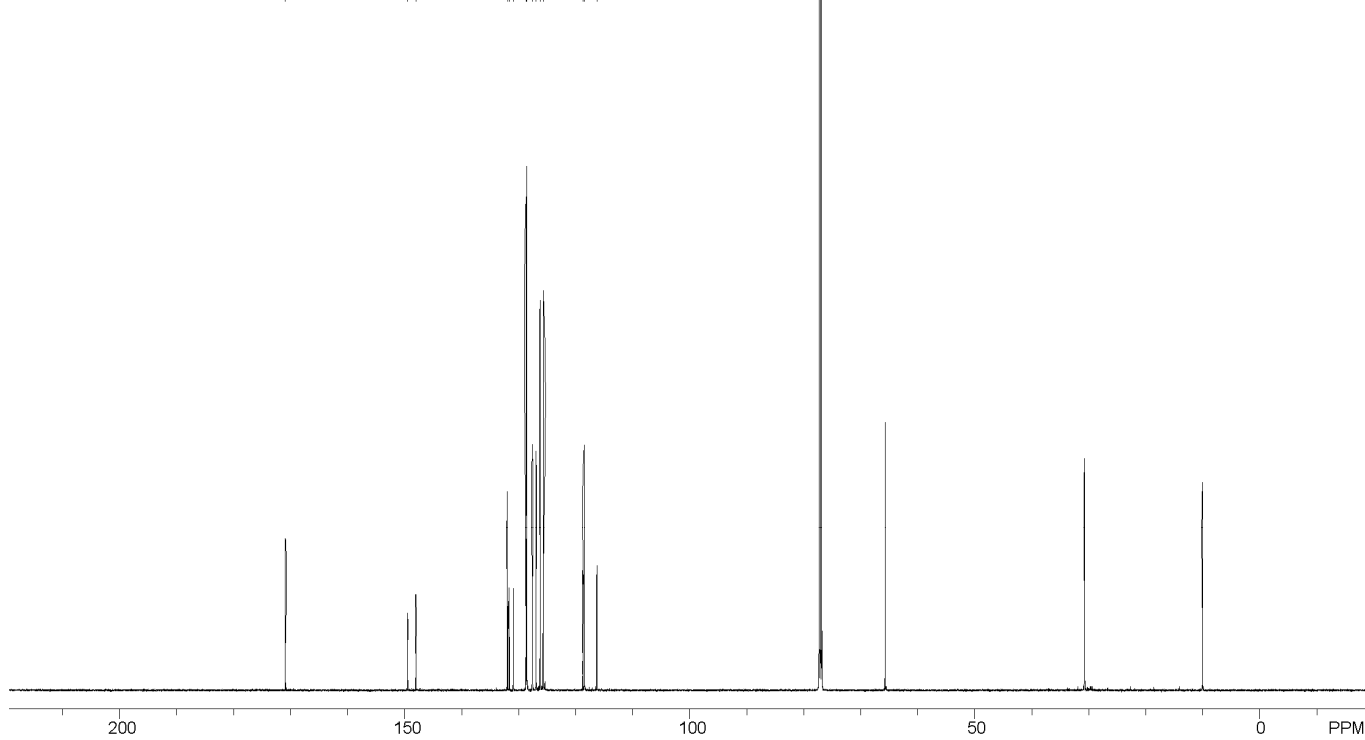

7.841  
7.821  
7.824  
7.608  
7.572  
7.546  
7.526  
7.297  
7.276  
7.247  
7.228  
6.985  
6.934

4.956

3.943  
3.935

2.320

1.268  
1.223

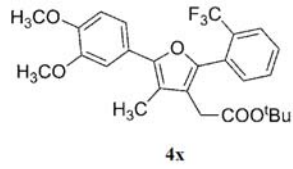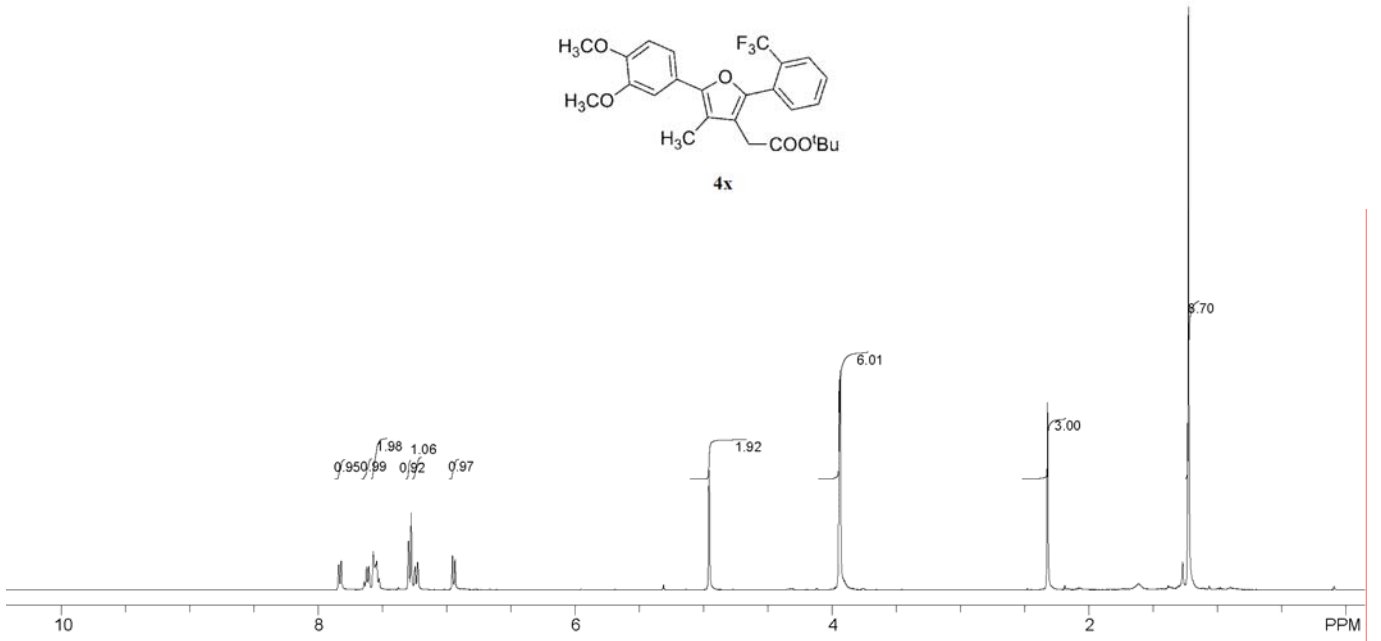

178.385

149.178  
149.108  
148.427  
147.976

131.881  
131.596  
128.904  
128.516  
127.061  
127.011  
124.394  
122.514  
120.292  
118.333  
116.302  
111.184  
109.081  
109.016

77.345  
77.231  
77.027  
76.702

57.259  
55.935  
55.773

38.871

27.148

9.831

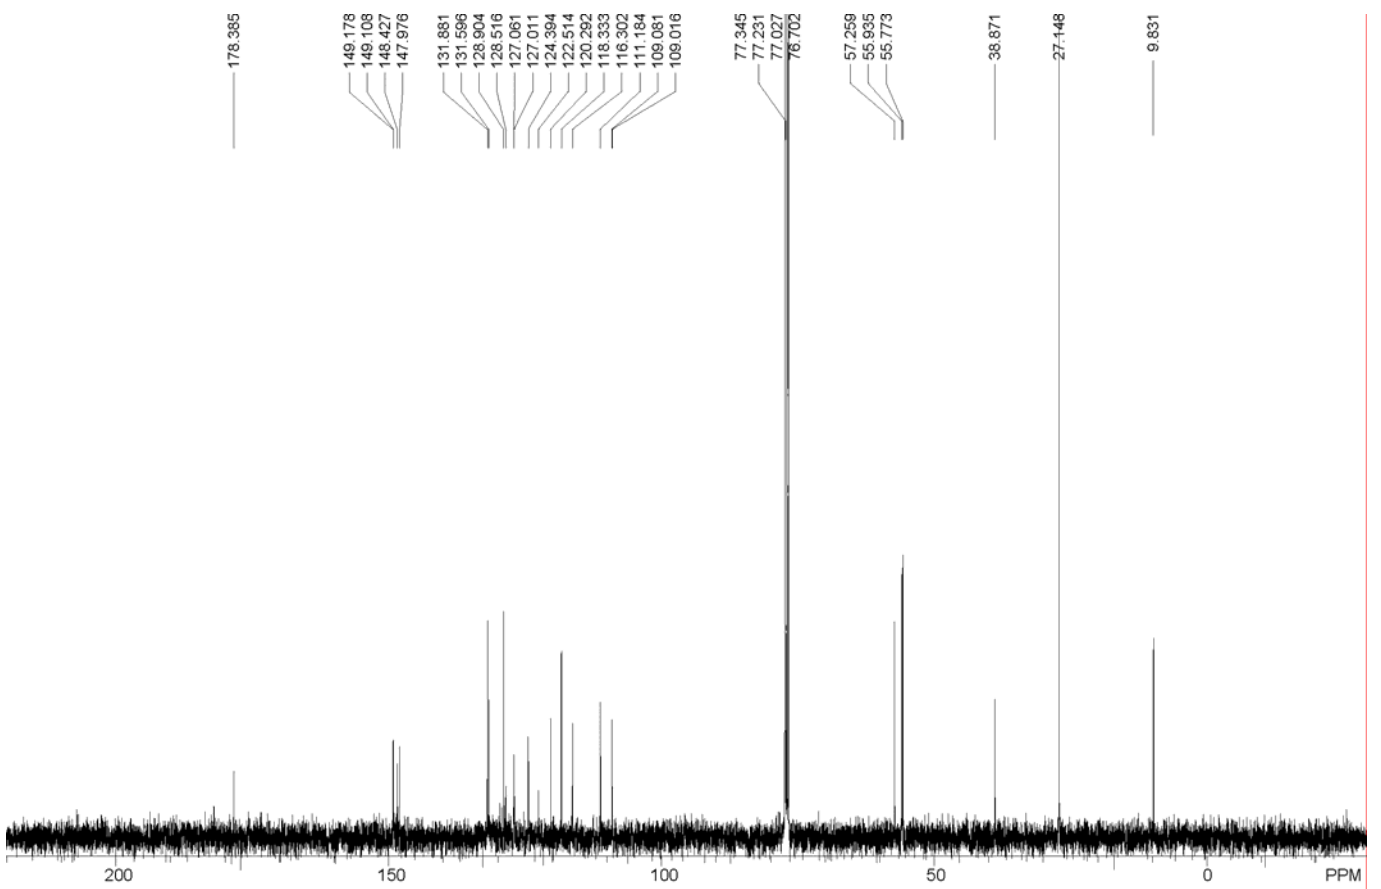

#### IV. Copies of $^1\text{H}$ and $^{13}\text{C}$ NMR spectra of 6a-6j

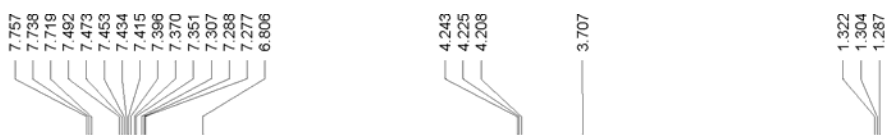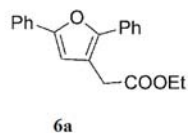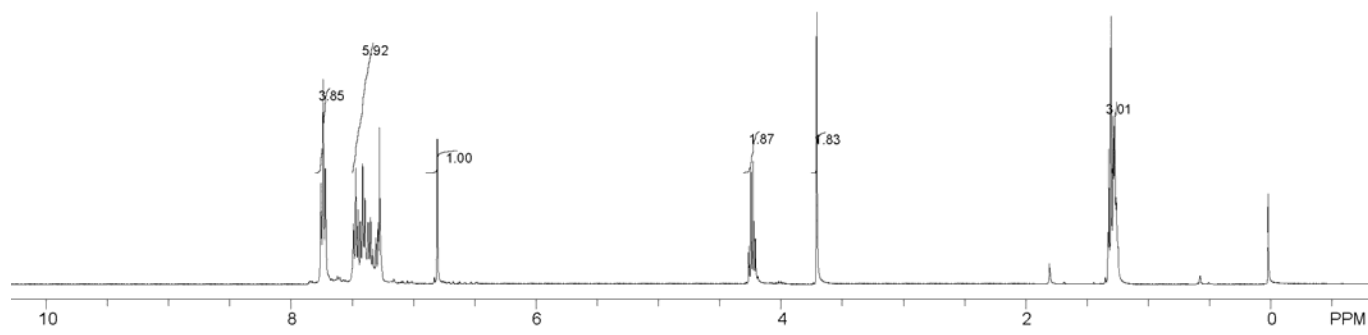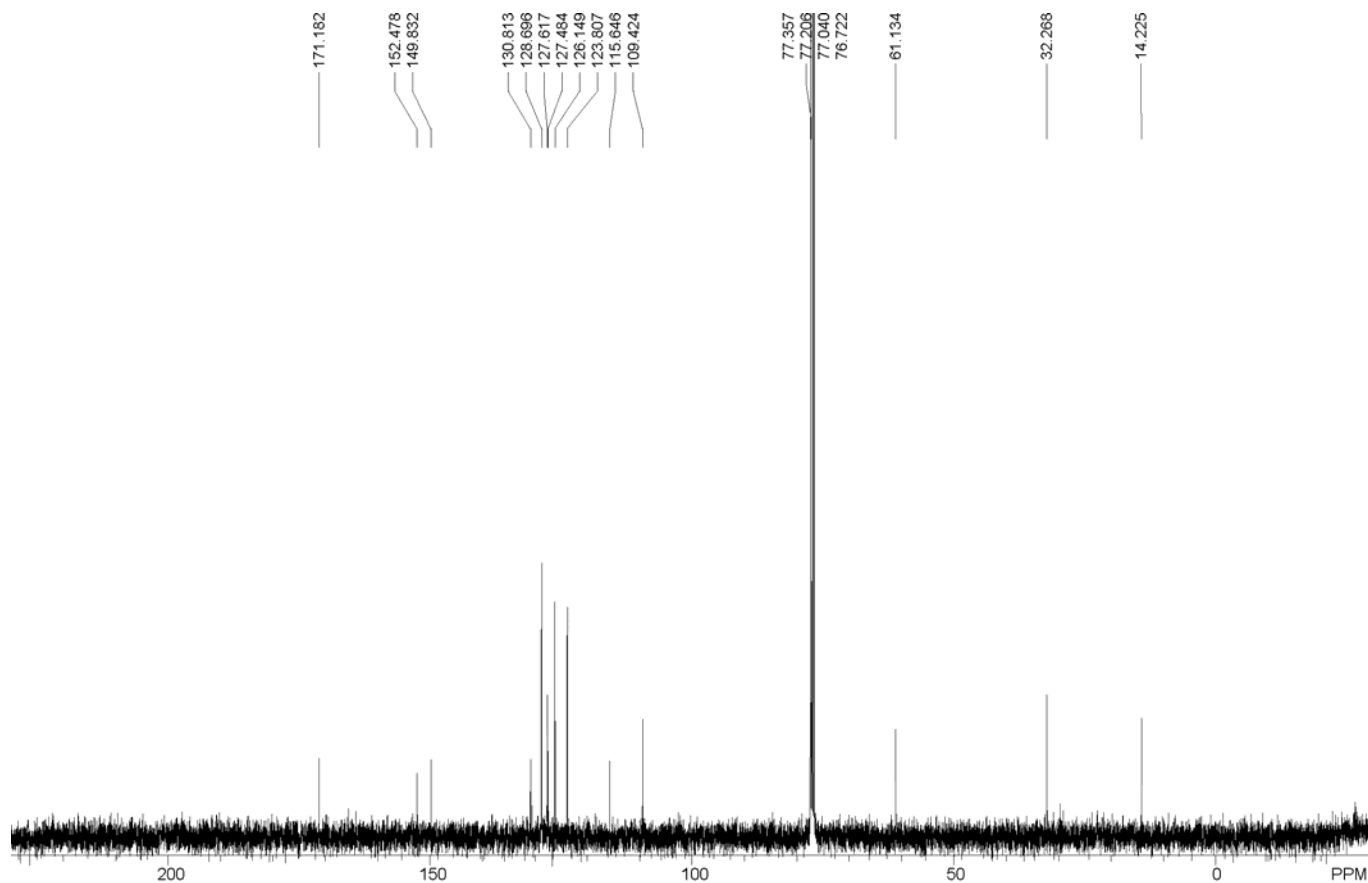



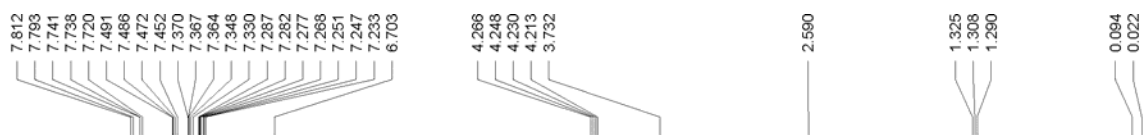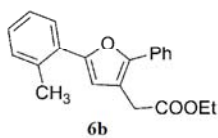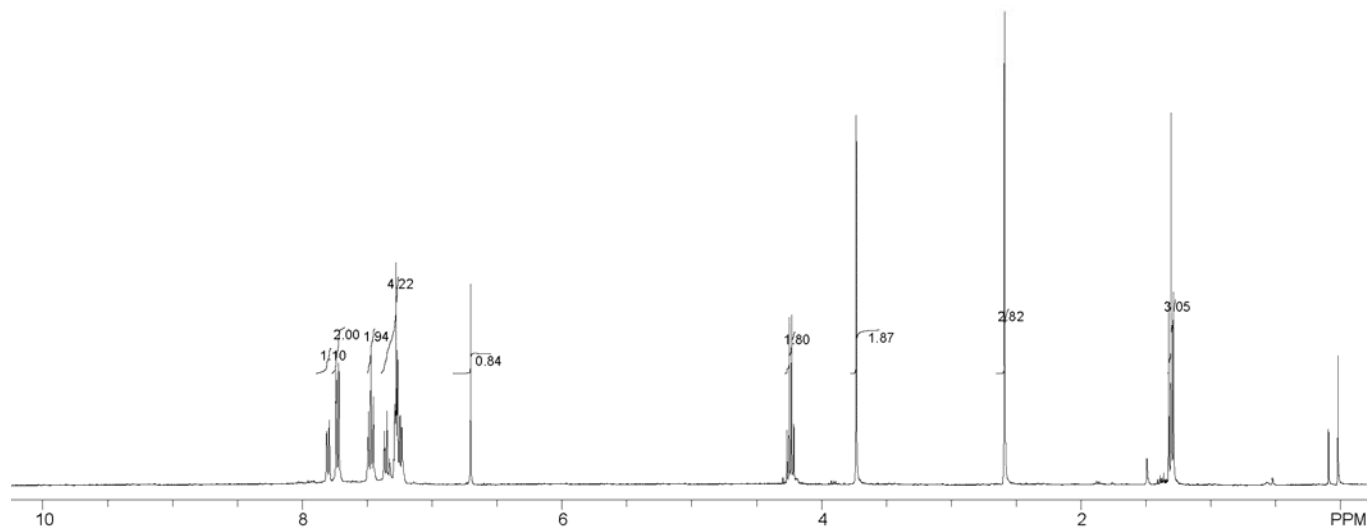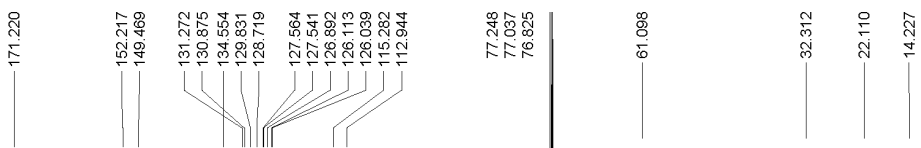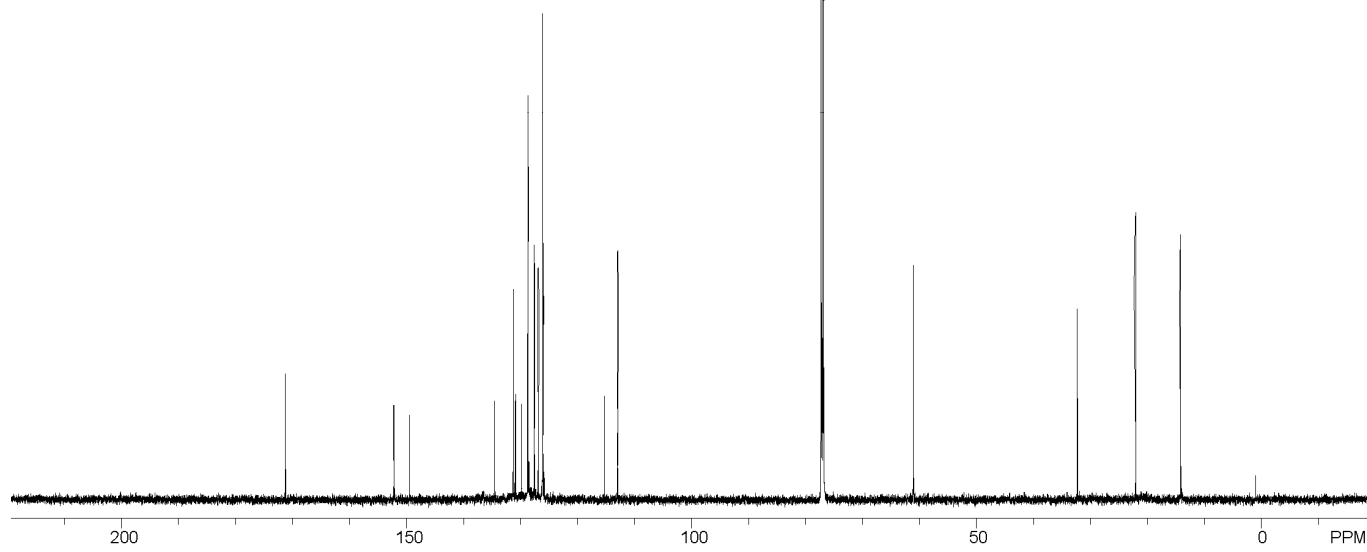

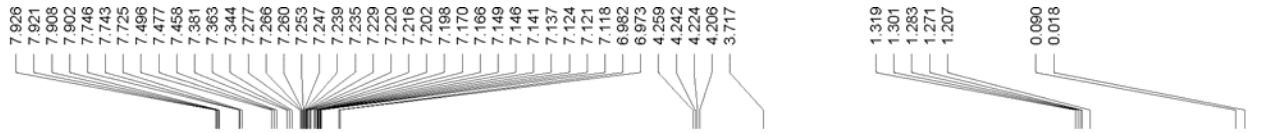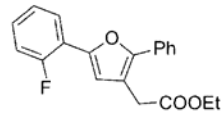

6c

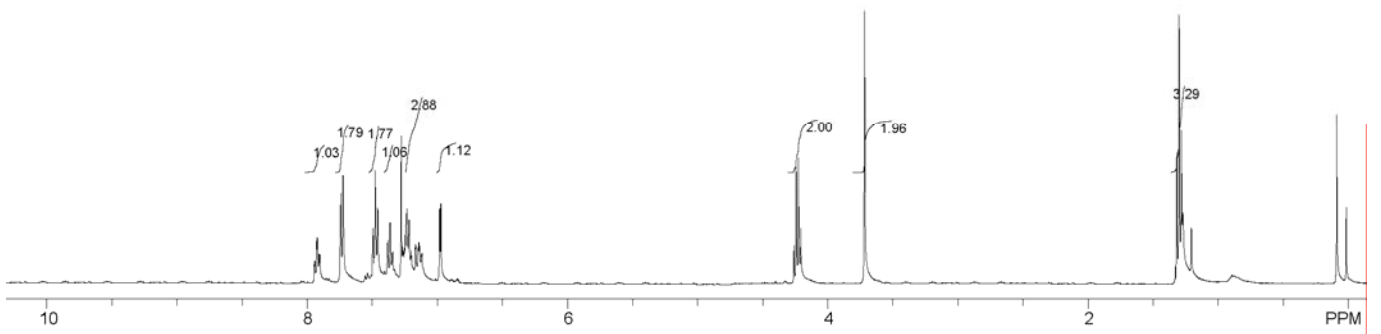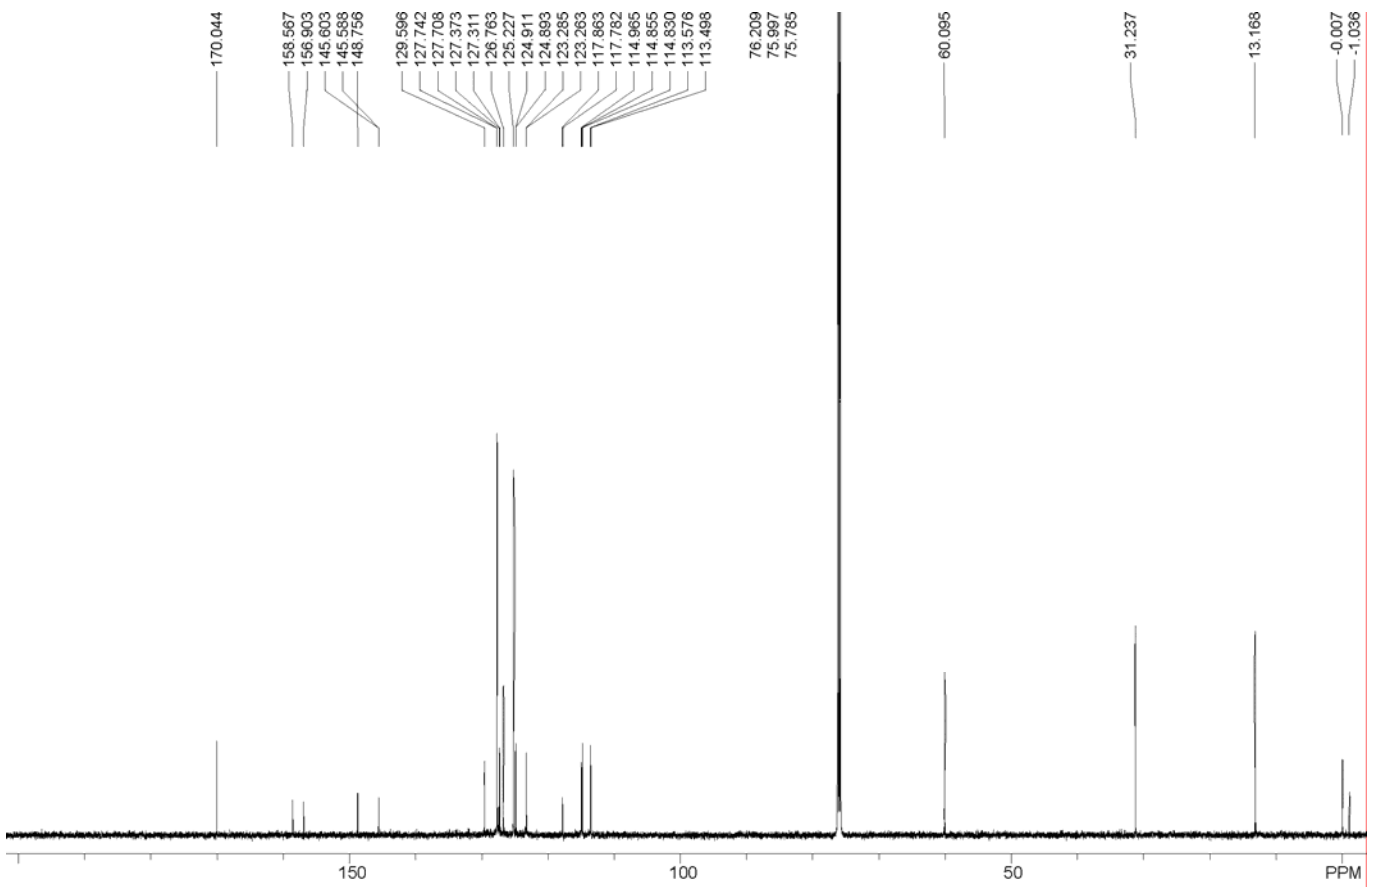

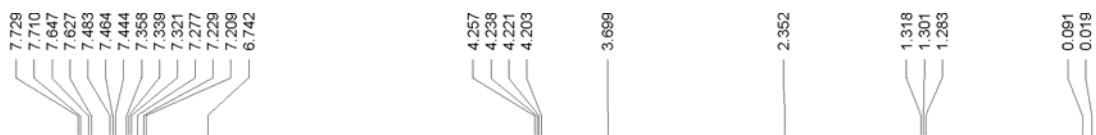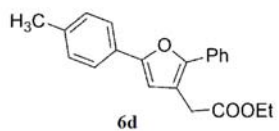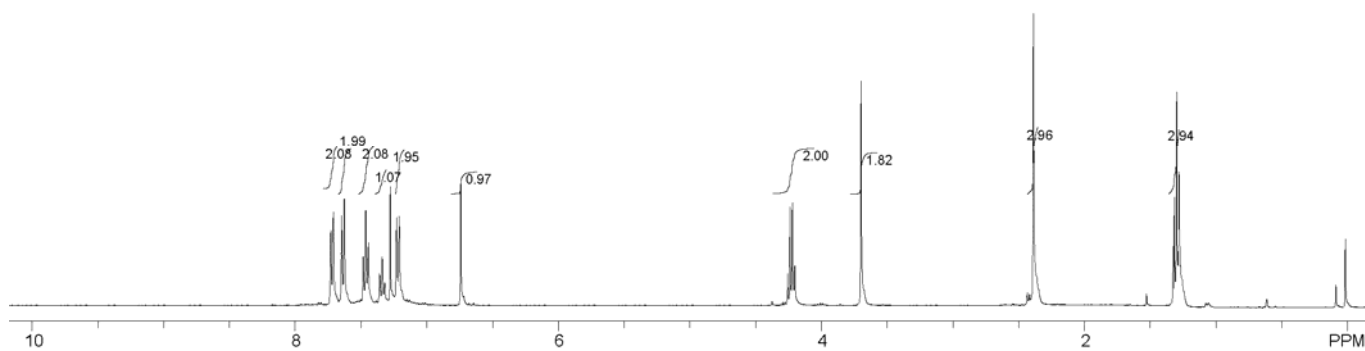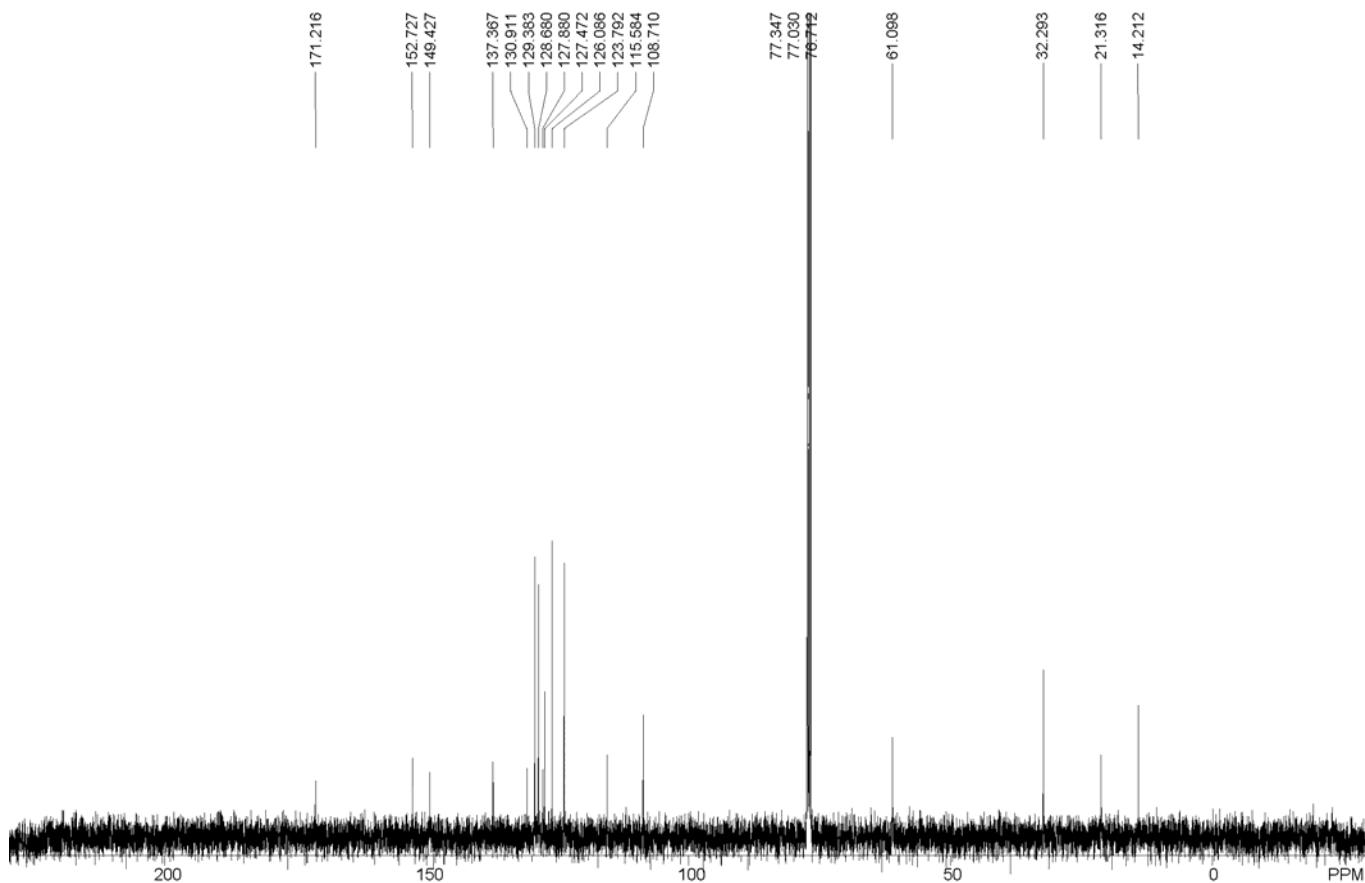

7.717  
7.715  
7.697  
7.672  
7.650  
7.490  
7.471  
7.385  
7.380  
7.363  
7.342  
7.339  
7.276  
6.794

4.258  
4.240  
4.222  
4.205

3.697

1.321  
1.303  
1.285

0.092  
0.018

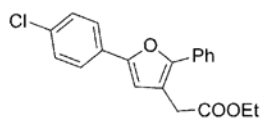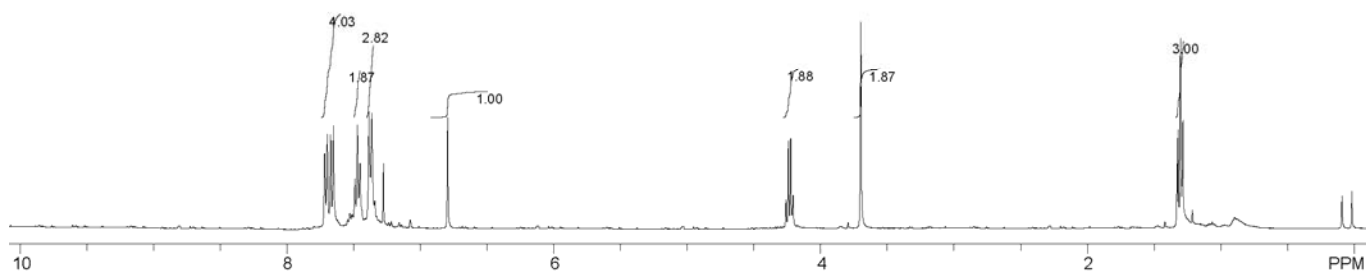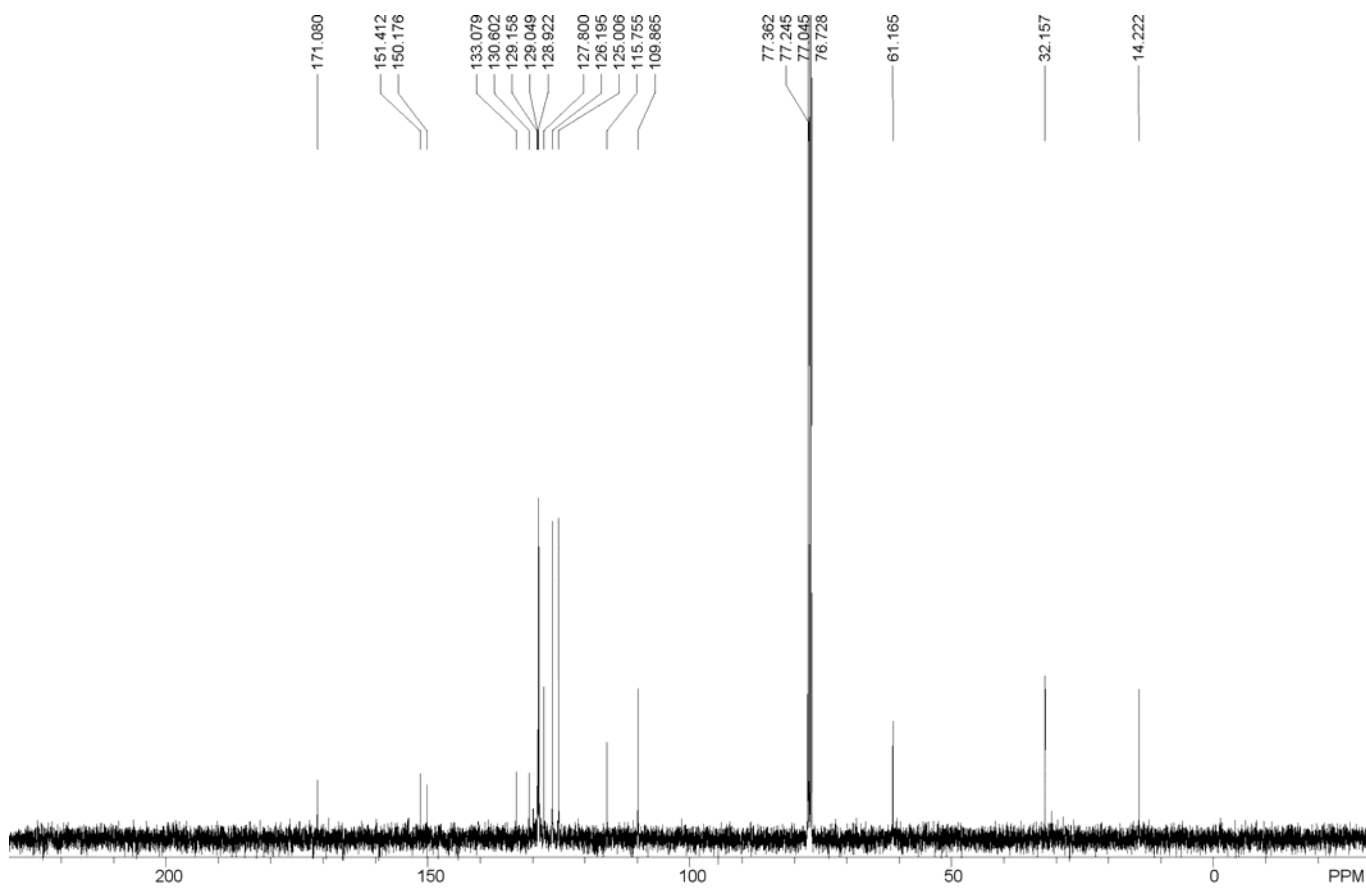

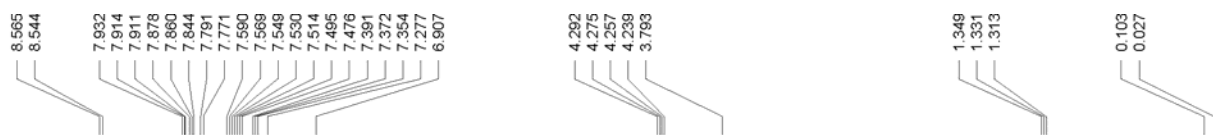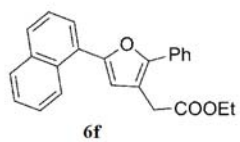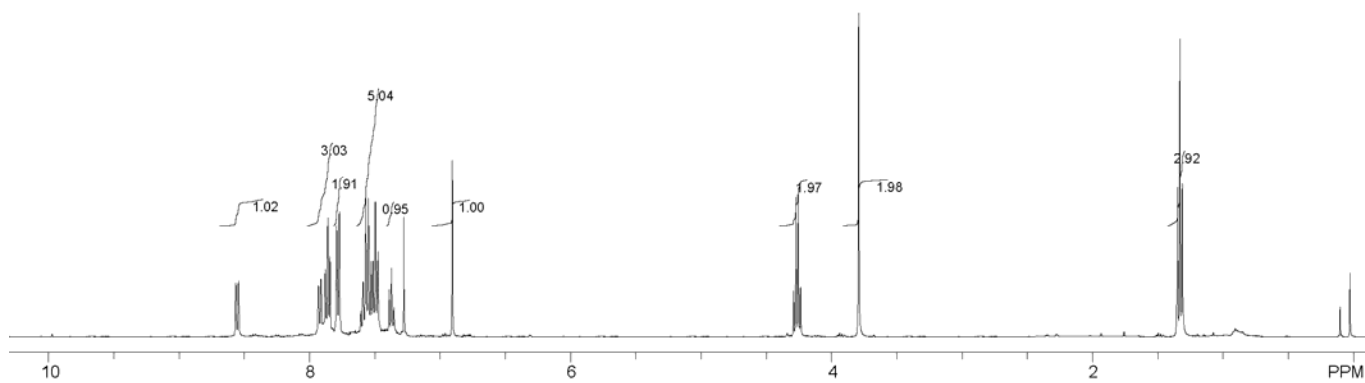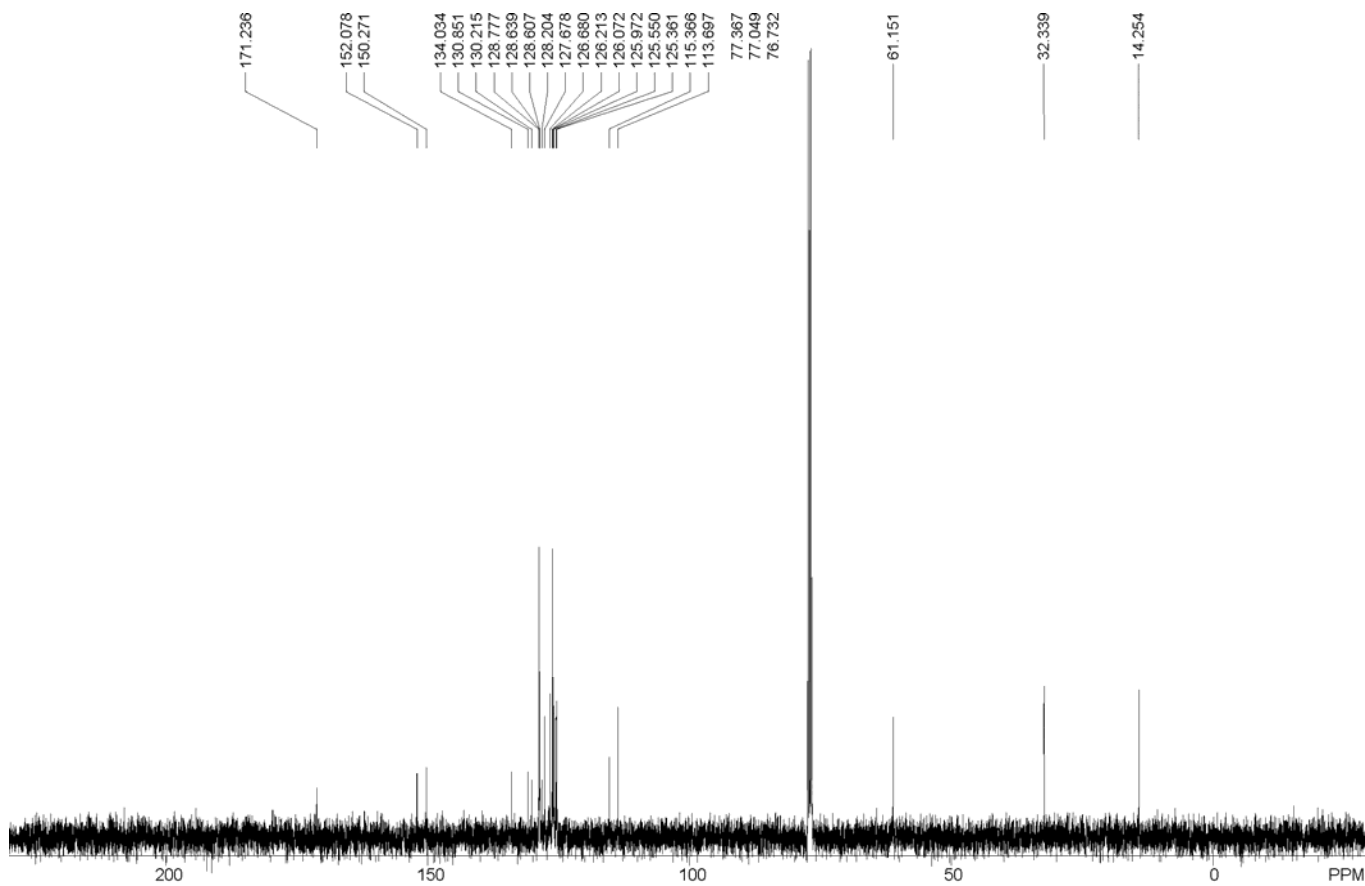

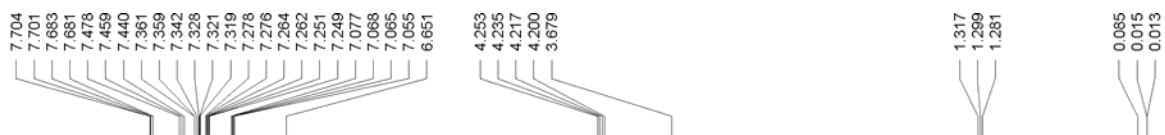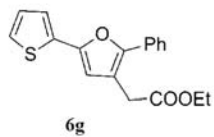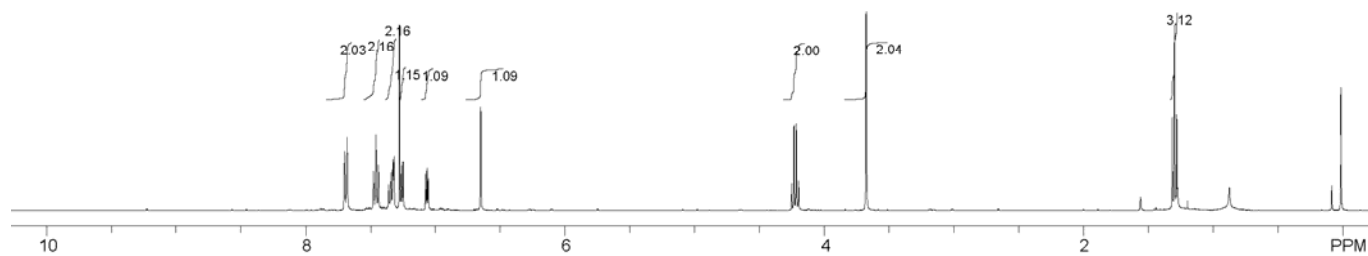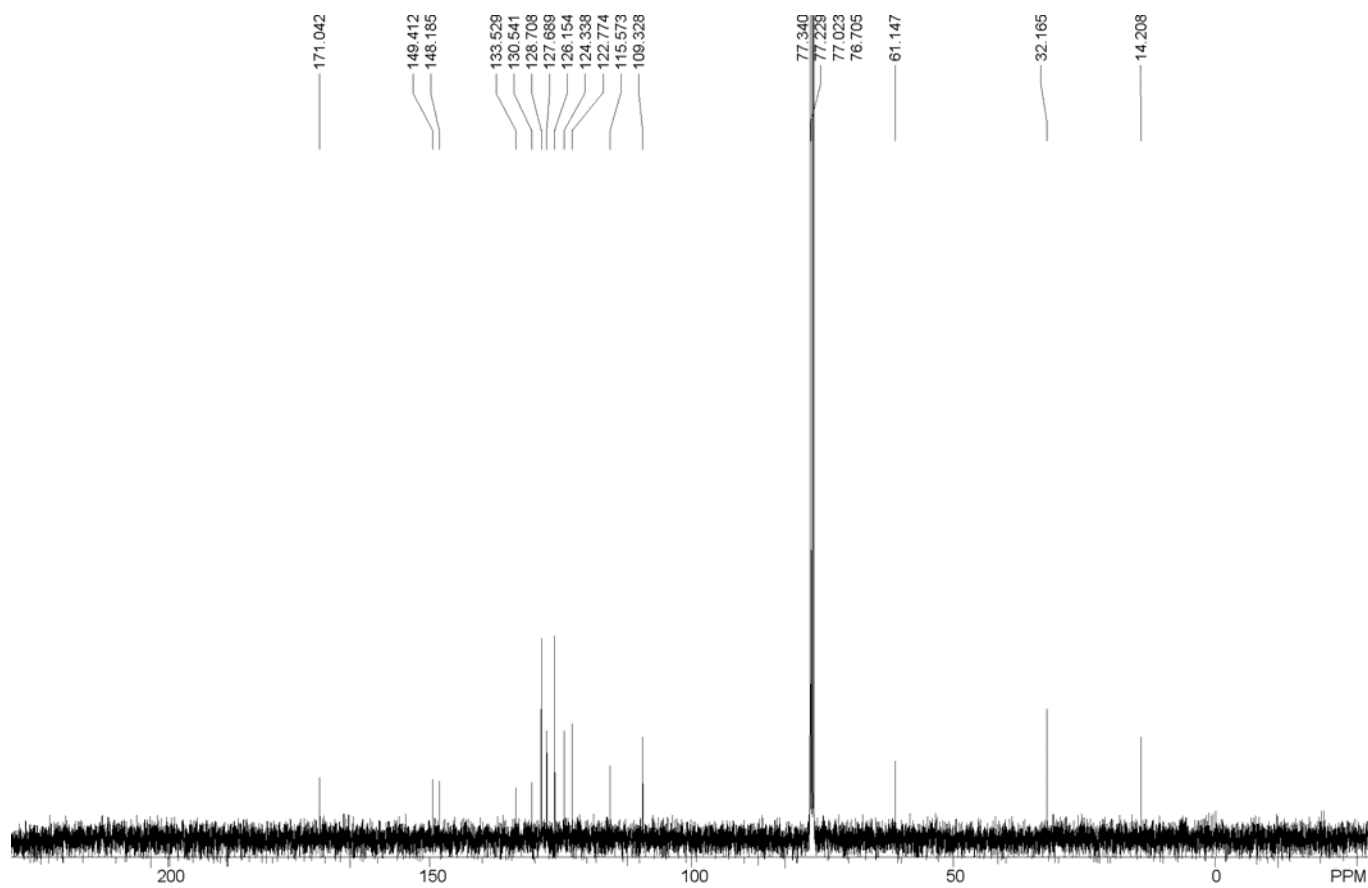

7.731  
7.712  
7.667  
7.645  
7.519  
7.507  
7.488  
7.467  
7.418  
7.412  
7.399  
7.379  
7.363  
7.288  
7.276  
7.261  
6.774

4.232  
4.215  
3.886  
3.875  
3.868  
3.655

1.317  
1.312  
1.300  
1.282

0.025  
0.012

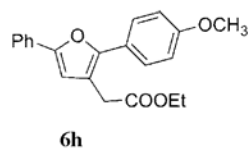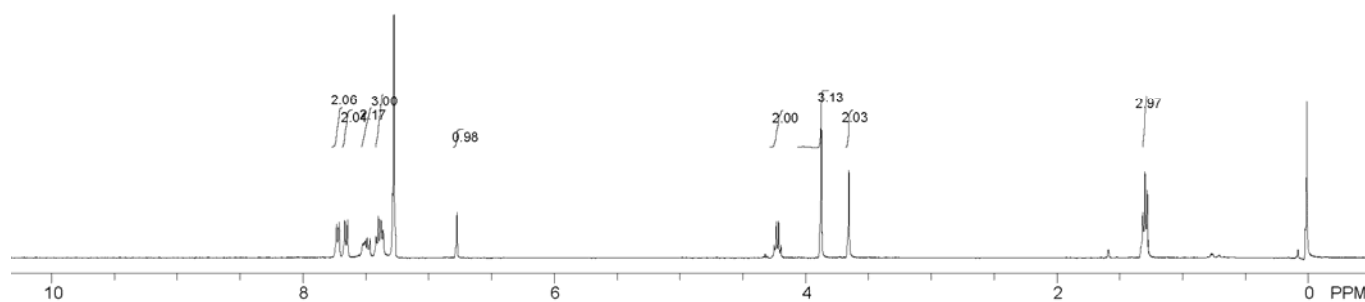

171.418

159.299

151.912

130.759

129.527

128.665

128.027

127.685

126.342

124.849

123.652

114.184

109.261

77.232

77.020

76.809

61.082

55.955

32.243

14.226

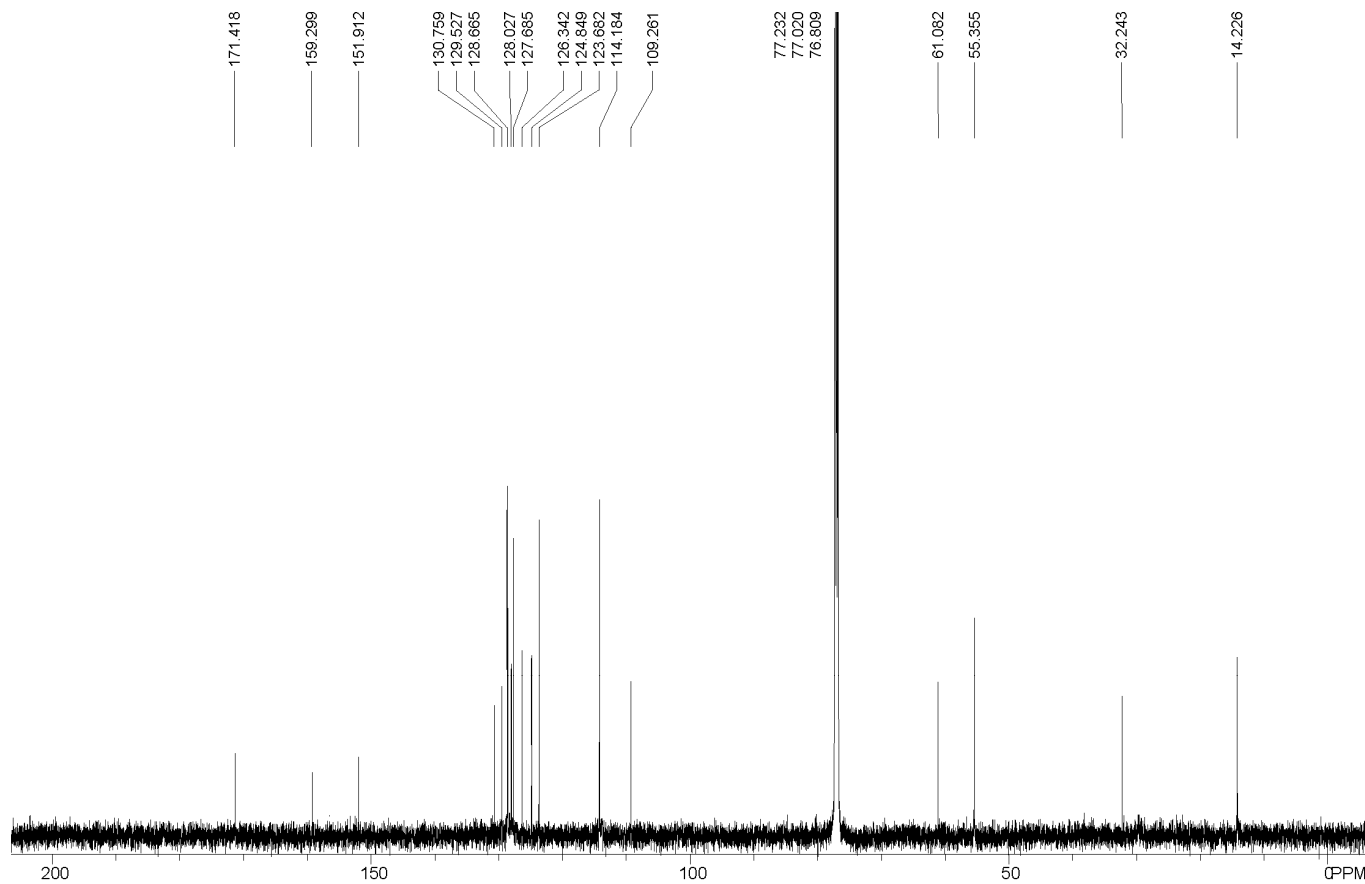

7.737  
7.718  
7.674  
7.653  
7.440  
7.432  
7.419  
7.413  
7.393  
7.374  
7.358  
7.313  
7.283  
7.287  
7.274  
6.788

4.252  
4.234  
4.216  
3.666

1.316  
1.298  
1.280

0.031  
0.012

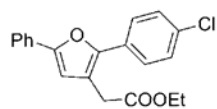

6i

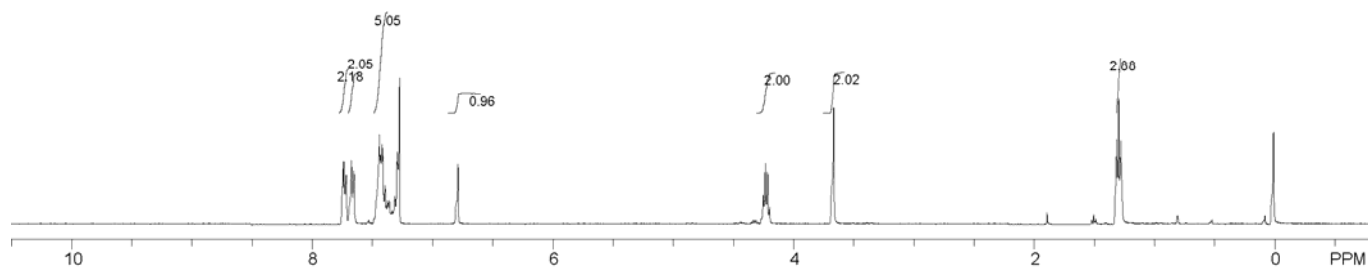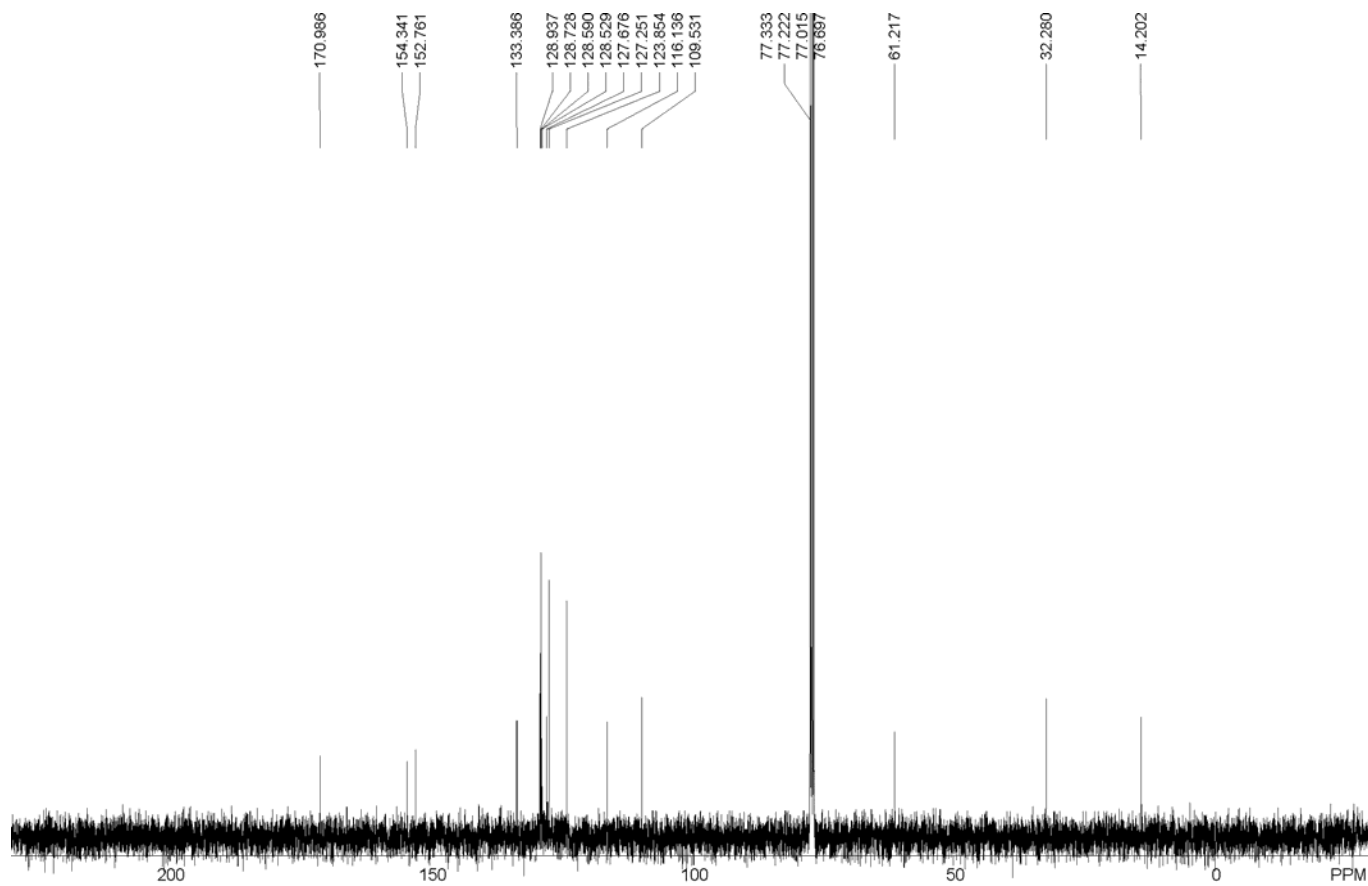



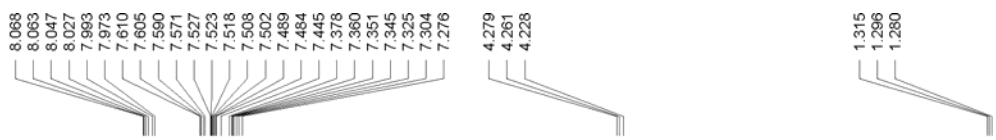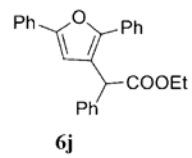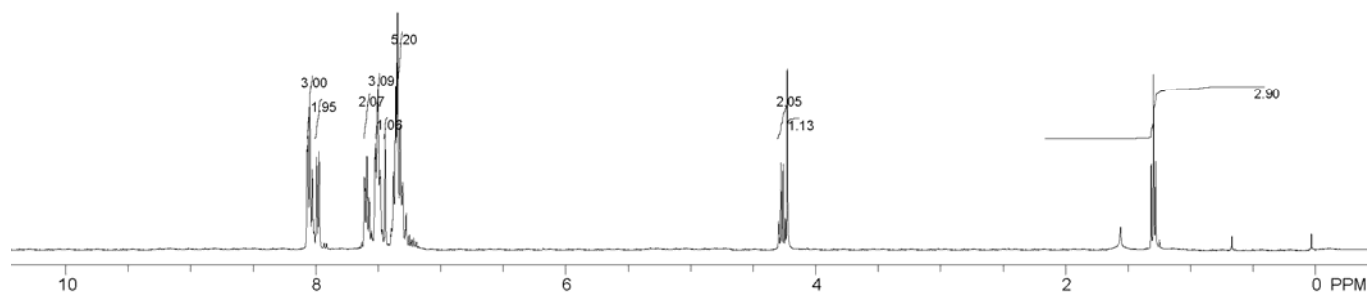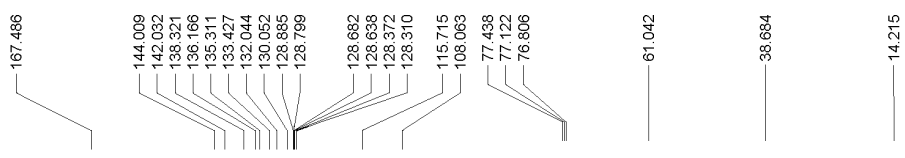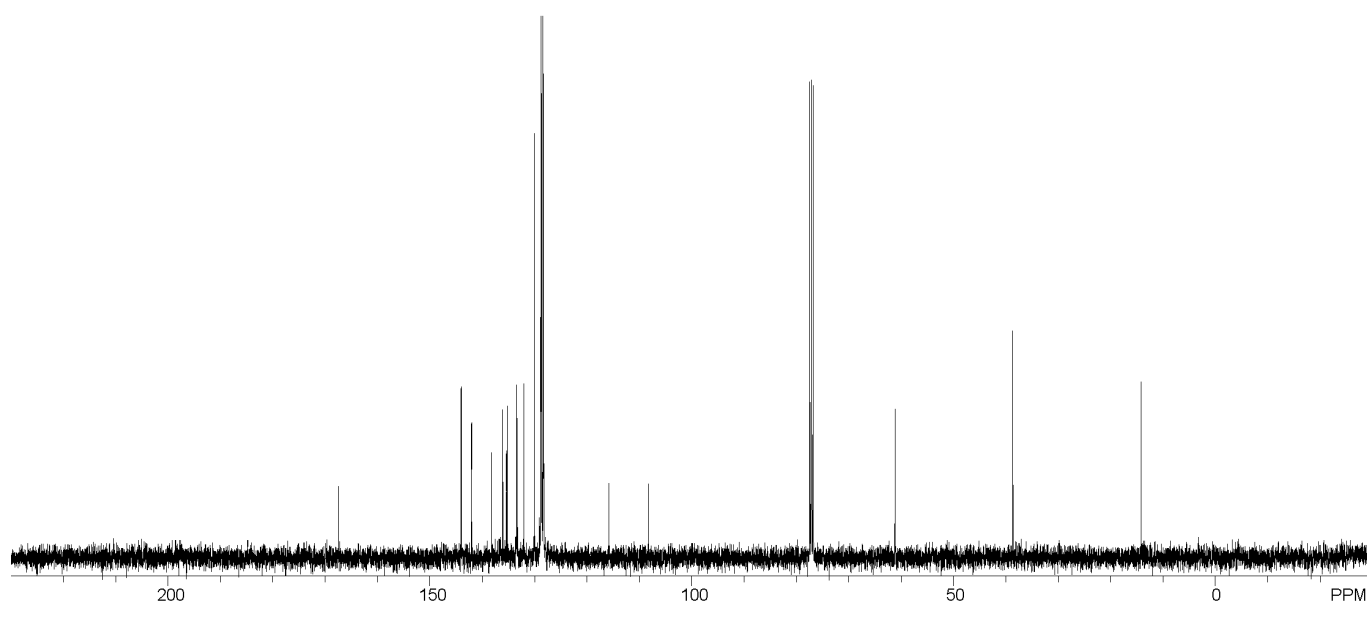

## V. Copies of $^1\text{H}$ and $^{13}\text{C}$ NMR spectra of 7a-7d

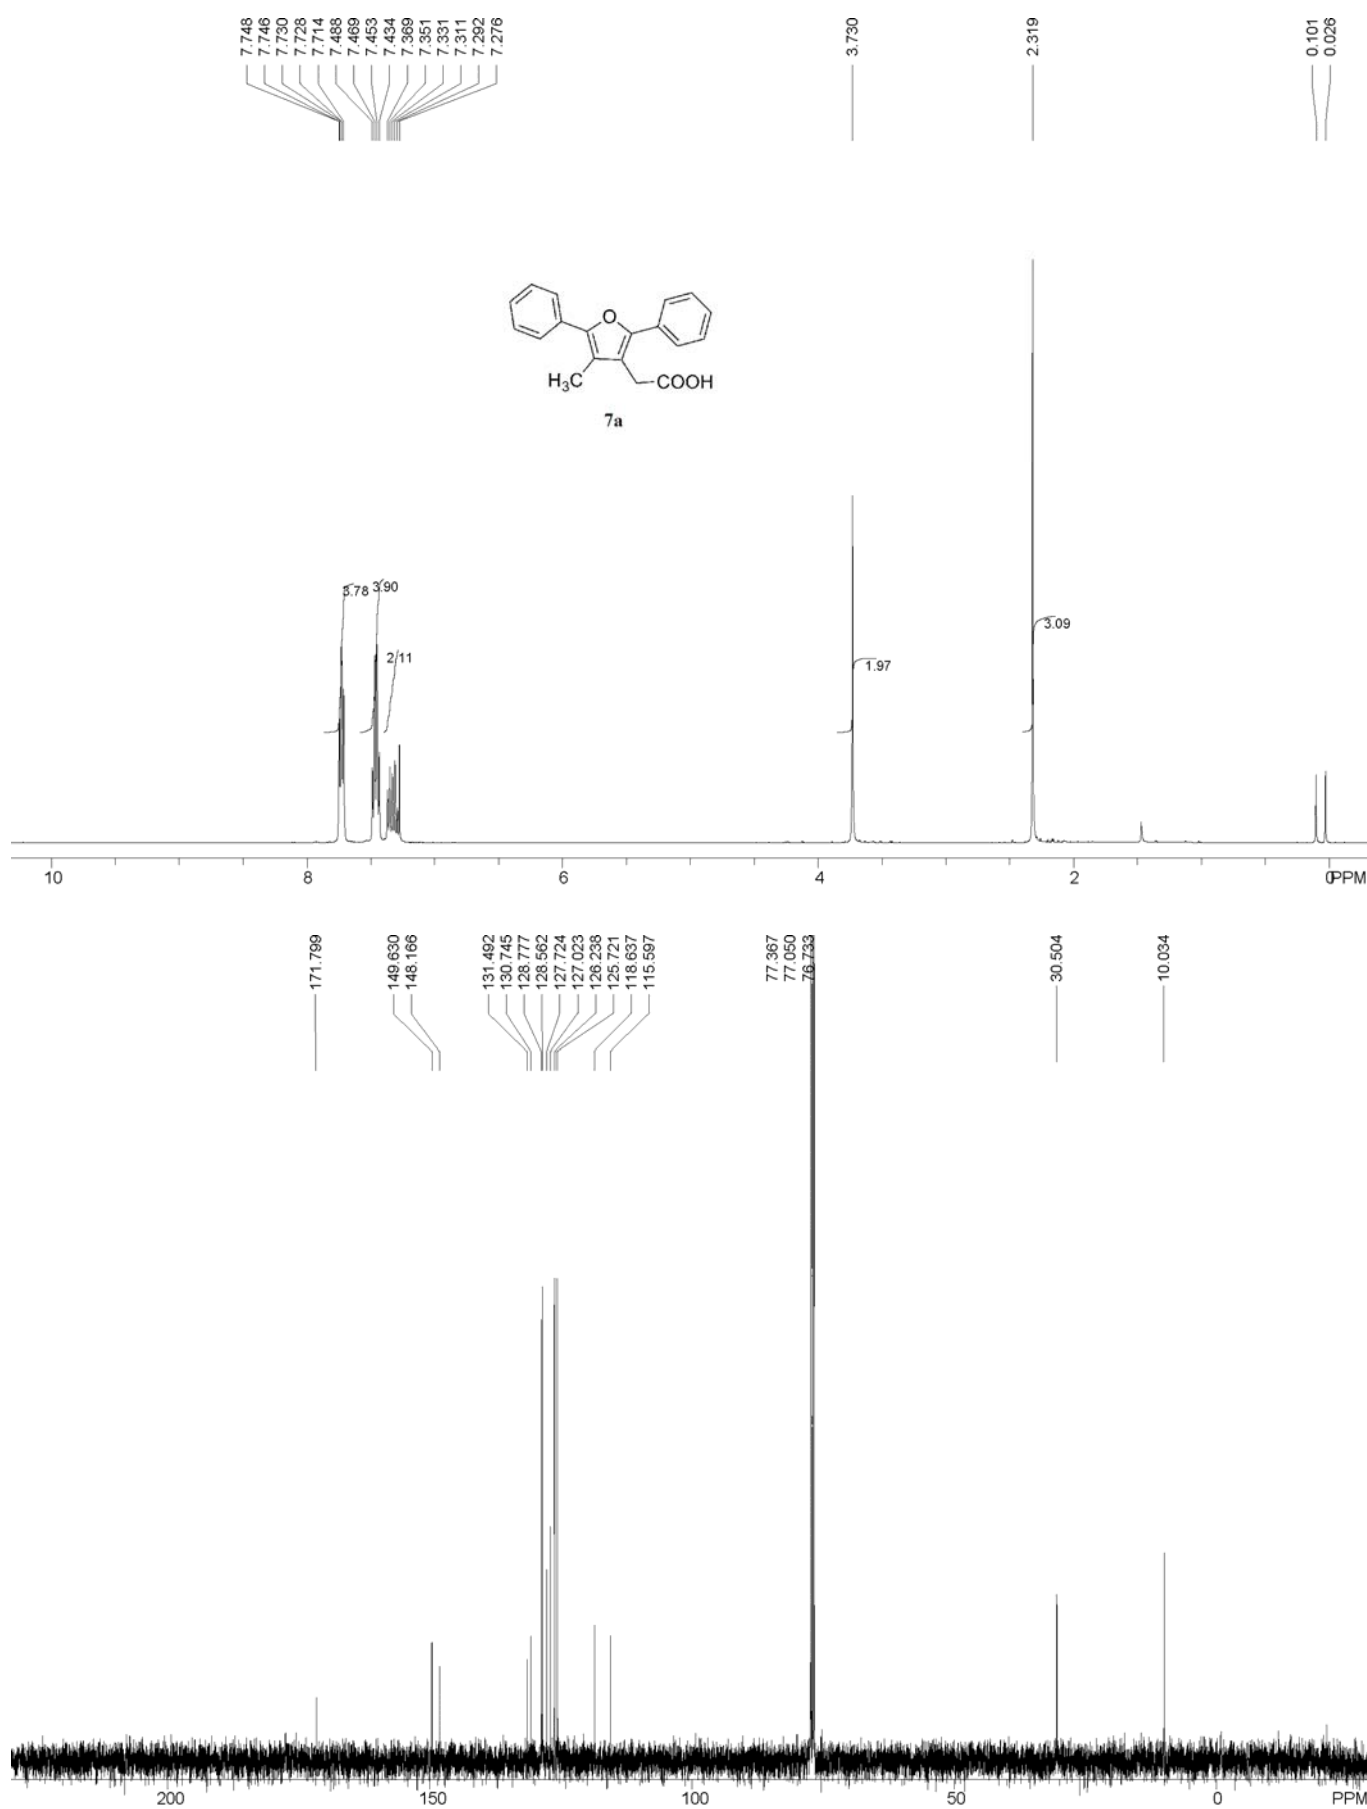

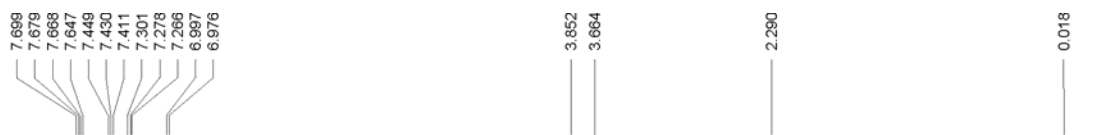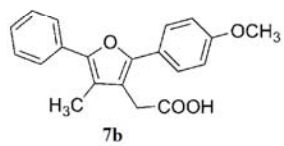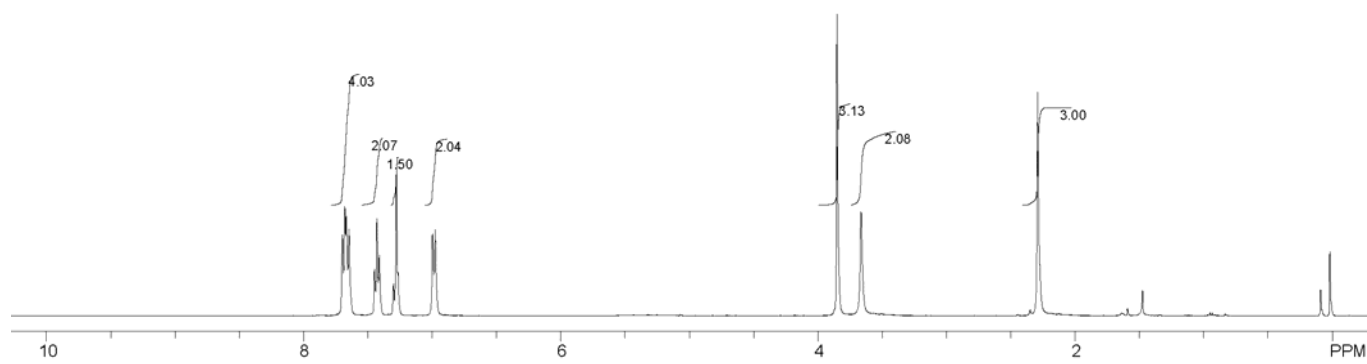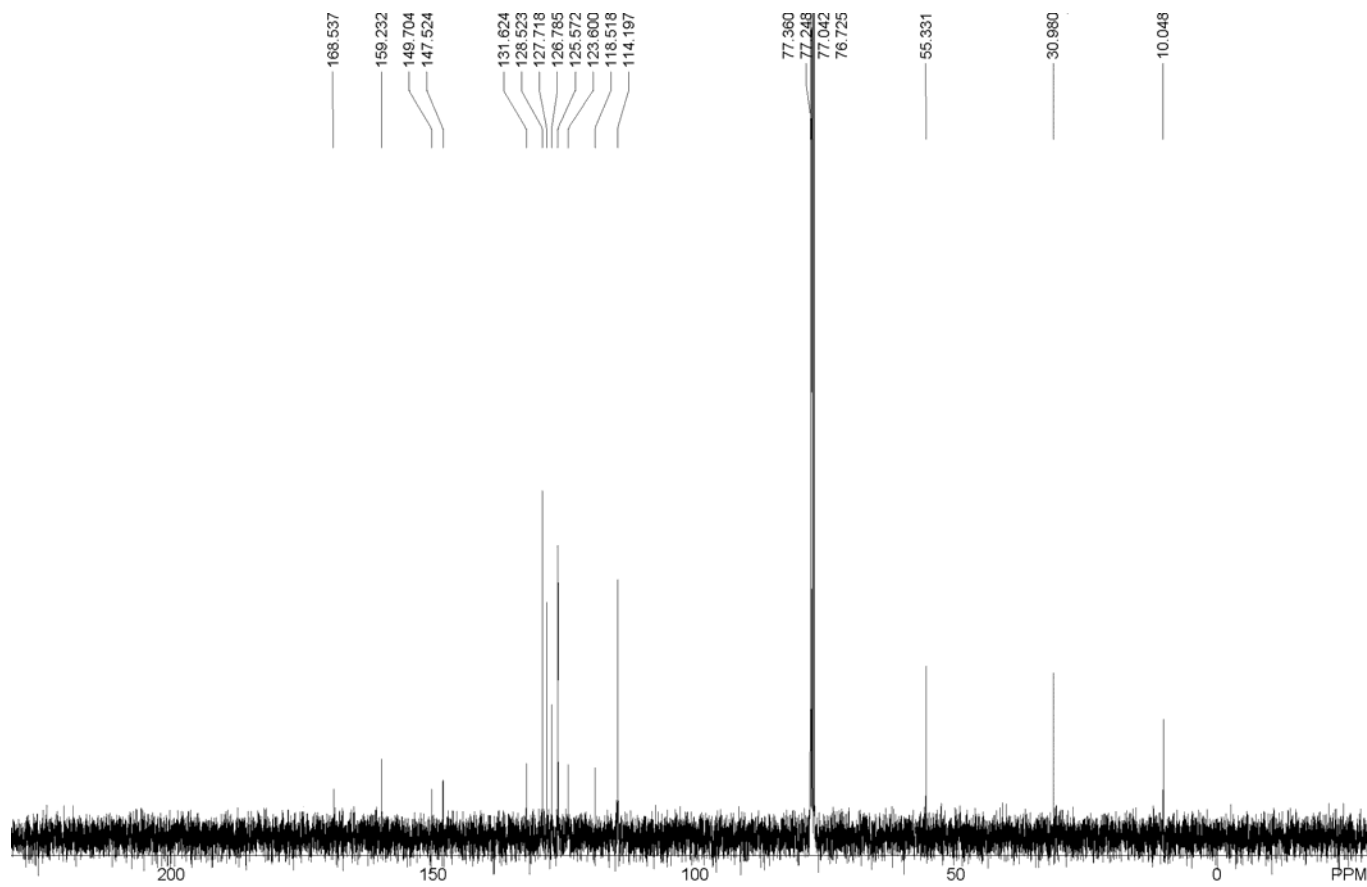

7.724  
7.705  
7.469  
7.450  
7.431  
7.410  
7.393  
7.347  
7.328  
7.320  
7.312  
7.288  
7.276

3.740  
2.445  
2.112

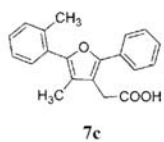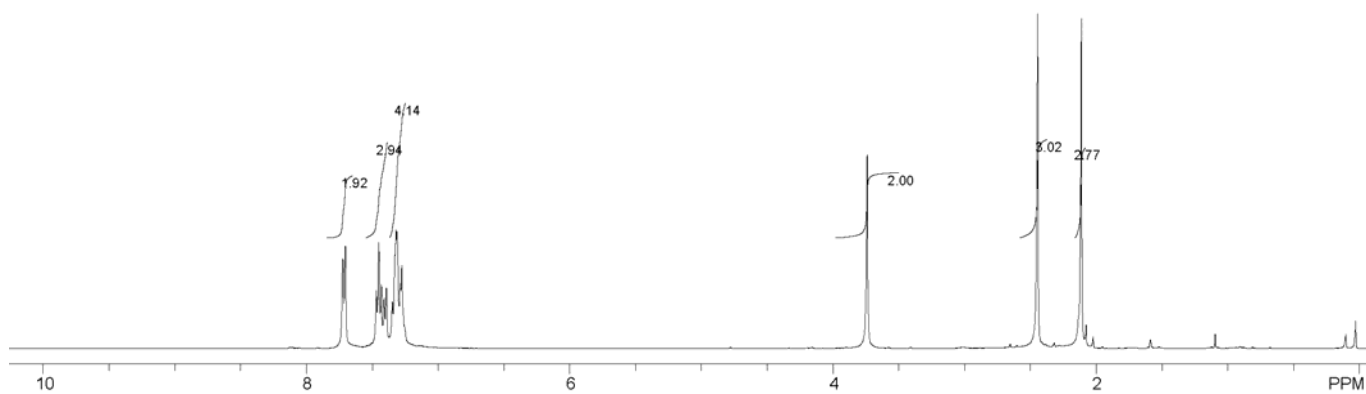

177.540  
149.766  
149.206  
130.943  
137.594  
130.739  
130.402  
130.027  
128.741  
128.322  
127.537  
126.019  
125.497  
119.370  
114.548  
77.364  
77.047  
76.729  
76.619  
30.798  
20.693  
9.463

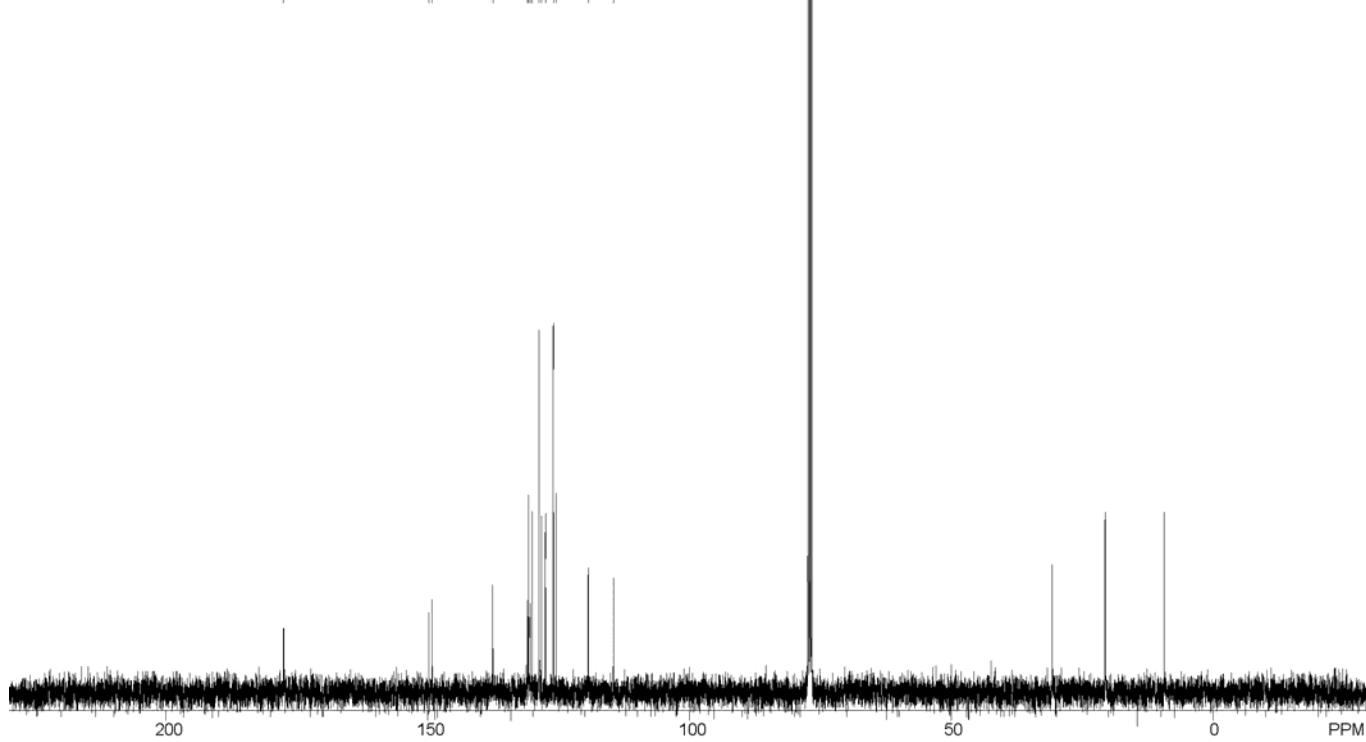

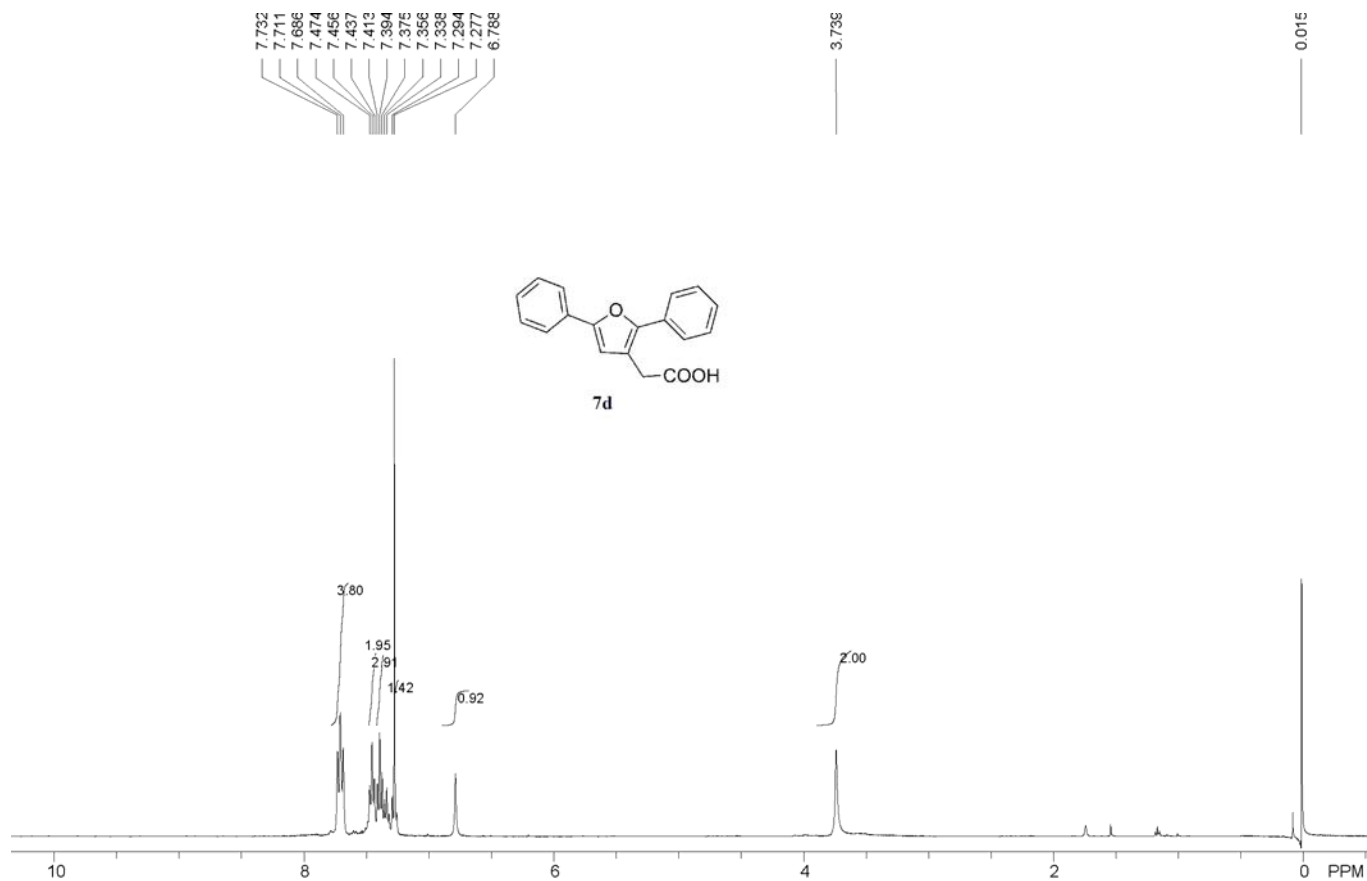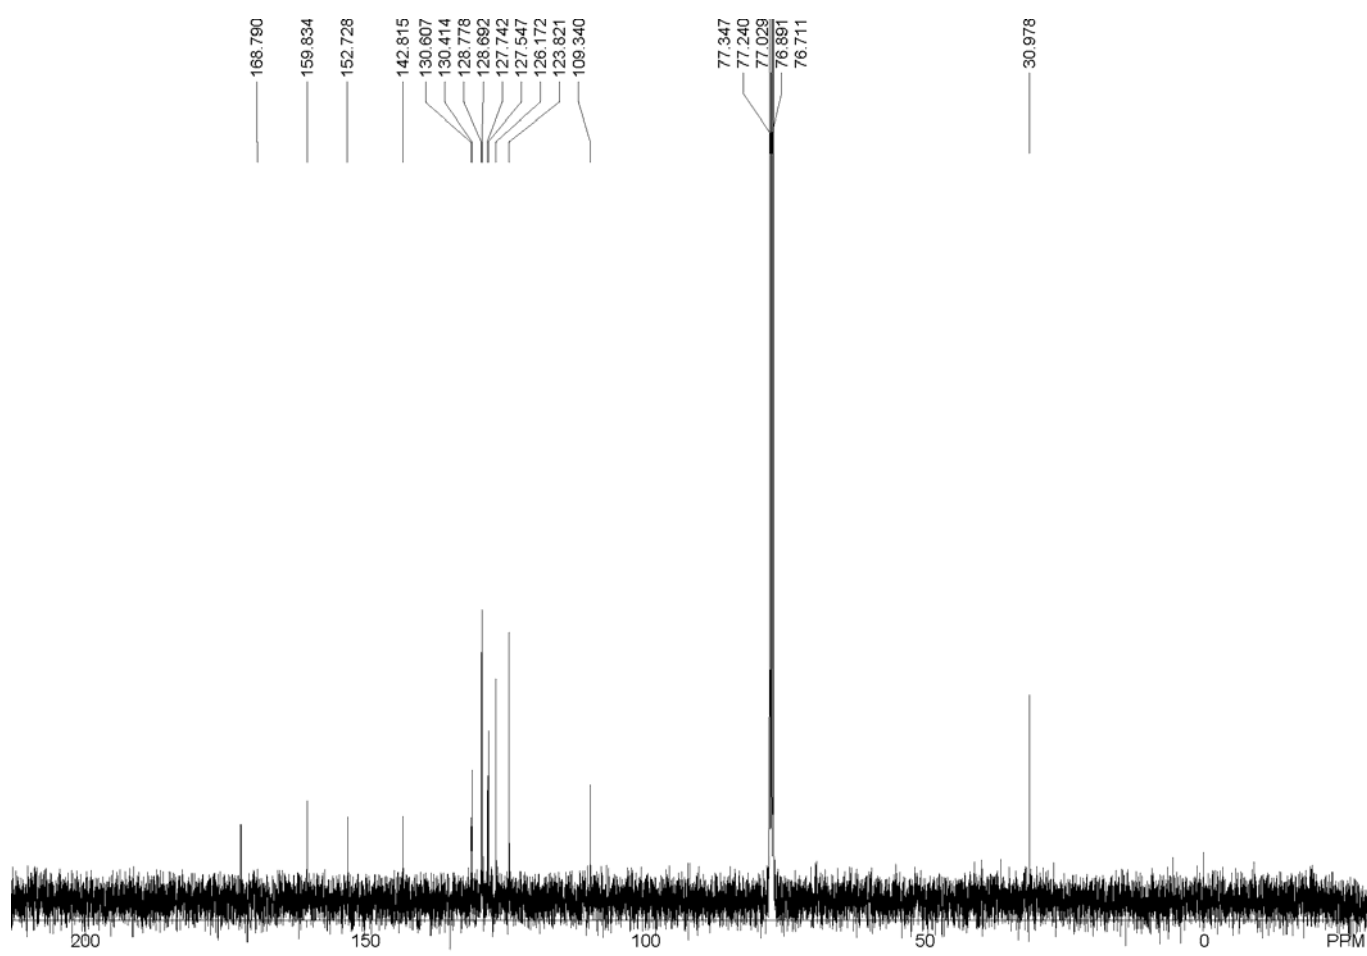

## VI. Copies of $^1\text{H}$ and $^{13}\text{C}$ NMR spectra of 8a-8d

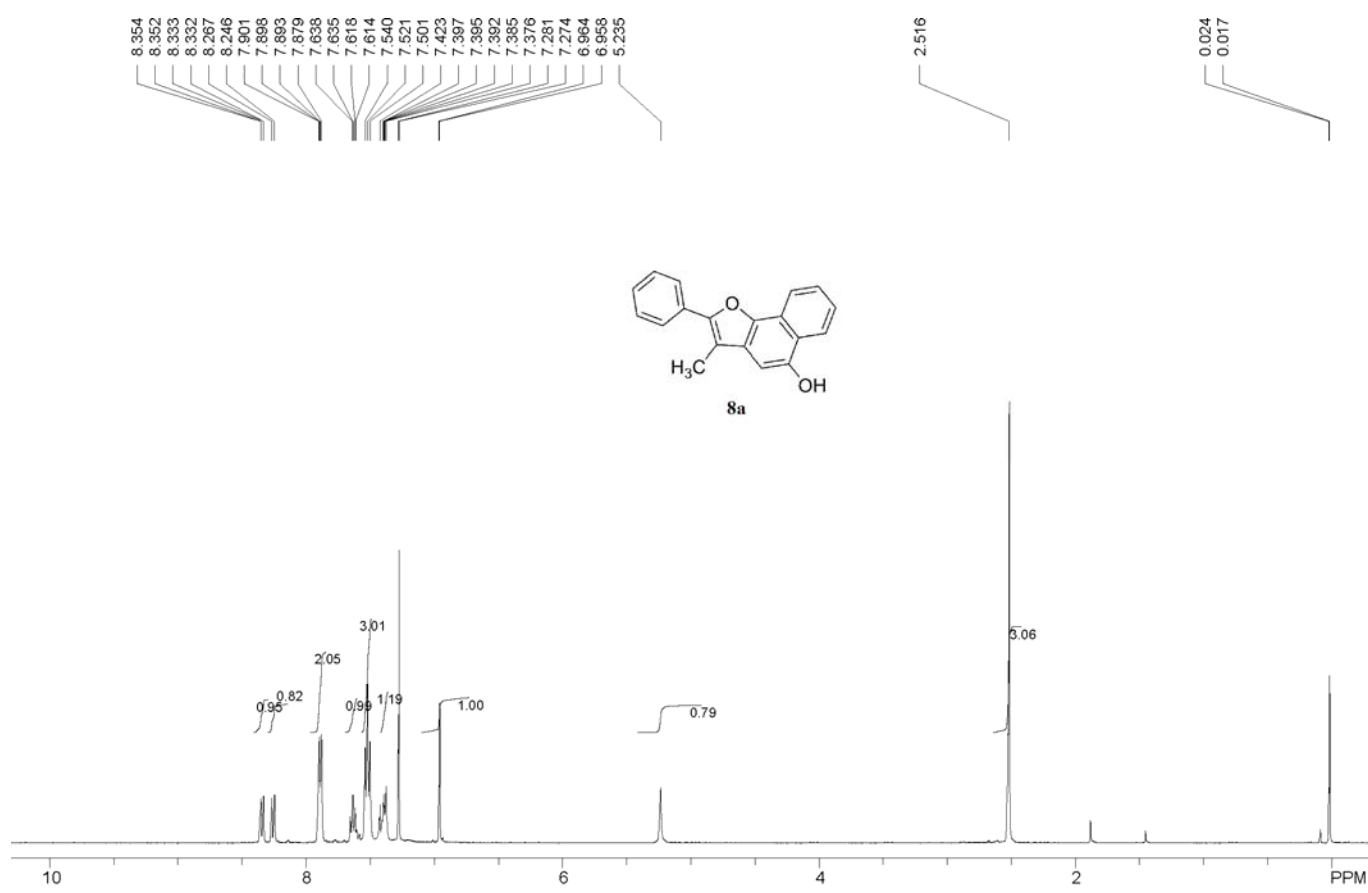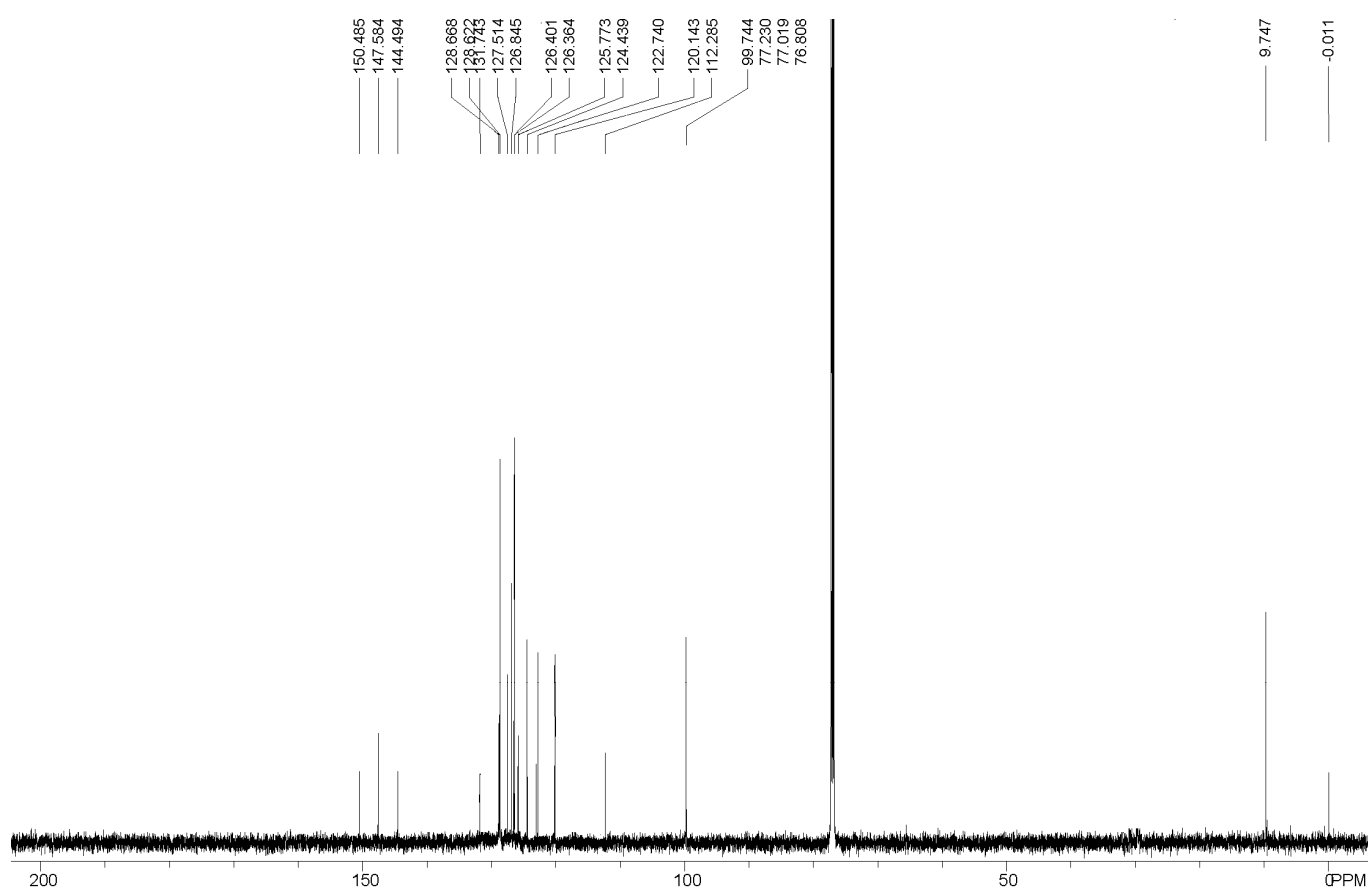

8.263  
8.241  
7.874  
7.854  
7.596  
7.590  
7.526  
7.507  
7.488  
7.376  
7.357  
7.308  
7.302  
7.285  
7.277  
6.946  
5.375  
3.991  
2.497  
0.018

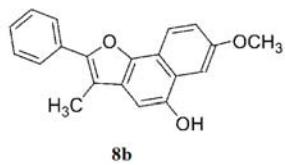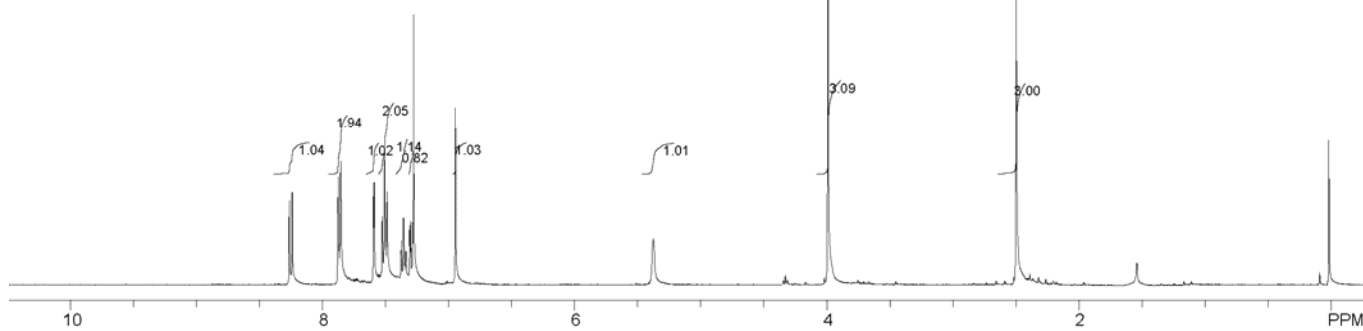

156.968  
149.734  
146.925  
144.853  
131.815  
128.630  
127.288  
126.238  
124.342  
124.117  
121.867  
118.990  
116.868  
112.298  
102.032  
100.344  
77.340  
77.022  
76.892  
76.705  
55.427  
30.950  
9.812

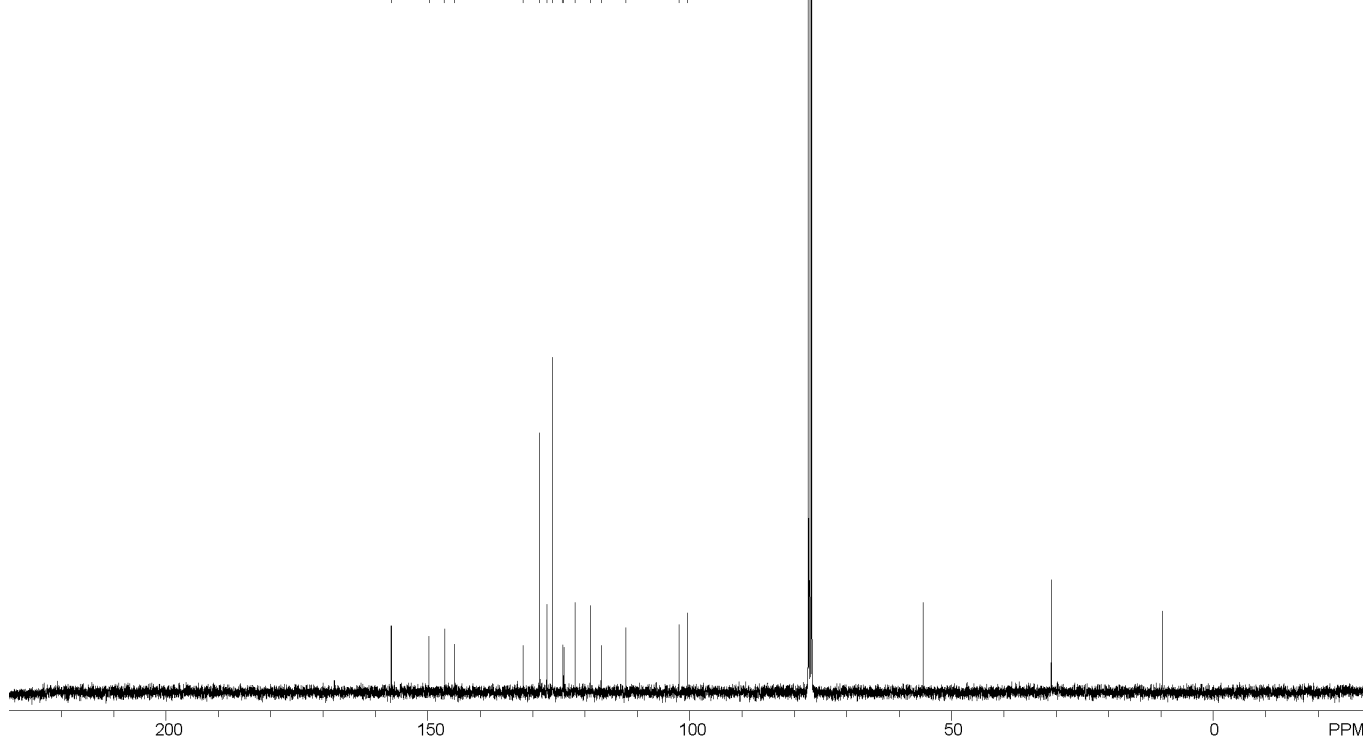

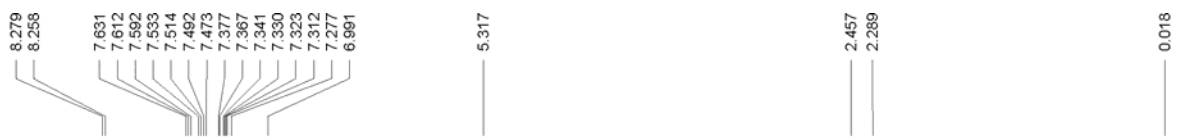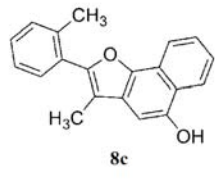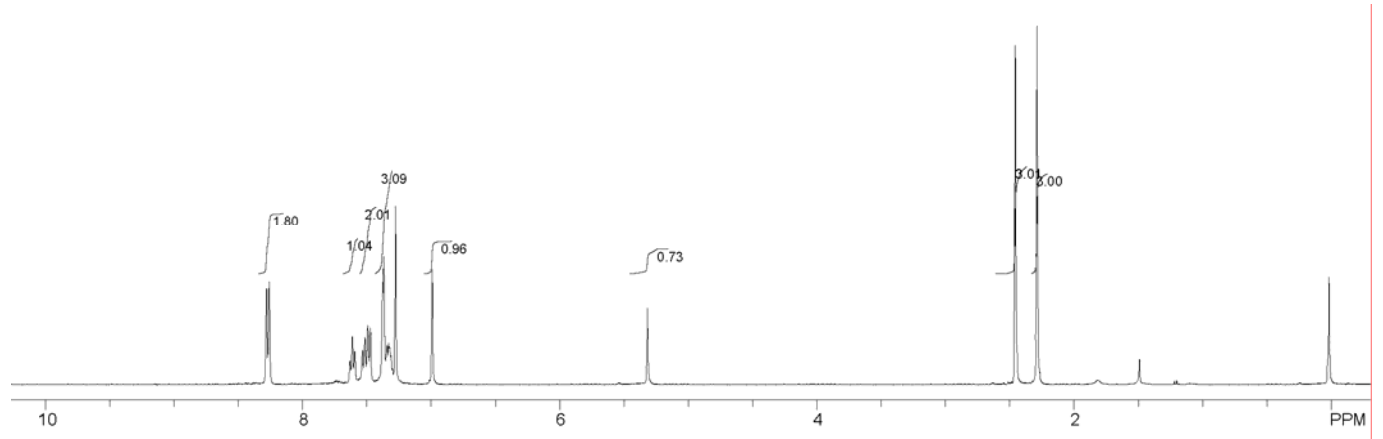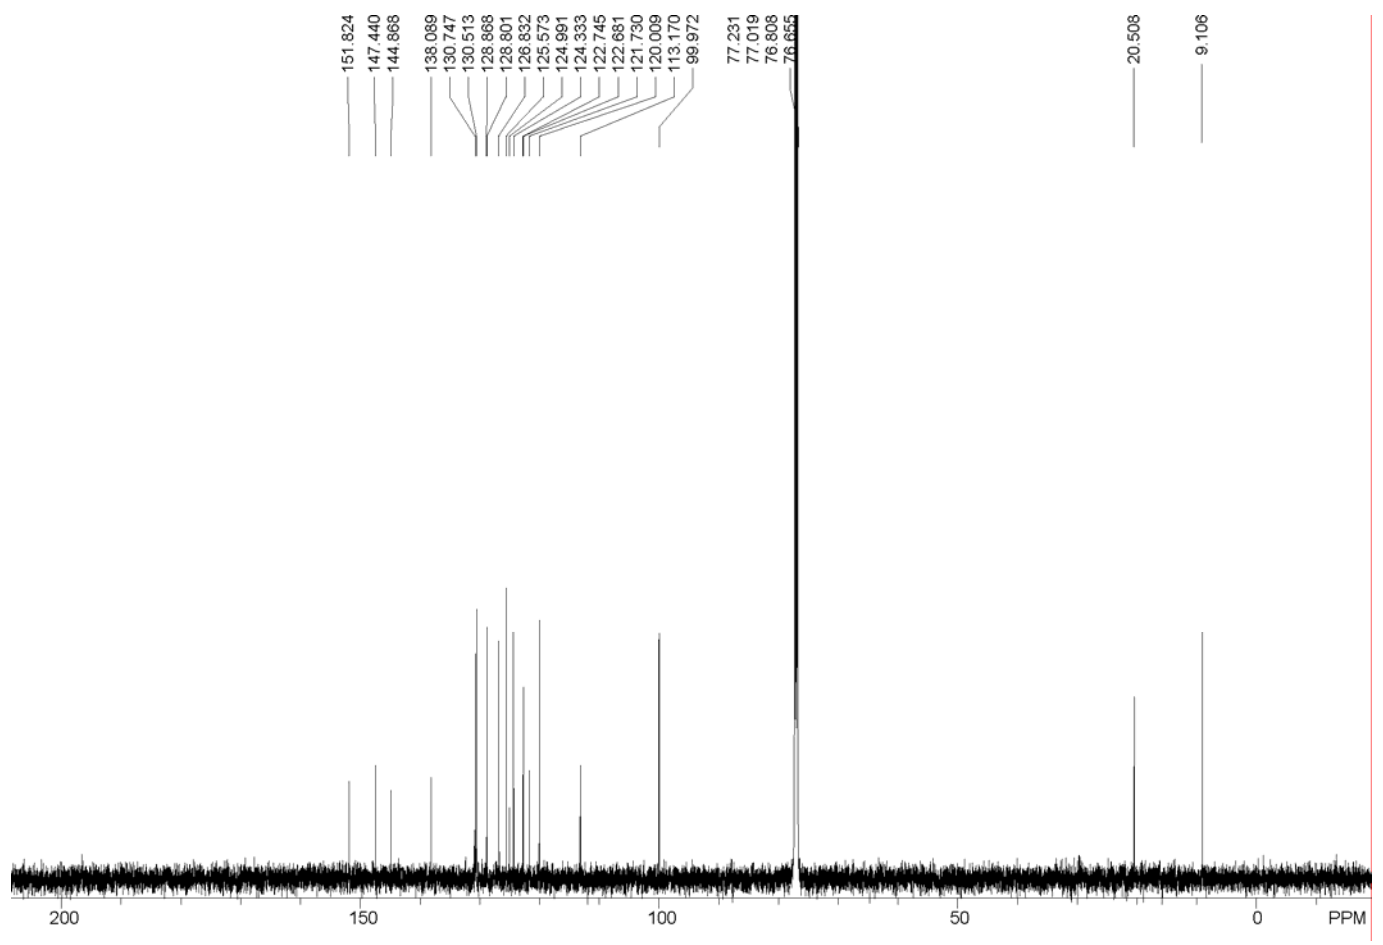



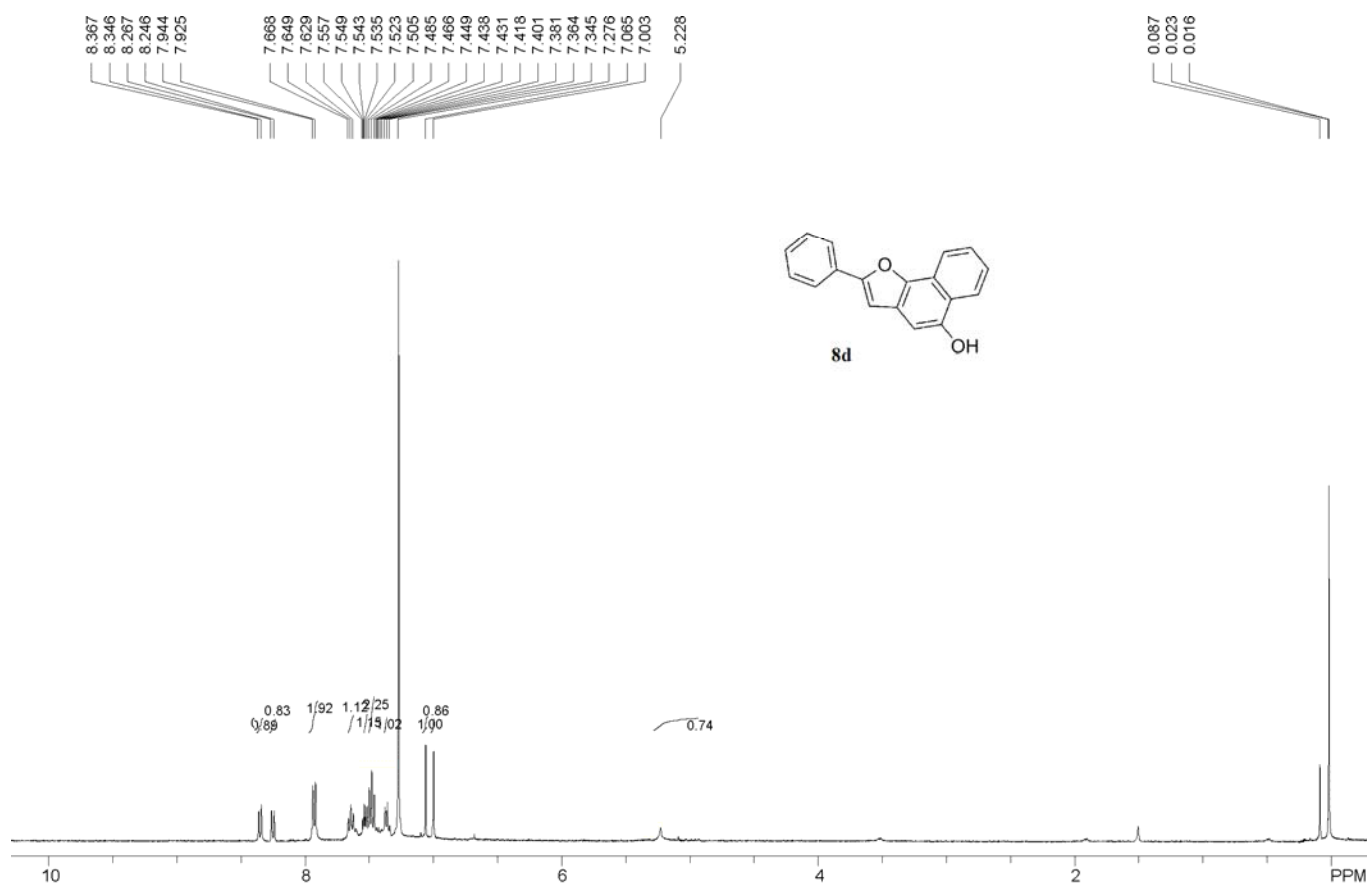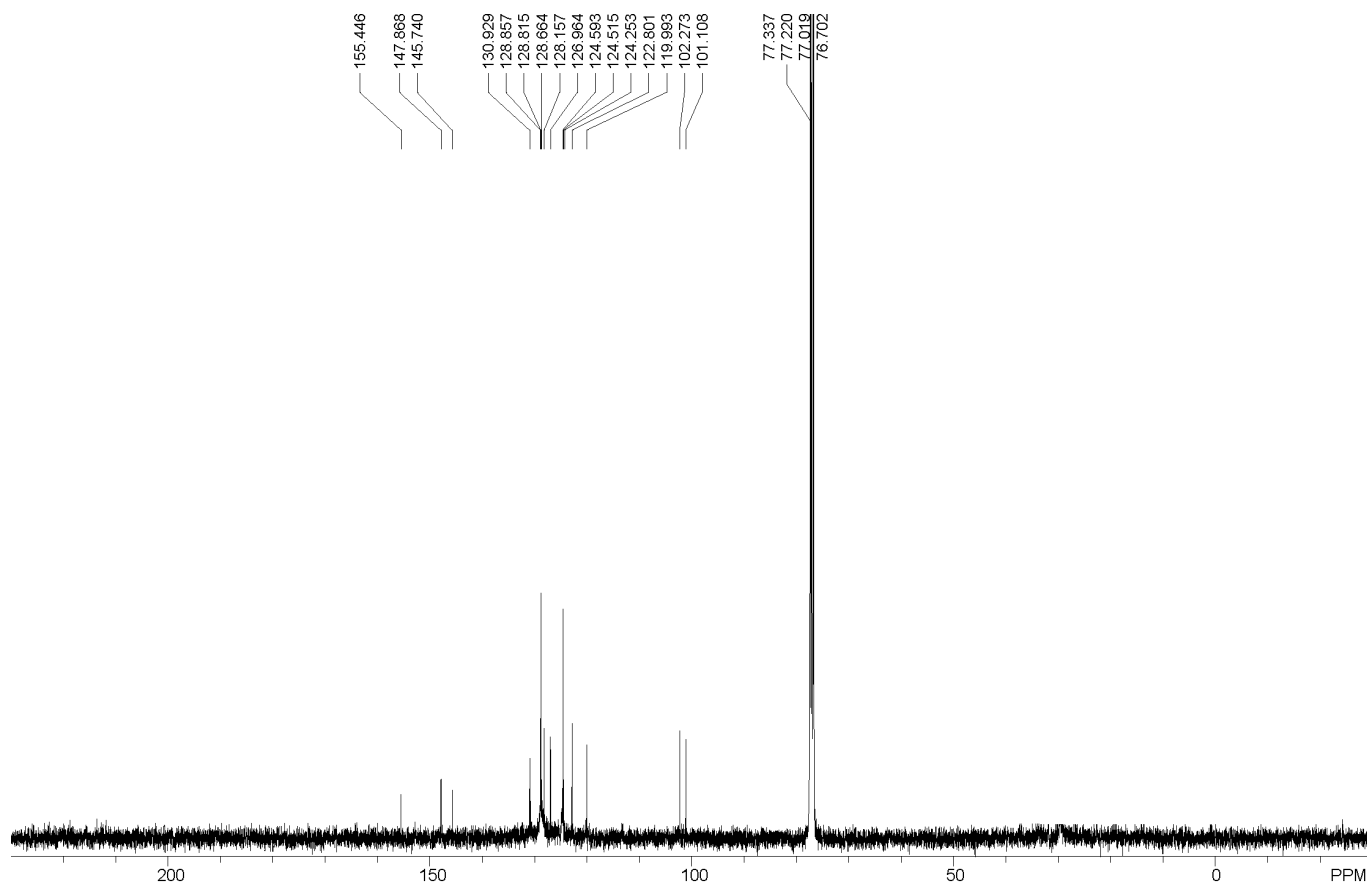

## VII. References

- (1) W. L. Wu, Z. J. Yao, Y. L. Li, J. C. Li, Y. Xia and Y. L. Wu, *J. Org. Chem.*, 1995, **60**, 3257.
- (2) J. Kuang, X. Xie and S. Ma, *Synthesis*, 2013, **45**, 592.
- (3) J. Kuang, H. Luo and S. Ma, *Adv. Synth. Catal.*, 2012, **354**, 933.
- (4) J. Kuang and S. Ma, *J. Org. Chem.*, 2009, **74**, 1763.
- (5) N. A. Petasis and K. A. Teets, *J. Am. Chem. Soc.*, 1992, **114**, 10328.
